# Supplementary material for: Oxytocin neurons mediate the effect of social isolation via the VTA circuits
Source: eLife. 2022 Apr 22;11:e73421. doi: 10.7554/eLife.73421 (PMC9075949; doi:10.7554/eLife.73421)
Supplement: Figure 1—figure supplement 1—source data 1. [file elife-73421-fig1-figsupp1-data1.xlsx]

## Sheet: FIGURE 1 - SUPPLEMENT 1
				Figure 1-Suppl 1D
	Figure 1-Suppl 1B			SOCIAL PREFERENCE		SOCIAL NOVELTY			Figure 1-Suppl 1J			Figure 1-Suppl 1L			Figure 1-Suppl 1M
	GROUPED	ISOLATED 24H		GROUPED	ISOLATED	GROUPED	ISOLATED		GROUPED	ISOLATED		Day 1	Day 4		Day 1	Day 4
	132.8	127.9		23.812	17.267	16.739	20.252		46.8	110.184		46.8	39.732		110.184	65.328
	78.1	108.5		18.716	18.13	9.112	17.526		50.004	105.072		50.004	25.296		105.072	65.088
	127.9	139.4		19.192	19.454	13.612	13.972		39.396	108.564		39.396	22.5		108.564	101.688
	108.5	141.2		19.804	14.192	18.98	12.094		54.756	107.82		54.756	31.392		107.82	66.636
	84.7	75.6		21.094	15.962	12.726	14.712		46.2	94.428		46.2	30.708		94.428	52.572
	95.5	138.8		20.33	19.112	13.664	14.766		49.44	98.34		49.44	20.256		98.34	83.52
	139.4	98.5		16.618	13.756	15.012	18.156
	141.2	97.8		21.183	13.211	11.571	14.547
	102.9	139.3		21.087	20.365	13.754	16.506
	157.1	132.5		16.086	19.181	12.334	15.764
				16.863	19.977	13.992	17.963
				16.601	21.33	16.797	16.253
				17.1858	17.0233	16.9211	17.6974
				14.2564	16.9676	23.7828	13.0826
				14.4885	16.8874	16.6841	14.4941
				19.8117	13.8299	17.5459	19.7806
	Figure 1-Suppl 1E
	GROUPED																ISOLATED
OBJECT	174.2	197.3	229	312	263.9	377.9	250.9	274.9	275.9	250.8	261.5	175.9	176	266	231.6	311.2	164.5	265.6	198	167	149.5	259.3	302.7	209.9	164.1	204.6	202.5	150.9	179.2	194.6	130.4	199
CENTER	47.7	90.8	75.7	95.8	61.4	82.8	112	87.2	53.7	98	65.9	75.1	47.4	69.4	121.8	72.6	78.5	69.8	78.6	58.1	58.5	58.6	55.7	58	52.2	96.6	65.4	59.5	81	71	41	67.2
STIMULUS 1	388.1	321.9	305.4	202	257.7	187.5	247.1	247.9	280.4	261.2	282.6	359.1	376.6	264.6	246.6	216.2	367	274.6	332.5	284.8	401.9	292	244.1	342.1	393.7	308.8	342.1	399.6	339.8	334.4	428.8	333.8
	Figure 1-Suppl 1F
	GROUPED																ISOLATED
OBJECT	0.241108	0.340183	0.455625	0.552276	0.425616	0.47554	0.394848	0.472583	0.305091	0.310959	0.294494	0.281901	0.276774	0.443281	0.399557	0.558442	0.290504	0.401522	0.39759	0.21556	0.300153	0.405797	0.533671	0.397734	0.268463	0.437424	0.280762	0.19104	0.322284	0.425318	0.189957	0.280836
STIMULUS 1	0.758892	0.659817	0.544375	0.447724	0.574384	0.52446	0.605152	0.527417	0.694909	0.689041	0.705506	0.718099	0.723226	0.556719	0.600443	0.441558	0.709496	0.598478	0.60241	0.78444	0.699847	0.594203	0.466329	0.602266	0.731537	0.562576	0.719238	0.80896	0.677716	0.574682	0.810043	0.719164
	Figure 1-Suppl 1G
	GROUPED																ISOLATED
STIMULUS 1	275.1	337.9	157.5	184.2	201.5	213.2	212.1	304.3	188.6	231.2	237	272.3	193.4	372.8	193.2	182	307.5	210.8	276.9	259.4	179.1	314.4	237.8	324.5	235.7	188.7	311	287.5	335.6	284.8	253.4	326.8
CENTER	53.1	46.2	108.9	110.2	31.8	95.4	131.1	116.9	79.1	140.7	71.3	103.8	47.8	22.8	49	77	48.6	47.3	114.6	97.8	65.9	86.6	135.6	93.8	60.8	120.8	63.9	90	46.6	91.6	123	84.2
STIMULUS 2	281.8	229.7	322.2	315.5	292	301.4	266.8	188.8	342.3	238.2	301.7	233.9	358.8	204.2	357.8	341	253.9	344.6	218.5	252.8	365	208.9	236.6	191.7	313.5	300.6	238	232.5	218	223.6	223.8	192.4
	Figure 1-Suppl 1H
	GROUPED																ISOLATED
STIMULUS 1	0.421729	0.410482	0.340818	0.401226	0.501209	0.368522	0.353421	0.421359	0.348887	0.444179	0.340554	0.505963	0.314252	0.321455	0.263808	0.343232	0.601	0.401733	0.508642	0.552729	0.236	0.674674	0.499782	0.536815	0.305723	0.34041	0.520317	0.630958	0.632664	0.516088	0.524506	0.480025
STIMULUS 2	0.578271	0.589518	0.659182	0.598774	0.498791	0.631478	0.646579	0.578641	0.651113	0.555821	0.659446	0.494037	0.685748	0.678545	0.736192	0.656768	0.399	0.598267	0.491358	0.447271	0.764	0.325326	0.500218	0.463185	0.694277	0.65959	0.479683	0.369042	0.367336	0.483912	0.475494	0.519975
Figure 1-Suppl 1K - RAW data													Figure 1-Suppl 1K -plotted data (normalized)
Grouped						Isolated							47.766	mean grouped trial 1					104.068	mean isolated trial 1
46.8	50.004	39.396	54.756	46.2	49.44	110.184	105.072	108.564	107.82	94.428	98.34		97.9776	104.685	82.4771	114.634	96.7215	103.505	105.877	100.965	104.32	103.605	90.7368	94.4959
34.38	19.704	38.496	46.68	36.816	37.692	106.188	65.52	89.088	111.288	81.012	87.936		71.9759	41.2511	80.5929	97.7264	77.0757	78.9097	102.037	62.9588	85.6056	106.938	77.8453	84.4986
41.184	22.584	22.332	31.908	34.26	24.504	83.328	84.864	112.092	90.864	51.324	73.764		86.2203	47.2805	46.7529	66.8007	71.7247	51.3001	80.0707	81.5467	107.71	87.3121	49.3178	70.8806
39.732	25.296	22.5	31.392	30.708	20.256	65.328	65.088	101.688	66.636	52.572	83.52		83.1805	52.9582	47.1046	65.7204	64.2884	42.4067	62.7743	62.5437	97.713	64.0312	50.517	80.2552

## Sheet: Statistical analysis
				FIGURE1-SUPPL 1D
	FIGURE1-SUPPL 1B			SOCIAL PREFERENCE		SOCIAL NOVELTY
	Unpaired t test			Unpaired t test		Unpaired t test
	P value	0.7814		P value	0.1768	P value	0.3946
	P value summary	ns		P value summary	ns	P value summary	ns
	Significantly different (P < 0.05)?	No		Significantly different (P < 0.05)?	No	Significantly different (P < 0.05)?	No
	One- or two-tailed P value?	Two-tailed		One- or two-tailed P value?	Two-tailed	One- or two-tailed P value?	Two-tailed
	t, df	t=0.2817, df=18		t, df	t=1.383, df=30	t, df	t=0.8638, df=30
	How big is the difference?			How big is the difference?		How big is the difference?
	Mean of column A	116.8		Mean of column A	18.57	Mean of column C	15.2
	Mean of column B	120		Mean of column B	17.29	Mean of column D	16.1
	Difference between means (B - A) ± SEM	3.140 ± 11.15		Difference between means (B - A) ± SEM	-1.280 ± 0.9256	Difference between means (D - C) ± SEM	0.8962 ± 1.037
	95% confidence interval	-20.28 to 26.56		95% confidence interval	-3.171 to 0.6101	95% confidence interval	-1.223 to 3.015
	R squared (eta squared)	0.004389		R squared (eta squared)	0.05994	R squared (eta squared)	0.02427
	F test to compare variances			F test to compare variances		F test to compare variances
	F, DFn, Dfd	1.316, 9, 9		F, DFn, Dfd	1.096, 15, 15	F, DFn, Dfd	2.160, 15, 15
	P value	0.6894		P value	0.8609	P value	0.1472
	P value summary	ns		P value summary	ns	P value summary	ns
	Significantly different (P < 0.05)?	No		Significantly different (P < 0.05)?	No	Significantly different (P < 0.05)?	No
	Data analyzed			Data analyzed		Data analyzed
	Sample size, column A	10		Sample size, column A	16	Sample size, column C	16
	Sample size, column B	10		Sample size, column B	16	Sample size, column D	16
	FIGURE1 - SUPPL 1F
		GROUPED		ISOLATED
		Object	Stimulus 1	Object	Stimulus 1
	Theoretical mean	0.5	0.5	0.5	0.5
	Actual mean	0.3893	0.6107	0.3337	0.6663
	Number of values	16	16	16	16
	One sample t test
	t, df	t=4.443, df=15	t=4.443, df=15	t=6.766, df=15	t=6.766, df=15
	P value (two tailed)	0.0005	0.0005	<0.0001	<0.0001
	P value summary	***	***	****	****
	Significant (alpha=0.05)?	Yes	Yes	Yes	Yes
	How big is the discrepancy?
	Discrepancy	-0.1107	0.1107	-0.1663	0.1663
	SD of discrepancy	0.0997	0.0997	0.09834	0.09834
	SEM of discrepancy	0.02492	0.02492	0.02459	0.02459
	95% confidence interval	-0.1639 to -0.05761	0.05761 to 0.1639	-0.2187 to -0.1139	0.1139 to 0.2187
	R squared (partial eta squared)	0.5682	0.5682	0.7532	0.7532			7.104
	FIGURE1 - SUPPL 1H
		GROUPED		ISOLATED
		Object	Stimulus 1	Object	Stimulus 1
	Theoretical mean	0.5	0.5	0.5	0.5
	Actual mean	0.3813	0.6187	0.4976	0.5024
	Number of values	16	16	16	16
	One sample t test
	t, df	t=7.104, df=15	t=7.104, df=15	t=0.07764, df=15	t=0.07764, df=15
	P value (two tailed)	<0.0001	<0.0001	0.9391	0.9391
	P value summary	****	****	ns	ns
	Significant (alpha=0.05)?	Yes	Yes	No	No
	How big is the discrepancy?
	Discrepancy	-0.1187	0.1187	-0.002371	0.002371
	SD of discrepancy	0.06682	0.06682	0.1222	0.1222
	SEM of discrepancy	0.01671	0.01671	0.03054	0.03054
	95% confidence interval	-0.1543 to -0.08307	0.08307 to 0.1543	-0.06746 to 0.06272	-0.06272 to 0.06746
	R squared (partial eta squared)	0.7709	0.7709	0.0004017	0.0004017
	Figure 1J			Figure 1L			Figure 1M
	Unpaired t test			Paired t test			Paired t test
	P value	<0.0001		P value	0.0018		P value	0.0052
	P value summary	****		P value summary	**		P value summary	**
	Significantly different (P < 0.05)?	Yes		Significantly different (P < 0.05)?	Yes		Significantly different (P < 0.05)?	Yes
	One- or two-tailed P value?	Two-tailed		One- or two-tailed P value?	Two-tailed		One- or two-tailed P value?	Two-tailed
	t, df	t=17.01, df=10		t, df	t=6.020, df=5		t, df	t=4.735, df=5
	How big is the difference?			Number of pairs	6		Number of pairs	6
	Mean of column A	47.77
	Mean of column B	104.1		How big is the difference?			How big is the difference?
	Difference between means (B - A) ± SEM	56.30 ± 3.309		Mean of differences (B - A)	-19.45		Mean of differences (B - A)	-31.6
	95% confidence interval	48.93 to 63.68		SD of differences	7.915		SD of differences	16.35
	R squared (eta squared)	0.9666		SEM of differences	3.231		SEM of differences	6.673
	F test to compare variances			95% confidence interval	-27.76 to -11.15		95% confidence interval	-48.75 to -14.44
	F, DFn, Dfd	1.525, 5, 5		R squared (partial eta squared)	0.8788		R squared (partial eta squared)	0.8176
	P value	0.6545
	P value summary	ns		How effective was the pairing?			How effective was the pairing?
	Significantly different (P < 0.05)?	No		Correlation coefficient (r)	0.1936		Correlation coefficient (r)	0.3413
	Data analyzed			P value (one tailed)	0.3566		P value (one tailed)	0.254
	Sample size, column A	6		P value summary	ns		P value summary	ns
	Sample size, column B	6		Was the pairing significantly effective?	No		Was the pairing significantly effective?	No

## Sheet: RM-2 way ANOVA Suppl 1E
	Figure 1-Suppl 1E
	Two-way RM ANOVA	Matching: Stacked
	Assume sphericity?	No
	Alpha	0.05
	Source of Variation	% of total variation	P value	P value summary	Significant?	Geisser-Greenhouse's epsilon
	Chamber x House condition	4.818	0.0003	***	Yes
	Chamber	79.6	<0.0001	****	Yes	0.5839
	House condition	0.01295	0.2911	ns	No
	Subject	0.3365	>0.9999	ns	No
	ANOVA table	SS	DF	MS	F (DFn, DFd)	P value
	Chamber x House condition	55508	2	27754	F (2, 60) = 9.487	P=0.0003
	Chamber	917048	2	458524	F (1.168, 35.03) = 156.7	P<0.0001
	House condition	149.3	1	149.3	F (1, 30) = 1.155	P=0.2911
	Subject	3877	30	129.2	F (30, 60) = 0.04418	P>0.9999
	Residual	175531	60	2926
	Difference between column means
	Mean of GROUPED	202.7
	Mean of ISOLATED	200.2
	Difference between means	2.494
	SE of difference	2.321
	95% CI of difference	-2.245 to 7.233
	Data summary
	Number of columns (House condition)	2
	Number of rows (Chamber)	3
	Number of subjects (Subject)	32
	Number of missing values	0
	Within each column, compare rows (simple effects within columns)
	Number of families	2
	Number of comparisons per family	3
	Alpha	0.05
	Tukey's multiple comparisons test	Mean Diff.	95.00% CI of diff.	Below threshold?	Summary	Adjusted P Value
	GROUPED
	OBJECT vs. CENTER	173.2	137.5 to 208.9	Yes	****	<0.0001
	OBJECT vs. STIMULUS 1	-25.99	-98.90 to 46.91	No	ns	0.6327
	CENTER vs. STIMULUS 1	-199.2	-246.7 to -151.8	Yes	****	<0.0001
	ISOLATED
	OBJECT vs. CENTER	130.8	100.5 to 161.0	Yes	****	<0.0001
	OBJECT vs. STIMULUS 1	-142.4	-203.3 to -81.51	Yes	****	<0.0001
	CENTER vs. STIMULUS 1	-273.1	-309.7 to -236.6	Yes	****	<0.0001
	Test details	Mean 1	Mean 2	Mean Diff.	SE of diff.	N1	N2	q	DF
	GROUPED
	OBJECT vs. CENTER	251.8	78.58	173.2	13.75	16	16	17.82	15
	OBJECT vs. STIMULUS 1	251.8	277.8	-25.99	28.07	16	16	1.31	15
	CENTER vs. STIMULUS 1	78.58	277.8	-199.2	18.28	16	16	15.42	15
	ISOLATED
	OBJECT vs. CENTER	196.4	65.61	130.8	11.65	16	16	15.88	15
	OBJECT vs. STIMULUS 1	196.4	338.8	-142.4	23.44	16	16	8.592	15
	CENTER vs. STIMULUS 1	65.61	338.8	-273.1	14.09	16	16	27.42	15

## Sheet: RM-2 way ANOVA Suppl 1G
		Figure 1-Suppl 1G
		Two-way RM ANOVA	Matching: Stacked
		Assume sphericity?	No
		Alpha	0.05
		Source of Variation	% of total variation	P value	P value summary	Significant?	Geisser-Greenhouse's epsilon
		Chamber x House condition	2.247	0.0606	ns	No
		Chamber	74.54	<0.0001	****	Yes	0.7499
		House condition	0.01191	0.2501	ns	No
		Subject	0.2597	>0.9999	ns	No
		ANOVA table	SS	DF	MS	F (DFn, DFd)	P value
		Chamber x House condition	20408	2	10204	F (2, 60) = 2.938	P=0.0606
		Chamber	677027	2	338513	F (1.500, 44.99) = 97.47	P<0.0001
		House condition	108.2	1	108.2	F (1, 30) = 1.376	P=0.2501
		Subject	2359	30	78.62	F (30, 60) = 0.02264	P>0.9999
		Residual	208376	60	3473
		Difference between column means
		Mean of GROUPED	200.4
		Mean of ISOLATED	202.5
		Difference between means	-2.123
		SE of difference	1.81
		95% CI of difference	-5.819 to 1.573
		Data summary
		Number of columns (House condition)	2
		Number of rows (Chamber)	3
		Number of subjects (Subject)	32
		Number of missing values	0

## Sheet: RM-ANOVA Figure 1-Suppl 1K
	Figure 1-Suppl 1K
	Two-way RM ANOVA	Matching: Stacked
	Assume sphericity?	No
	Alpha	0.05
	Source of Variation	% of total variation	P value	P value summary	Significant?	Geisser-Greenhouse's epsilon
	trial x house condition	2.501	0.3848	ns	No
	trial	44	<0.0001	****	Yes	0.6689
	house condition	6.125	0.1379	ns	No
	Subject	23.56	0.0102	*	Yes
	ANOVA table	SS	DF	MS	F (DFn, DFd)	P value
	trial x house condition	495.3	3	165.1	F (3, 30) = 1.050	P=0.3848
	trial	8712	3	2904	F (2.007, 20.07) = 18.47	P<0.0001
	house condition	1213	1	1213	F (1, 10) = 2.600	P=0.1379
	Subject	4664	10	466.4	F (10, 30) = 2.967	P=0.0102
	Residual	4716	30	157.2
	Difference between column means
	Mean of Grouped	73.89
	Mean of isolated	83.94
	Difference between means	-10.05
	SE of difference	6.235
	95% CI of difference	-23.95 to 3.838
	Data summary
	Number of columns (house condition)	2
	Number of rows (trial)	4
	Number of subjects (Subject)	12
	Number of missing values	0
