# Supplementary material for: Oxytocin neurons mediate the effect of social isolation via the VTA circuits
Source: eLife. 2022 Apr 22;11:e73421. doi: 10.7554/eLife.73421 (PMC9075949; doi:10.7554/eLife.73421)
Supplement: Figure 1—figure supplement 2—source data 1. [file elife-73421-fig1-figsupp2-data1.xlsx]

## Sheet: FIGURE 1 - SUPPLEMENT 2
	Figure 1-Suppl 2C			Figure 1-Suppl 2D			Figure 1-Suppl 2E			Figure 1-Suppl 2F			Figure 1-Suppl 2G			Figure 1-Suppl 2I
	OBJECT 1	OBJECT 2		OBJECT 1	OBJECT 2		OBJECT 1	OBJECT 3		OBJECT 1	OBJECT 3		GROUPED	ISOLATED		GROUPED	ISOLATED
	0.591797	0.408203		0.600414	0.399586		0.315417	0.684583		0.376842	0.623158		24.476	30.26		14.2	13.6652
	0.425566	0.574434		0.488095	0.511905		0.305317	0.694683		0.30226	0.69774		44.533	38.069		14.2844	21.3588
	0.529511	0.470489		0.71987	0.28013		0.586631	0.413369		0.378457	0.621543		39.129	34.966		15.0904	18.1018
	0.61689	0.38311		0.384466	0.615534		0.198755	0.801245		0.44186	0.55814		30.331	31.216		15.8357	15.528
	0.627163	0.372837		0.289873	0.710127		0.249656	0.750344		0.347706	0.652294		32.794	37.379		14.8286	19.1733
	0.55706	0.44294		0.465658	0.534342		0.585848	0.414152		0.37764	0.62236		36.031	42.189		16.3832	16.486
	0.474705	0.525295		0.550752	0.449248		0.2203	0.7797		0.456781	0.543219		33.508	40.04		13.3239	17.6837
	0.557811	0.442189		0.515094	0.484906		0.20638	0.79362		0.203668	0.796332		38.791	30.128		15.8078	16.8681
	0.479898	0.520102		0.427152	0.572848		0.523551	0.476449		0.406467	0.593533		36.278	50.535		14.4092	18.4852
	0.673988	0.326012		0.346206	0.653794		0.581441	0.418559		0.506363	0.493637		46.736	41.445		15.4416	16.9849
	Figure 1-Suppl 2J
	GROUPED										ISOLATED
Open	76.28	62	57.56	33.96	79.56	55.2	42.08	13	32.52	77.56	8.04	78.92	63.48	83.44	97.12	58.84	36.32	49.6	63.24	88.08
Center	60.84	94.96	60.2	62.88	102.4	47.56	51.6	52.68	61.2	44.64	34.04	44.04	51.4	64.88	54.36	40.28	74.8	52	55.2	59.52
Closed	162.56	142.52	181.64	202.68	117.56	196.68	206	233.76	206.04	177.4	257.44	176.76	184.68	151.12	148	200.64	188.48	198.08	181.36	152
								Figure 1-Suppl 2N					Figure 1-Suppl 2O
	Figure 1-Suppl 2K			Figure 1-Suppl 2L				GROUPED		ISOLATED			GROUPED		ISOLATED
	Open arm	Closed arm		Open arm	Closed arm			non social chamber	social chamber	non social chamber	social chamber		non social chamber	social chamber	non social chamber	social chamber
	0.319377	0.680623		0.030285	0.969715			258.15	387.95	277.6	333.2		322.25	359.1	297.05	439.1
	0.303149	0.696851		0.308667	0.691333			254.6	317.4	229.3	341.35		288.9	421.3	248.7	435.2
	0.240635	0.759365		0.255803	0.744197			502.35	193.4	399.45	226.5		396.65	324.65	349	380.7
	0.143509	0.856491		0.35573	0.64427			372.4	183.1	364.7	231.9		271.1	396.9	394.5	318.15
	0.403612	0.596388		0.396214	0.603786			178.4	250.25	297.8	343.85		294.7	430.35	254.2	474.9
	0.219152	0.780848		0.226761	0.773239			465.6	246.6	425.35	239		280.05	360.7	248.7	379
	0.169623	0.830377		0.161566	0.838434			336.75	230.55	289.65	390.3		323.8	419.95	304	456.6
	0.052683	0.947317		0.200258	0.799742			382	263.85	502.65	205.65		312.4	303.95	337.35	275.15
	0.136318	0.863682		0.258545	0.741455			418.35	250.95	301.15	430.4		296	352.2	267.2	431.5
	0.304205	0.695795		0.366878	0.633122			299	423.85	493.2	234.8		383.2	340.65	285.95	388.65
	Figure 1-Suppl 2P
	GROUPED										ISOLATED
Pre-test	387.95	317.4	193.4	183.1	250.25	246.6	230.55	263.85	250.95	423.85	333.2	341.35	226.5	231.9	343.85	239	390.3	205.65	430.4	234.8
Post-test	359.1	421.3	324.65	396.9	430.35	360.7	419.95	303.95	352.2	340.65	439.1	435.2	380.7	318.15	474.9	379	456.6	275.15	431.5	388.65
	Figure 1-Suppl 2Q
	GROUPED
Pre-test	0.600449	0.554895	0.277973	0.329613	0.58381	0.346251	0.406399	0.408531	0.374944	0.58636
Post-test	0.527042	0.593213	0.45009	0.594162	0.593545	0.562934	0.564639	0.493145	0.543351	0.470609
	Figure 1-Suppl 2R
	ISOLATED
Pre-test	0.545514	0.598178	0.36185	0.388703	0.535884	0.35975	0.574013	0.290343	0.58834	0.322527
Post-test	0.596482	0.63635	0.521721	0.446432	0.651351	0.603792	0.600316	0.449224	0.617575	0.576119

## Sheet: Statistical analysis
	FIGURE1 SUPPL 2C			FIGURE1 SUPPL 2D			FIGURE1 SUPPL 2E			FIGURE1 SUPPL 2F
	Paired t test			Paired t test			Paired t test			Paired t test
	P value	0.0571		P value	0.6088		P value	0.0489		P value	0.0015
	P value summary	ns		P value summary	ns		P value summary	*		P value summary	**
	Significantly different (P < 0.05)?	No		Significantly different (P < 0.05)?	No		Significantly different (P < 0.05)?	Yes		Significantly different (P < 0.05)?	Yes
	One- or two-tailed P value?	Two-tailed		One- or two-tailed P value?	Two-tailed		One- or two-tailed P value?	Two-tailed		One- or two-tailed P value?	Two-tailed
	t, df	t=2.181, df=9		t, df	t=0.5301, df=9		t, df	t=2.276, df=9		t, df	t=4.487, df=9
	Number of pairs	10		Number of pairs	10		Number of pairs	10		Number of pairs	10
	How big is the difference?			How big is the difference?			How big is the difference?			How big is the difference?
	Mean of differences (B - A)	-0.1069		Mean of differences (B - A)	0.04248		Mean of differences (B - A)	0.2453		Mean of differences (B - A)	0.2404
	SD of differences	0.155		SD of differences	0.2534		SD of differences	0.3409		SD of differences	0.1694
	SEM of differences	0.049		SEM of differences	0.08014		SEM of differences	0.1078		SEM of differences	0.05358
	95% confidence interval	-0.2177 to 0.003974		95% confidence interval	-0.1388 to 0.2238		95% confidence interval	0.001503 to 0.4892		95% confidence interval	0.1192 to 0.3616
	R squared (partial eta squared)	0.3458		R squared (partial eta squared)	0.03028		R squared (partial eta squared)	0.3653		R squared (partial eta squared)	0.6911
	How effective was the pairing?			How effective was the pairing?			How effective was the pairing?			How effective was the pairing?
	Correlation coefficient (r)	Perfect line		Correlation coefficient (r)	Perfect line		Correlation coefficient (r)	Perfect line		Correlation coefficient (r)	Perfect line
	P value (one tailed)			P value (one tailed)			P value (one tailed)			P value (one tailed)
	P value summary			P value summary			P value summary			P value summary
	Was the pairing significantly effective?			Was the pairing significantly effective?			Was the pairing significantly effective?			Was the pairing significantly effective?
	FIGURE1 SUPPL 2G			FIGURE1 SUPPL 2I			FIGURE1 SUPPL 2K			FIGURE1 SUPPL 1L
	Unpaired t test			Unpaired t test			Paired t test			Paired t test
	P value	0.6434		P value	0.0031		P value	<0.0001		P value	<0.0001
	P value summary	ns		P value summary	**		P value summary	****		P value summary	****
	Significantly different (P < 0.05)?	No		Significantly different (P < 0.05)?	Yes		Significantly different (P < 0.05)?	Yes		Significantly different (P < 0.05)?	Yes
	One- or two-tailed P value?	Two-tailed		One- or two-tailed P value?	Two-tailed		One- or two-tailed P value?	Two-tailed		One- or two-tailed P value?	Two-tailed
	t, df	t=0.4708, df=18		t, df	t=3.419, df=18		t, df	t=8.101, df=9		t, df	t=7.025, df=9
							Number of pairs	10		Number of pairs	10
	How big is the difference?			How big is the difference?
	Mean of column A	36.26		Mean of column A	14.96		How big is the difference?			How big is the difference?
	Mean of column B	37.62		Mean of column B	17.43		Mean of differences (B - A)	0.5415		Mean of differences (B - A)	0.4879
	Difference between means (B - A) ± SEM	1.362 ± 2.893		Difference between means (B - A) ± SEM	2.473 ± 0.7234		SD of differences	0.2114		SD of differences	0.2196
	95% confidence interval	-4.716 to 7.440		95% confidence interval	0.9533 to 3.993		SEM of differences	0.06685		SEM of differences	0.06944
	R squared (eta squared)	0.01216		R squared (eta squared)	0.3937		95% confidence interval	0.3903 to 0.6928		95% confidence interval	0.3308 to 0.6450
							R squared (partial eta squared)	0.8794		R squared (partial eta squared)	0.8458
	F test to compare variances			F test to compare variances
	F, DFn, Dfd	1.054, 9, 9		F, DFn, Dfd	5.044, 9, 9		How effective was the pairing?			How effective was the pairing?
	P value	0.9391		P value	0.0244		Correlation coefficient (r)	Perfect line		Correlation coefficient (r)	Perfect line
	P value summary	ns		P value summary	*		P value (one tailed)			P value (one tailed)
	Significantly different (P < 0.05)?	No		Significantly different (P < 0.05)?	Yes		P value summary			P value summary
							Was the pairing significantly effective?			Was the pairing significantly effective?
	Data analyzed			Data analyzed
	Sample size, column A	10		Sample size, column A	10
	Sample size, column B	10		Sample size, column B	10
	FIGURE1 SUPPL 1N
	Grouped		Isolated
	Paired t test		Paired t test
	P value	0.1815	P value	0.2772
	P value summary	ns	P value summary	ns
	Significantly different (P < 0.05)?	No	Significantly different (P < 0.05)?	No
	One- or two-tailed P value?	Two-tailed	One- or two-tailed P value?	Two-tailed
	t, df	t=1.448, df=9	t, df	t=1.157, df=9
	Number of pairs	10	Number of pairs	10
	How big is the difference?		How big is the difference?
	Mean of differences (B - A)	-71.97	Mean of differences (D - C)	-60.39
	SD of differences	157.1	SD of differences	165.1
	SEM of differences	49.69	SEM of differences	52.22
	95% confidence interval	-184.4 to 40.44	95% confidence interval	-178.5 to 57.73
	R squared (partial eta squared)	0.189	R squared (partial eta squared)	0.1294
	How effective was the pairing?		How effective was the pairing?
	Correlation coefficient (r)	-0.5141	Correlation coefficient (r)	-0.8054
	P value (one tailed)	0.0642	P value (one tailed)	0.0025
	P value summary	ns	P value summary	**
	Was the pairing significantly effective?	No	Was the pairing significantly effective?	Yes
	FIGURE1 SUPPL 1O
	Grouped		Isolated
	Paired t test		Paired t test
	P value	0.0472	P value	0.0132
	P value summary	*	P value summary	*
	Significantly different (P < 0.05)?	Yes	Significantly different (P < 0.05)?	Yes
	One- or two-tailed P value?	Two-tailed	One- or two-tailed P value?	Two-tailed
	t, df	t=2.297, df=9	t, df	t=3.075, df=9
	Number of pairs	10	Number of pairs	10
	How big is the difference?		How big is the difference?
	Mean of differences (B - A)	54.07	Mean of differences (D - C)	99.23
	SD of differences	74.43	SD of differences	102
	SEM of differences	23.54	SEM of differences	32.27
	95% confidence interval	0.8293 to 107.3	95% confidence interval	26.23 to 172.2
	R squared (partial eta squared)	0.3697	R squared (partial eta squared)	0.5124
	How effective was the pairing?		How effective was the pairing?
	Correlation coefficient (r)	-0.4971	Correlation coefficient (r)	-0.6618
	P value (one tailed)	0.0719	P value (one tailed)	0.0186
	P value summary	ns	P value summary	*
	Was the pairing significantly effective?	No	Was the pairing significantly effective?	Yes
	FIGURE1 SUPPL 1P						FIGURE1 SUPPL 2Q			FIGURE1 SUPPL 2R
	Grouped		Isolated				Paired t test			Paired t test
	Paired t test		Paired t test				P value	0.0452		P value	0.0026
	P value	0.0111	P value	<0.0001			P value summary	*		P value summary	**
	P value summary	*	P value summary	****			Significantly different (P < 0.05)?	Yes		Significantly different (P < 0.05)?	Yes
	Significantly different (P < 0.05)?	Yes	Significantly different (P < 0.05)?	Yes			One- or two-tailed P value?	Two-tailed		One- or two-tailed P value?	Two-tailed
	One- or two-tailed P value?	Two-tailed	One- or two-tailed P value?	Two-tailed			t, df	t=2.323, df=9		t, df	t=4.118, df=9
	t, df	t=3.183, df=9	t, df	t=6.638, df=9			Number of pairs	10		Number of pairs	10
	Number of pairs	10	Number of pairs	10
							How big is the difference?			How big is the difference?
	How big is the difference?		How big is the difference?				Mean of differences (B - A)	0.09235		Mean of differences (D - C)	0.1134
	Mean of differences (B - A)	96.19	Mean of differences (D - C)	100.2			SD of differences	0.1257		SD of differences	0.0871
	SD of differences	95.54	SD of differences	47.74			SEM of differences	0.03975		SEM of differences	0.02754
	SEM of differences	30.21	SEM of differences	15.1			95% confidence interval	0.002436 to 0.1823		95% confidence interval	0.05112 to 0.1757
	95% confidence interval	27.84 to 164.5	95% confidence interval	66.05 to 134.3			R squared (partial eta squared)	0.3749		R squared (partial eta squared)	0.6533
	R squared (partial eta squared)	0.5296	R squared (partial eta squared)	0.8304
							How effective was the pairing?			How effective was the pairing?
	How effective was the pairing?		How effective was the pairing?				Correlation coefficient (r)	0.1466		Correlation coefficient (r)	0.7085
	Correlation coefficient (r)	-0.1441	Correlation coefficient (r)	0.7992			P value (one tailed)	0.343		P value (one tailed)	0.0109
	P value (one tailed)	0.3456	P value (one tailed)	0.0028			P value summary	ns		P value summary	*
	P value summary	ns	P value summary	**			Was the pairing significantly effective?	No		Was the pairing significantly effective?	Yes
	Was the pairing significantly effective?	No	Was the pairing significantly effective?	Yes

## Sheet: RM ANOVA SUPPL2J
FIGURE1-SUPPL 2J
GROUPED									ISOLATED
Repeated measures ANOVA summary									Repeated measures ANOVA summary
Assume sphericity?	No								Assume sphericity?	No
F	50.54								F	56.21
P value	<0.0001								P value	<0.0001
P value summary	****								P value summary	****
Statistically significant (P < 0.05)?	Yes								Statistically significant (P < 0.05)?	Yes
Geisser-Greenhouse's epsilon	0.6531								Geisser-Greenhouse's epsilon	0.5911
R squared	0.8488								R squared	0.862
Was the matching effective?									Was the matching effective?
F	4.838e-06								F	5.166e-06
P value	>0.9999								P value	>0.9999
P value summary	ns								P value summary	ns
Is there significant matching (P < 0.05)?	No								Is there significant matching (P < 0.05)?	No
R squared	3.656e-07								R squared	3.565e-07
ANOVA table	SS	DF	MS	F (DFn, DFd)	P value				ANOVA table	SS	DF	MS	F (DFn, DFd)	P value
COMPARTMENT (between columns)	103517	2	51759	F (1.306, 11.76) = 50.54	P<0.0001				COMPARTMENT (between columns)	106266	2	53133	F (1.182, 10.64) = 56.21	P<0.0001
Individual (between rows)	0.04459	9	0.004954	F (9, 18) = 4.838e-006	P>0.9999				Individual (between rows)	0.04395	9	0.004883	F (9, 18) = 5.166e-006	P>0.9999
Residual (random)	18434	18	1024						Residual (random)	17013	18	945.2
Total	121951	29							Total	123279	29
Data summary									Data summary
Number of treatments (columns)	3								Number of treatments (columns)	3
Number of subjects (rows)	10								Number of subjects (rows)	10
Number of missing values	0								Number of missing values	0
Number of families	1								Number of families	1
Number of comparisons per family	3								Number of comparisons per family	3
Alpha	0.05								Alpha	0.05
Tukey's multiple comparisons test	Mean Diff.	95.00% CI of diff.	Below threshold?	Summary	Adjusted P Value				Tukey's multiple comparisons test	Mean Diff.	95.00% CI of diff.	Below threshold?	Summary	Adjusted P Value
Open vs. Center	-10.92	-32.00 to 10.15	No	ns	0.359	A-B			Open vs. Center	9.656	-13.12 to 32.43	No	ns	0.4913	A-B
Open vs. Closed	-129.7	-177.8 to -81.64	Yes	****	<0.0001	A-C			Open vs. Closed	-121.1	-172.3 to -70.00	Yes	***	0.0003	A-C
Center vs. Closed	-118.8	-163.9 to -73.68	Yes	***	0.0001	B-C			Center vs. Closed	-130.8	-166.7 to -94.95	Yes	****	<0.0001	B-C
Test details	Mean 1	Mean 2	Mean Diff.	SE of diff.	n1	n2	q	DF	Test details	Mean 1	Mean 2	Mean Diff.	SE of diff.	n1	n2	q	DF
Open vs. Center	52.97	63.9	-10.92	7.547	10	10	2.047	9	Open vs. Center	62.71	53.05	9.656	8.158	10	10	1.674	9
Open vs. Closed	52.97	182.7	-129.7	17.22	10	10	10.65	9	Open vs. Closed	62.71	183.9	-121.1	18.32	10	10	9.352	9
Center vs. Closed	63.9	182.7	-118.8	16.16	10	10	10.4	9	Center vs. Closed	53.05	183.9	-130.8	12.84	10	10	14.41	9

## Sheet: RM ANOVA SUPPL2N
	Figure 1 suppl 2N
	Two-way RM ANOVA	Matching: Stacked
	Assume sphericity?	Yes
	Alpha	0.05
	Source of Variation	% of total variation	P value	P value summary	Significant?
	Chamber x House condition	0.1009	0.8742	ns	No
	Chamber	13.18	0.0829	ns	No
	House condition	0.8817	0.3243	ns	No
	Subject	15.45	0.9988	ns	No
	ANOVA table	SS	DF	MS	F (DFn, DFd)	P value
	Chamber x House condition	335.2	1	335.2	F (1, 18) = 0.02581	P=0.8742
	Chamber	43798	1	43798	F (1, 18) = 3.372	P=0.0829
	House condition	2929	1	2929	F (1, 18) = 1.027	P=0.3243
	Subject	51332	18	2852	F (18, 18) = 0.2195	P=0.9988
	Residual	233819	18	12990
	Difference between row means
	Mean of non-social chamber	352.4
	Mean of social chamber	286.2
	Difference between means	66.18
	SE of difference	36.04
	95% CI of difference	-9.541 to 141.9
	Difference between column means
	Mean of Grouped	310.8
	Mean of Isolated	327.9
	Difference between means	-17.12
	SE of difference	16.89
	95% CI of difference	-52.59 to 18.36
	Interaction CI
	Mean diff, A1 - B1	-11.33
	Mean diff, A2 - B2	-22.91
	(A1 -B1) - (A2 - B2)	11.58
	95% CI of difference	-139.9 to 163.0
	(B1 - A1) - (B2 - A2)	-11.58
	95% CI of difference	-163.0 to 139.9
	Data summary
	Number of columns (House condition)	2
	Number of rows (Chamber)	2
	Number of subjects (Subject)	20
	Number of missing values	0

## Sheet: RM ANOVA SUPPL2O
		Figure 1 suppl 2O
		Two-way RM ANOVA	Matching: Stacked
		Assume sphericity?	Yes
		Alpha	0.05
		Source of Variation	% of total variation	P value	P value summary	Significant?
		Chamber x House condition	3.301	0.273	ns	No
		Chamber	38.03	0.0012	**	Yes
		House condition	0.1219	0.6749	ns	No
		Subject	12.07	0.9968	ns	No
		ANOVA table	SS	DF	MS	F (DFn, DFd)	P value
		Chamber x House condition	5099	1	5099	F (1, 18) = 1.279	P=0.2730
		Chamber	58752	1	58752	F (1, 18) = 14.73	P=0.0012
		House condition	188.4	1	188.4	F (1, 18) = 0.1818	P=0.6749
		Subject	18651	18	1036	F (18, 18) = 0.2598	P=0.9968
		Residual	71782	18	3988
		Difference between row means
		Mean of non-social chamber	307.8
		Mean of social chamber	384.4
		Difference between means	-76.65
		SE of difference	19.97
		95% CI of difference	-118.6 to -34.70
		Difference between column means
		Mean of Grouped	343.9
		Mean of Isolated	348.3
		Difference between means	-4.34
		SE of difference	10.18
		95% CI of difference	-25.73 to 17.05
		Interaction CI
		Mean diff, A1 - B1	18.24
		Mean diff, A2 - B2	-26.92
		(A1 -B1) - (A2 - B2)	45.16
		95% CI of difference	-38.75 to 129.1
		(B1 - A1) - (B2 - A2)	-45.16
		95% CI of difference	-129.1 to 38.75
		Data summary
		Number of columns (House condition)	2
		Number of rows (Chamber)	2
		Number of subjects (Subject)	20
		Number of missing values	0

## Sheet: RM ANOVA SUPPL2P
		Figure 1 suppl 2P
		Two-way RM ANOVA	Matching: Stacked
		Assume sphericity?	Yes
		Alpha	0.05
		Source of Variation	% of total variation	P value	P value summary	Significant?
		Time x House condition	0.01502	0.9067	ns	No
		Time	35.93	<0.0001	****	Yes
		House condition	2.313	0.3361	ns	No
		Subject	42.62	0.049	*	Yes
		ANOVA table	SS	DF	MS	F (DFn, DFd)	P value
		Time x House condition	40.3	1	40.3	F (1, 18) = 0.01413	P=0.9067
		Time	96418	1	96418	F (1, 18) = 33.81	P<0.0001
		House condition	6206	1	6206	F (1, 18) = 0.9767	P=0.3361
		Subject	114377	18	6354	F (18, 18) = 2.228	P=0.0490
		Residual	51334	18	2852
		Difference between row means
		Mean of Pre-test	286.2
		Mean of Post-test	384.4
		Difference between means	-98.19
		SE of difference	16.89
		95% CI of difference	-133.7 to -62.71
		Difference between column means
		Mean of Grouped	322.9
		Mean of isolated	347.8
		Difference between means	-24.91
		SE of difference	25.21
		95% CI of difference	-77.87 to 28.05
		Interaction CI
		Mean diff, A1 - B1	-22.91
		Mean diff, A2 - B2	-26.92
		(A1 -B1) - (A2 - B2)	4.015
		95% CI of difference	-66.94 to 74.97
		(B1 - A1) - (B2 - A2)	-4.015
		95% CI of difference	-74.97 to 66.94
		Data summary
		Number of columns (House condition)	2
		Number of rows (Time)	2
		Number of subjects (Subject)	20
		Number of missing values	0
