# Supplementary material for: Oxytocin neurons mediate the effect of social isolation via the VTA circuits
Source: eLife. 2022 Apr 22;11:e73421. doi: 10.7554/eLife.73421 (PMC9075949; doi:10.7554/eLife.73421)
Supplement: Figure 1—figure supplement 3—source data 1. [file elife-73421-fig1-figsupp3-data1.xlsx]

## Sheet: FIGURE 1 - SUPPLEMENT 3
	Figure 1-Suppl 3C				Figure 1-Suppl 3C
	GROUPED	ADULT ISO			GROUPED	ADULT ISO
	83	81.2			12.6	17.4
	123.4	60.7			25.2	16.3
	65	70.8			20.8	30.7
	69.2	46.3			16.6	14.9
	104.8	47.4			14.6	25
	53.3	63.1			21.6	22.3
	111.3	84			16.3	22.8
	58	63.8			16.6	23.2
	145.9	31.7			11	17.9
	122.7	84.6			23.7	77.3	OUTLIER IDENTIFIED WITH ROUT Q METHOD
	67.9				14.6
	57.5				13.1
	Figure 1-Suppl 3F
	GROUPED										ISOLATED
OBJECT	127.4	82.1	109.6	118.1	147.1	127.3	92	148.2	124.8	132.5	144.7	133.2	94.2	163.9	91.4	127.8	115.1	148.8	108.7	104
STIMULUS 1	233.6	211.5	260.6	198.9	170	185.7	142.2	148	171.1	239.1	192.8	215.7	214.9	178.5	244.3	116.5	214.6	205	123.1	200.6
	Figure 1-Suppl 3G
	GROUPED										ISOLATED
OBJECT	195.1	157.5	202.7	227.2	243.8	244.5	206.1	265.3	224.6	230.7	231.6	251.3	202.5	261.7	189.2	286.1	193.7	250.9	211	229.6
CENTER	59.8	104.4	92.3	103.8	102.7	115.6	102.7	100.4	116	77.4	112.4	56.7	115.5	68.4	58	96.2	71.9	76.9	118.3	65.1
STIMULUS 1	355.2	348.2	315.1	279	263.5	249.9	301.3	244.3	269.4	301.9	266	302	292.1	279.8	362.8	227.7	344.5	282.3	280.7	315.3
	Figure 1-Suppl 3H
	GROUPED										ISOLATED
OBJECT	0.352909	0.279632	0.296056	0.372555	0.463892	0.406709	0.392827	0.500338	0.421764	0.356566	0.428741	0.381771	0.304756	0.47868	0.272267	0.523127	0.349105	0.420577	0.468939	0.341431
STIMULUS 1	0.647091	0.720368	0.703944	0.627445	0.536108	0.593291	0.607173	0.499662	0.578236	0.643434	0.571259	0.618229	0.695244	0.52132	0.727733	0.476873	0.650895	0.579423	0.531061	0.658569
	Figure 1-Suppl 3I
	GROUPED										ISOLATED
STIMULUS 1	150.1	107	133.8	150.7	103.1	99.9	54	75	88.7	121.1	122.3	132.5	78	108.1	114	75.1	144.3	110	85.7	72.7
STIMULUS 2	220.8	168.3	147.4	159.5	189.1	177.6	147.4	162.4	220.2	123.5	200.9	131.5	142.4	152.1	208.2	106	151.2	222.5	154.4	148.4
	Figure 1-Suppl 3J
	GROUPED										ISOLATED
STIMULUS 1	263.9	190	233.8	230	182.8	163.7	190.9	200.9	167.8	189.3	175.1	213.5	192.8	219	216	174.2	293	229.5	233.2	193.3
CENTER	50.4	184.5	111.1	143.4	125.9	124.1	142.5	119.6	119.9	59.2	98.3	81.4	128.4	114	63.9	152.7	95.9	78.8	91.3	168.8
STIMULUS 2	295.6	235.5	265.1	236.6	301.3	322.2	276.6	289.5	322.3	361.5	336.6	315.1	288.8	277	330.1	283	221.1	301.7	285.6	247.9
	Figure 1-Suppl 3K
	GROUPED										ISOLATED
STIMULUS 1	0.404691	0.388667	0.475818	0.485816	0.352841	0.36	0.268123	0.315922	0.287148	0.495094	0.378403	0.501894	0.353902	0.41545	0.353818	0.414688	0.488325	0.330827	0.356935	0.32881
STIMULUS 2	0.595309	0.611333	0.524182	0.514184	0.647159	0.64	0.731877	0.684078	0.712852	0.504906	0.621597	0.498106	0.646098	0.58455	0.646182	0.585312	0.511675	0.669173	0.643065	0.67119
	Figure 1-Suppl 3L
	GROUPED										ISOLATED
SOCIAL PREF	29.437	28.973	29.679	36.535	43.128	36.66	30.82	33.832	29.414	30.741	49.004	38.144	41.509	35.27	38.559	37.564	41.987	32.37	38.459	47.363
SOCIAL NOVELTY	25.357	28.725	25.95	32.607	36.3	31.005	24.025	27.318	25.243	20.307	33.668	28.717	29.188	26.726	31.553	27.477	36.04	32.579	36.654	37.922

## Sheet: Statistical analysis
	FIGURE1-SUPPL 3C			FIGURE1-SUPPL 3D				Figure 1 SUPPL3F
	Unpaired t test			Unpaired t test				GROUPED		ISOLATED
	P value	0.0369		P value	0.0761			Paired t test		Paired t test
	P value summary	*		P value summary	ns			P value	0.0008	P value	0.0027
	Significantly different (P < 0.05)?	Yes		Significantly different (P < 0.05)?	No			P value summary	***	P value summary	**
	One- or two-tailed P value?	Two-tailed		One- or two-tailed P value?	Two-tailed			Significantly different (P < 0.05)?	Yes	Significantly different (P < 0.05)?	Yes
	t, df	t=2.237, df=20		t, df	t=1.876, df=19			One- or two-tailed P value?	Two-tailed	One- or two-tailed P value?	Two-tailed
								t, df	t=4.941, df=9	t, df	t=4.082, df=9
	How big is the difference?			How big is the difference?				Number of pairs	10	Number of pairs	10
	Mean of column A	88.5		Mean of column A	17.23
	Mean of column B	63.36		Mean of column B	21.17			How big is the difference?		How big is the difference?
	Difference between means (B - A) ± SEM	-25.14 ± 11.24		Difference between means (B - A) ± SEM	3.942 ± 2.101			Mean of differences (B - A)	75.16	Mean of differences (B - A)	67.42
	95% confidence interval	-48.59 to -1.692		95% confidence interval	-0.4567 to 8.340			SD of differences	48.1	SD of differences	52.23
	R squared (eta squared)	0.2001		R squared (eta squared)	0.1562			SEM of differences	15.21	SEM of differences	16.52
								95% confidence interval	40.75 to 109.6	95% confidence interval	30.06 to 104.8
	F test to compare variances			F test to compare variances				R squared (partial eta squared)	0.7307	R squared (partial eta squared)	0.6493
	F, DFn, Dfd	3.201, 11, 9		F, DFn, Dfd	1.204, 8, 11
	P value	0.0915		P value	0.7552			How effective was the pairing?		How effective was the pairing?
	P value summary	ns		P value summary	ns			Correlation coefficient (r)	-0.1553	Correlation coefficient (r)	-0.2195
	Significantly different (P < 0.05)?	No		Significantly different (P < 0.05)?	No			P value (one tailed)	0.3342	P value (one tailed)	0.2711
								P value summary	ns	P value summary	ns
	Data analyzed			Data analyzed				Was the pairing significantly effective?	No	Was the pairing significantly effective?	No
	Sample size, column A	12		Sample size, column A	12
	Sample size, column B	10		Sample size, column B	9			Figure 1 SUPPL3I
								GROUPED		ISOLATED
								Paired t test		Paired t test
								P value	0.0011	P value	0.0008
								P value summary	**	P value summary	***
	FIGURE1 - SUPPL 1F							Significantly different (P < 0.05)?	Yes	Significantly different (P < 0.05)?	Yes
		GROUPED		ISOLATED				One- or two-tailed P value?	Two-tailed	One- or two-tailed P value?	Two-tailed
		Object	Stimulus 1	Object	Stimulus 1			t, df	t=4.736, df=9	t, df	t=4.939, df=9
	Theoretical mean	0.5	0.5	0.5	0.5			Number of pairs	10	Number of pairs	10
	Actual mean	0.3843	0.6157	0.3969	0.6031
	Number of values	10	10	10	10			How big is the difference?		How big is the difference?
								Mean of differences (B - A)	63.28	Mean of differences (B - A)	57.49
	One sample t test							SD of differences	42.25	SD of differences	36.81
	t, df	t=5.329, df=9	t=5.329, df=9	t=4.026, df=9	t=4.026, df=9			SEM of differences	13.36	SEM of differences	11.64
	P value (two tailed)	0.0005	0.0005	0.003	0.003			95% confidence interval	33.05 to 93.51	95% confidence interval	31.16 to 83.82
	P value summary	***	***	**	**			R squared (partial eta squared)	0.7136	R squared (partial eta squared)	0.7305
	Significant (alpha=0.05)?	Yes	Yes	Yes	Yes
								How effective was the pairing?		How effective was the pairing?
	How big is the discrepancy?							Correlation coefficient (r)	0.09481	Correlation coefficient (r)	0.3443
	Discrepancy	-0.1157	0.1157	-0.1031	0.1031			P value (one tailed)	0.3972	P value (one tailed)	0.165
	SD of discrepancy	0.06863	0.06863	0.08095	0.08095			P value summary	ns	P value summary	ns
	SEM of discrepancy	0.0217	0.0217	0.0256	0.0256			Was the pairing significantly effective?	No	Was the pairing significantly effective?	No
	95% confidence interval	-0.1648 to -0.06657	0.06657 to 0.1648	-0.1610 to -0.04515	0.04515 to 0.1610
	R squared (partial eta squared)	0.7594	0.7594	0.643	0.643
								FIGURE1-SUPPL 3L
								SOCIAL PREFERENCE		SOCIAL NOVELTY
	FIGURE1 - SUPPL 3K							Mann Whitney test		Unpaired t test
		GROUPED		ISOLATED				P value	0.0039	P value	0.0364
		Object	Stimulus 1	Object	Stimulus 1			Exact or approximate P value?	Exact	P value summary	*
	Theoretical mean	0.5	0.5	0.5	0.5			P value summary	**	Significantly different (P < 0.05)?	Yes
	Actual mean	0.3834	0.6166	0.3923	0.6077			Significantly different (P < 0.05)?	Yes	One- or two-tailed P value?	Two-tailed
	Number of values	10	10	10	10			One- or two-tailed P value?	Two-tailed	t, df	t=2.260, df=18
								Sum of ranks in column A,B	68 , 142
	One sample t test							Mann-Whitney U	13	How big is the difference?
	t, df	t=4.494, df=9	t=4.494, df=9	t=5.502, df=9	t=5.503, df=9					Mean of column C	27.68
	P value (two tailed)	0.0015	0.0015	0.0004	0.0004			Difference between medians		Mean of column D	32.05
	P value summary	**	**	***	***			Median of column A	30.78, n=10	Difference between means (D - C) ± SEM	4.369 ± 1.933
	Significant (alpha=0.05)?	Yes	Yes	Yes	Yes			Median of column B	38.51, n=10	95% confidence interval	0.3081 to 8.429
								Difference: Actual	7.729	R squared (eta squared)	0.2211
	How big is the discrepancy?							Difference: Hodges-Lehmann	7.698
	Discrepancy	-0.1166	0.1166	-0.1077	0.1077					F test to compare variances
	SD of discrepancy	0.08205	0.08205	0.0619	0.0619					F, DFn, Dfd	1.346, 9, 9
	SEM of discrepancy	0.02595	0.02595	0.01957	0.01957					P value	0.6651
	95% confidence interval	-0.1753 to -0.05791	0.05791 to 0.1753	-0.1520 to -0.06342	0.06343 to 0.1520					P value summary	ns
	R squared (partial eta squared)	0.6917	0.6917	0.7708	0.7709					Significantly different (P < 0.05)?	No
										Data analyzed
										Sample size, column C	10
										Sample size, column D	10

## Sheet: RM-ANOVA SUPPL 3F
		FIGURE1-SUPPL 3F
		Two-way RM ANOVA	Matching: Stacked
		Assume sphericity?	Yes
		Alpha	0.05
		Source of Variation	% of total variation	P value	P value summary	Significant?
		Target x House condition	0.1664	0.7343	ns	No
		Target	56.46	<0.0001	****	Yes
		House condition	0.02844	0.8684	ns	No
		Subject	18.14	0.754	ns	No
		ANOVA table	SS	DF	MS	F (DFn, DFd)	P value
		Target x House condition	149.8	1	149.8	F (1, 18) = 0.1188	P=0.7343
		Target	50823	1	50823	F (1, 18) = 40.32	P<0.0001
		House condition	25.6	1	25.6	F (1, 18) = 0.02823	P=0.8684
		Subject	16325	18	906.9	F (18, 18) = 0.7196	P=0.7540
		Residual	22688	18	1260
		Difference between row means
		Mean of Object	122
		Mean of Stimulus 1	193.3
		Difference between means	-71.29
		SE of difference	11.23
		95% CI of difference	-94.88 to -47.70
		Difference between column means
		Mean of Grouped	158.5
		Mean of Isolated	156.9
		Difference between means	1.6
		SE of difference	9.523
		95% CI of difference	-18.41 to 21.61
		Interaction CI
		Mean diff, A1 - B1	-2.27
		Mean diff, A2 - B2	5.47
		(A1 -B1) - (A2 - B2)	-7.74
		95% CI of difference	-54.91 to 39.43
		(B1 - A1) - (B2 - A2)	7.74
		95% CI of difference	-39.43 to 54.91
		Data summary
		Number of columns (House condition)	2
		Number of rows (Target)	2
		Number of subjects (Subject)	20
		Number of missing values	0

## Sheet: RM-ANOVA SUPPL 3I
		FIGURE1-SUPPL 3I
		Two-way RM ANOVA	Matching: Stacked
		Assume sphericity?	Yes
		Alpha	0.05
		Source of Variation	% of total variation	P value	P value summary	Significant?
		Target x House condition	0.1152	0.7476	ns	No
		Target	50.12	<0.0001	****	Yes
		House condition	0.6668	0.5328	ns	No
		Subject	29.67	0.1886	ns	No
		ANOVA table	SS	DF	MS	F (DFn, DFd)	P value
		Target x House condition	83.81	1	83.81	F (1, 18) = 0.1068	P=0.7476
		Target	36463	1	36463	F (1, 18) = 46.45	P<0.0001
		House condition	485.1	1	485.1	F (1, 18) = 0.4045	P=0.5328
		Subject	21585	18	1199	F (18, 18) = 1.527	P=0.1886
		Residual	14131	18	785.1
		Difference between row means
		Mean of Stimulus 1	106.3
		Mean of Stimulus 2	166.7
		Difference between means	-60.39
		SE of difference	8.86
		95% CI of difference	-79.00 to -41.77
		Difference between column means
		Mean of Grouped	140
		Mean of Isolated	133
		Difference between means	6.965
		SE of difference	10.95
		95% CI of difference	-16.04 to 29.97
		Interaction CI
		Mean diff, A1 - B1	4.07
		Mean diff, A2 - B2	9.86
		(A1 -B1) - (A2 - B2)	-5.79
		95% CI of difference	-43.02 to 31.44
		(B1 - A1) - (B2 - A2)	5.79
		95% CI of difference	-31.44 to 43.02
		Data summary
		Number of columns (House condition)	2
		Number of rows (Target)	2
		Number of subjects (Subject)	20
		Number of missing values	0

## Sheet: RM-ANOVA SUPPL3G
	FIGURE1-SUPPL 3G
	Two-way RM ANOVA	Matching: Stacked
	Assume sphericity?	No
	Alpha	0.05
	Source of Variation	% of total variation	P value	P value summary	Significant?	Geisser-Greenhouse's epsilon
	Chamber x House condition	0.3236	0.5903	ns	No
	Chamber	88.79	<0.0001	****	Yes	0.7206
	House condition	1.384e-07	0.4486	ns	No
	Subject	4.151e-06	>0.9999	ns	No
	ANOVA table	SS	DF	MS	F (DFn, DFd)	P value
	Chamber x House condition	1559	2	779.5	F (2, 36) = 0.5349	P=0.5903
	Chamber	427814	2	213907	F (1.441, 25.94) = 146.8	P<0.0001
	House condition	0.0006667	1	0.0006667	F (1, 18) = 0.6000	P=0.4486
	Subject	0.02	18	0.001111	F (18, 36) = 7.624e-007	P>0.9999
	Residual	52465	36	1457
	Difference between column means
	Mean of Grouped	203.3
	Mean of Isolated	203.3
	Difference between means	0.006667
	SE of difference	0.008607
	95% CI of difference	-0.01142 to 0.02475
	Data summary
	Number of columns (House condition)	2
	Number of rows (Chamber)	3
	Number of subjects (Subject)	20
	Number of missing values	0

## Sheet: RM-ANOVA SUPPL3J
		FIGURE1-SUPPL 3J
		Two-way RM ANOVA	Matching: Stacked
		Assume sphericity?	No
		Alpha	0.05
		Source of Variation	% of total variation	P value	P value summary	Significant?	Geisser-Greenhouse's epsilon
		Chamber x House condition	0.3623	0.6986	ns	No
		Chamber	81.63	<0.0001	****	Yes	0.9808
		House condition	4.338e-08	0.5843	ns	No
		Subject	2.516e-06	>0.9999	ns	No
		ANOVA table	SS	DF	MS	F (DFn, DFd)	P value
		Chamber x House condition	1392	2	696.1	F (2, 36) = 0.3622	P=0.6986
		Chamber	313669	2	156834	F (1.962, 35.31) = 81.61	P<0.0001
		House condition	0.0001667	1	0.0001667	F (1, 18) = 0.3103	P=0.5843
		Subject	0.009667	18	0.000537	F (18, 36) = 2.795e-007	P>0.9999
		Residual	69183	36	1922
		Difference between column means
		Mean of Grouped	203.3
		Mean of Isolated	203.3
		Difference between means	-0.003333
		SE of difference	0.005984
		95% CI of difference	-0.01590 to 0.009238
		Data summary
		Number of columns (House condition)	2
		Number of rows (Chamber)	3
		Number of subjects (Subject)	20
		Number of missing values	0
