# Supplementary material for: Oxytocin neurons mediate the effect of social isolation via the VTA circuits
Source: eLife. 2022 Apr 22;11:e73421. doi: 10.7554/eLife.73421 (PMC9075949; doi:10.7554/eLife.73421)
Supplement: Figure 1—source data 1. [file elife-73421-fig1-data1.xlsx]

## Sheet: FIGURE 1 - souce data
	Figure 1C			Figure 1D			Figure 1F			Figure 1H					Figure 1I					Figure 1K							Figure 1M			Figure 1N
	GROUPED	ISOLATED		GROUPED	ISOLATED		GROUPED	ISOLATED		GROUPED		ISOLATED			GROUPED		ISOLATED			GROUPED	ISOLATED						Day 1	Day 4		Day 1	Day 4
	97.1	140.4		37.3	24.6		41.01	104.94*		OBJECT	STIMULUS 1	OBJECT	STIMULUS 1		STIMULUS 1	STIMULUS 2	STIMULUS 1	STIMULUS 2		144	135						144.3	81		135	189
	105.8	149.9		15.6	30.1		31.86	59.28		76.6	241.1	103.1	251.8		131.2	179.9	204.4	135.7		68.22	162						68.22	36		162	180.05
	90.1	140		15.8	20.3		35.64	65.01		107.6	208.7	137.2	204.5		116.7	167.6	143.7	214		153	279						152.7	108		279	287.95
	116.8	174.5		13.3	20.2		34.26	67.86		130.4	155.8	85.8	130		85	164.4	103	99.5		162	259.2						162.1	54		259.2	189
	101.1	96.5		46.7	14.3		45.84	56.82		155.3	125.9	83.4	303.5		58.9	87.9	134.7	109		99	252						151.9	97		252	144
	123.8	94.9		21.3	33.6		30.45	54.51		139.9	188.8	98	228.5		186.5	185.6	70.8	229.2		162	225						163	77.6		225	225
	97.8	127		15.1	21.6		39.42	54.75		132.2	145.8	140	205		76.8	131.6	196.6	94.8
	62.4	206.2		6.7	23.2		48.27	69.7		102.7	157.4	137.1	119.8		90.9	166.3	114.6	114.7
	106	160.5		16.4	14					112.9	126	126.4	191.4		86.8	119.2	148	127.7
	91.5	180.2		12.6	16.7					83.9	191.1	103.6	282.3		98.7	184.2	86	195.3
										68.1	150.9	108	138.9		74.4	93.1	96.2	186.4
										69	165.3	98.8	253.1		56.6	109.6	151.1	139.3
							104.94*	outliers		105.6	269	74.2	314.2		148.5	145	133.7	78.2
										125.6	328.2	140	294.4		107.6	234.8	239.4	139
										152.4	191.4	127	171.6		88.4	186.6	160.4	150.4
										108.2	162.6	80.2	342		81.2	226.6	143.4	130
										172	136	110.2	282.2		120.2	230	151.4	164
	Figure 1L - RAW data													Figure 1L -plotted data (normalized)
	Grouped						Isolated							140.37	mean grouped trial 1					218.7	mean isolated trial 1
DAY 1	144.3	68.22	152.7	162.1	151.9	163	135	162	279	259.2	252	225		102.8	48.6001	108.784	115.481	108.214	116.122	61.7284	74.0741	127.572	118.519	115.226	102.881
DAY 2	143.1	105.03	139.68	112.86	99.05	98.95	99	117	270	180	184.23	248.4		101.945	74.8237	99.5084	80.4018	70.5635	70.4923	45.2675	53.4979	123.457	82.3045	84.2387	113.58
DAY 3	90	45	162	89.5	126.5	99	180	162	268	173	171	207		64.1163	32.0581	115.409	63.7601	90.119	70.5279	82.3045	74.0741	122.542	79.1038	78.1893	94.6502
DAY 4	81	36	108	54	97	77.6	189	180.05	287.95	189	144	225		57.7046	25.6465	76.9395	38.4698	69.1031	55.2825	86.4198	82.3274	131.664	86.4198	65.8436	102.881
		Figure 1M			Figure 1N
		GROUPED			ISOLATED
		DAY 1	DAY 4		DAY 1	DAY 4
		144.3	81		135	189
		68.22	36		162	180.05
		152.7	108		279	287.95
		162.1	54		259.2	189
		151.9	97		252	144
		163	77.6		225	225

## Sheet: Statistical analysis
							Figure 1H
	Figure 1C			Figure 1D			GROUPED		ISOLATED
	Unpaired t test			Mann Whitney test			Wilcoxon matched-pairs signed rank test		Paired t test
	P value	0.0012		P value	0.2176		P value	0.001	P value	<0.0001
	P value summary	**		Exact or approximate P value?	Exact		Exact or approximate P value?	Exact	P value summary	****
	Significantly different (P < 0.05)?	Yes		P value summary	ns		P value summary	**	Significantly different (P < 0.05)?	Yes
	One- or two-tailed P value?	Two-tailed		Significantly different (P < 0.05)?	No		Significantly different (P < 0.05)?	Yes	One- or two-tailed P value?	Two-tailed
	t, df	t=3.855, df=18		One- or two-tailed P value?	Two-tailed		One- or two-tailed P value?	Two-tailed	t, df	t=5.975, df=15
	How big is the difference?			Sum of ranks in column A,B	88 , 122		Sum of positive, negative ranks	127.0 , -9.000	Number of pairs	16
	Mean of column A	99.24		Mann-Whitney U	33		Sum of signed ranks (W)	118
	Mean of column B	147		Difference between medians			Number of pairs	16	How big is the difference?
	Difference between means (B - A) ± SEM	47.77 ± 12.39		Median of column A	15.70, n=10		Number of ties (ignored)	0	Mean of differences (D - C)	122.5
	95% confidence interval	21.73 to 73.81		Median of column B	20.95, n=10				SD of differences	82.02
	R squared (eta squared)	0.4522		Difference: Actual	5.25		Median of differences		SEM of differences	20.51
	F test to compare variances			Difference: Hodges-Lehmann	4.55		Median	54.55	95% confidence interval	78.81 to 166.2
	F, DFn, Dfd	4.505, 9, 9							R squared (partial eta squared)	0.7041
	P value	0.0352					How effective was the pairing?
	P value summary	*		Figure 1F			rs (Spearman)	-0.3353	How effective was the pairing?
	Significantly different (P < 0.05)?	Yes		Unpaired t test			P value (one tailed)	0.1021	Correlation coefficient (r)	-0.4479
	Data analyzed			P value	<0.0001		P value summary	ns	P value (one tailed)	0.0409
	Sample size, column A	10		P value summary	****		Was the pairing significantly effective?	No	P value summary	*
	Sample size, column B	10		Significantly different (P < 0.05)?	Yes				Was the pairing significantly effective?	Yes
	Mann Whitney test			One- or two-tailed P value?	Two-tailed
	P value	0.0052		t, df	t=6.885, df=13
	Exact or approximate P value?	Exact		How big is the difference?			Figure 1I
	P value summary	**		Mean of column A	38.34		GROUPED		ISOLATED
	Significantly different (P < 0.05)?	Yes		Mean of column B	61.13		Paired t test		Paired t test
	One- or two-tailed P value?	Two-tailed		Difference between means (B - A) ± SEM	22.79 ± 3.310		P value	<0.0001	P value	0.9201
	Sum of ranks in column A,B	69 , 141		95% confidence interval	15.64 to 29.94		P value summary	****	P value summary	ns
	Mann-Whitney U	14		R squared (eta squared)	0.7848		Significantly different (P < 0.05)?	Yes	Significantly different (P < 0.05)?	No
	Difference between medians			F test to compare variances			One- or two-tailed P value?	Two-tailed	One- or two-tailed P value?	Two-tailed
	Median of column A	99.45, n=10		F, DFn, Dfd	1.039, 7, 6		t, df	t=5.774, df=15	t, df	t=0.1020, df=15
	Median of column B	145.2, n=10		P value	0.979		Number of pairs	16	Number of pairs	16
	Difference: Actual	45.7		P value summary	ns
	Difference: Hodges-Lehmann	48.65		Significantly different (P < 0.05)?	No		How big is the difference?		How big is the difference?
				Data analyzed			Mean of differences (B - A)	62.75	Mean of differences (D - C)	1.863
				Sample size, column A	8		SD of differences	43.47	SD of differences	73.01
				Sample size, column B	7		SEM of differences	10.87	SEM of differences	18.25
							95% confidence interval	39.59 to 85.91	95% confidence interval	-37.04 to 40.77
							R squared (partial eta squared)	0.6897	R squared (partial eta squared)	0.0006936
	Figure 1K
	Unpaired t test						How effective was the pairing?		How effective was the pairing?
	P value	0.0117					Correlation coefficient (r)	0.447	Correlation coefficient (r)	-0.3781
	P value summary	*					P value (one tailed)	0.0413	P value (one tailed)	0.0744
	Significantly different (P < 0.05)?	Yes					P value summary	*	P value summary	ns
	One- or two-tailed P value?	Two-tailed					Was the pairing significantly effective?	Yes	Was the pairing significantly effective?	No
	t, df	t=3.076, df=10
	How big is the difference?
	Mean of column A	131.4
	Mean of column B	218.7
	Difference between means (B - A) ± SEM	87.33 ± 28.39
	95% confidence interval	24.07 to 150.6
	R squared (eta squared)	0.4861
	F test to compare variances
	F, DFn, Dfd	2.208, 5, 5
	P value	0.4051
	P value summary	ns
	Significantly different (P < 0.05)?	No
	Data analyzed
	Sample size, column A	6
	Sample size, column B	6
	Figure 1M			Figure 1N
	Paired t test			Paired t test
	P value	0.0023		P value	0.5413
	P value summary	**		P value summary	ns
	Significantly different (P < 0.05)?	Yes		Significantly different (P < 0.05)?	No
	One- or two-tailed P value?	Two-tailed		One- or two-tailed P value?	Two-tailed
	t, df	t=5.706, df=5		t, df	t=0.6552, df=5
	Number of pairs	6		Number of pairs	6
	How big is the difference?			How big is the difference?
	Mean of differences (B - A)	-64.77		Mean of differences (B - A)	-16.2
	SD of differences	27.8		SD of differences	60.56
	SEM of differences	11.35		SEM of differences	24.72
	95% confidence interval	-93.95 to -35.59		95% confidence interval	-79.76 to 47.36
	R squared (partial eta squared)	0.8669		R squared (partial eta squared)	0.07907
	How effective was the pairing?			How effective was the pairing?
	Correlation coefficient (r)	0.6436		Correlation coefficient (r)	0.3666
	P value (one tailed)	0.0839		P value (one tailed)	0.2374
	P value summary	ns		P value summary	ns
	Was the pairing significantly effective?	No		Was the pairing significantly effective?	No

## Sheet: 2-way RM ANOVA - Fig 1 H
FIGURE 1 H
Two-way RM ANOVA	Matching: Stacked
Assume sphericity?	Yes
Alpha	0.05
Source of Variation	% of total variation	P value	P value summary	Significant?
Target x House condition	3.769	0.0533	ns	No
Target	47.92	<0.0001	****	Yes
House condition	2.362	0.0565	ns	No
Subject	18.01	0.8824	ns	No
ANOVA table	SS	DF	MS	F (DFn, DFd)	P value
Target x House condition	11519	1	11519	F (1, 30) = 4.048	P=0.0533
Target	146478	1	146478	F (1, 30) = 51.47	P<0.0001
House condition	7221	1	7221	F (1, 30) = 3.935	P=0.0565
Subject	55050	30	1835	F (30, 30) = 0.6448	P=0.8824
Residual	85374	30	2846
Difference between row means
Mean of Object	112.4
Mean of Stimulus 1	208
Difference between means	-95.68
SE of difference	13.34
95% CI of difference	-122.9 to -68.44
Difference between column means
Mean of Grouped	149.6
Mean of Isolated	170.8
Difference between means	-21.24
SE of difference	10.71
95% CI of difference	-43.11 to 0.6275
Interaction CI
Mean diff, A1 - B1	5.588
Mean diff, A2 - B2	-48.08
(A1 -B1) - (A2 - B2)	53.66
95% CI of difference	-0.8110 to 108.1
(B1 - A1) - (B2 - A2)	-53.66
95% CI of difference	-108.1 to 0.8110
Data summary
Number of columns (House condition)	2
Number of rows (Target)	2
Number of subjects (Subject)	32
Number of missing values	0

## Sheet: 2-way RM ANOVA - Fig 1 I
FIGURE 1 H
Two-way RM ANOVA	Matching: Stacked
Assume sphericity?	Yes
Alpha	0.05
Source of Variation	% of total variation	P value	P value summary	Significant?
Target x House condition	10.51	0.0075	**	Yes
Target	11.84	0.0049	**	Yes
House condition	1.466	0.2892	ns	No
Subject	37.78	0.5175	ns	No
ANOVA table	SS	DF	MS	F (DFn, DFd)	P value
Target x House condition	14829	1	14829	F (1, 30) = 8.215	P=0.0075
Target	16699	1	16699	F (1, 30) = 9.251	P=0.0049
House condition	2068	1	2068	F (1, 30) = 1.164	P=0.2892
Subject	53289	30	1776	F (30, 30) = 0.9840	P=0.5175
Residual	54156	30	1805
Difference between row means
Mean of Stimulus 1	121.4
Mean of Stimulus 2	153.7
Difference between means	-32.31
SE of difference	10.62
95% CI of difference	-54.00 to -10.61
Difference between column means
Mean of Grouped	131.9
Mean of Isolated	143.3
Difference between means	-11.37
SE of difference	10.54
95% CI of difference	-32.89 to 10.15
Interaction CI
Mean diff, A1 - B1	-41.81
Mean diff, A2 - B2	19.08
(A1 -B1) - (A2 - B2)	-60.89
95% CI of difference	-104.3 to -17.50
(B1 - A1) - (B2 - A2)	60.89
95% CI of difference	17.50 to 104.3
Data summary
Number of columns (House condition)	2
Number of rows (Target)	2
Number of subjects (Subject)	32
Number of missing values	0
Bonferroni's multiple comparisons test	Mean Diff.	95.00% CI of diff.	Below threshold?	Summary	Adjusted P Value
Stimulus 1 - Stimulus 2
Grouped	-62.75	-98.19 to -27.31	Yes	***	0.0005
Isolated	-1.862	-37.31 to 33.58	No	ns	>0.9999
Test details	Mean 1	Mean 2	Mean Diff.	SE of diff.	N1	N2	t	DF
Stimulus 1 - Stimulus 2
Grouped	100.5	163.3	-62.75	15.02	16	16	4.177	30
Isolated	142.3	144.2	-1.862	15.02	16	16	0.124	30

## Sheet: 2-Way RM ANOVA - Fig1-L
FIGURE 1L
Two-way RM ANOVA	Matching: Stacked
Assume sphericity?	No
Alpha	0.05
Source of Variation	% of total variation	P value	P value summary	Significant?	Geisser-Greenhouse's epsilon
DAY x house condition	9.12	0.0117	*	Yes
DAY	14.21	0.0041	**	Yes	0.7384
house condition	7.075	0.2555	ns	No
Subject	48.63	<0.0001	****	Yes
ANOVA table	SS	DF	MS	F (DFn, DFd)	P value
DAY x house condition	2958	3	986.1	F (3, 30) = 4.349	P=0.0117
DAY	4608	3	1536	F (2.215, 22.15) = 6.775	P=0.0041
house condition	2295	1	2295	F (1, 10) = 1.455	P=0.2555
Subject	15773	10	1577	F (10, 30) = 6.958	P<0.0001
Residual	6801	30	226.7
Difference between column means
Mean of Grouped	77.37
Mean of isolated	91.2
Difference between means	-13.83
SE of difference	11.46
95% CI of difference	-39.37 to 11.72
Data summary
Number of columns (house condition)	2
Number of rows (DAY)	4
Number of subjects (Subject)	12
Number of missing values	0
Within each column, compare rows (simple effects within columns)
Number of families	2
Number of comparisons per family	6
Alpha	0.05
Tukey's multiple comparisons test	Mean Diff.	95.00% CI of diff.	Below threshold?	Summary	Adjusted P Value
Grouped
DAY1 vs. DAY2	17.04	-24.27 to 58.36	No	ns	0.4903
DAY1 vs. DAY3	27.33	-5.751 to 60.42	No	ns	0.0965
DAY1 vs. DAY4	46.14	16.31 to 75.98	Yes	**	0.0087
DAY2 vs. DAY3	10.29	-29.77 to 50.35	No	ns	0.7829
DAY2 vs. DAY4	29.1	0.5438 to 57.65	Yes	*	0.0467
DAY3 vs. DAY4	18.81	0.3147 to 37.30	Yes	*	0.047
isolated
DAY1 vs. DAY2	16.28	-9.886 to 42.44	No	ns	0.2181
DAY1 vs. DAY3	11.52	-23.12 to 46.17	No	ns	0.6383
DAY1 vs. DAY4	7.407	-34.31 to 49.12	No	ns	0.9094
DAY2 vs. DAY3	-4.753	-35.37 to 25.86	No	ns	0.9361
DAY2 vs. DAY4	-8.868	-43.15 to 25.42	No	ns	0.7795
DAY3 vs. DAY4	-4.115	-16.54 to 8.313	No	ns	0.6411
Test details	Mean 1	Mean 2	Mean Diff.	SE of diff.	N1	N2	q	DF
Grouped
DAY1 vs. DAY2	100	82.96	17.04	11.2	6	6	2.153	5
DAY1 vs. DAY3	100	72.67	27.33	8.967	6	6	4.311	5
DAY1 vs. DAY4	100	53.86	46.14	8.086	6	6	8.07	5
DAY2 vs. DAY3	82.96	72.67	10.29	10.86	6	6	1.34	5
DAY2 vs. DAY4	82.96	53.86	29.1	7.738	6	6	5.318	5
DAY3 vs. DAY4	72.67	53.86	18.81	5.012	6	6	5.307	5
isolated
DAY1 vs. DAY2	100	83.72	16.28	7.09	6	6	3.246	5
DAY1 vs. DAY3	100	88.48	11.52	9.39	6	6	1.735	5
DAY1 vs. DAY4	100	92.59	7.407	11.31	6	6	0.9266	5
DAY2 vs. DAY3	83.72	88.48	-4.753	8.298	6	6	0.8101	5
DAY2 vs. DAY4	83.72	92.59	-8.868	9.291	6	6	1.35	5
DAY3 vs. DAY4	88.48	92.59	-4.115	3.368	6	6	1.728	5
