# Supplementary material for: Oxytocin neurons mediate the effect of social isolation via the VTA circuits
Source: eLife. 2022 Apr 22;11:e73421. doi: 10.7554/eLife.73421 (PMC9075949; doi:10.7554/eLife.73421)
Supplement: Figure 2—source data 1. [file elife-73421-fig2-data1.xlsx]

## Sheet: FIGURE 2
	FIGURE 2C
	CURRENT STEP	GROUPED													ISOLATED
	0	0	0	0	0	0	0	0	0	0	0	0	0	0	0	1	0	0	0	0	0	0	1	1	0
	50	0	0	1	1	1	0	0	0	0	0	2	2	1	2	2	1	1	0	1	0	1	3	3	2
	100	0	1	1	5	1	2	0	1	0	0	3	2	1	6	4	3	3	1	2	2	2	3	4	2
	150	1	2	2	7	1	3	0	1	0	0	4	3	1	6	5	3	3	1	3	3	3	4	5	3
	200	1	4	2	4	1	4	0	2	0	0	4	4	2	4	5	5	4	2	3	3	4	7	6	3
	250	1	5	1	5	1	4	0	3	0	0	4	5	2	3	6	4	4	2	4	2	3	7	7	4
	300	1	7	1	4	1	4	1	3	1	1	4	5	2	2	6	4	3	2	5	2	4	9	9	4
		FIGURE 2D
		GROUPED	ISOLATED
		-37.6606	-34.7086
		-50.6426	-43.742
		-38.7194	-40.6544
		-36.1544	-32.5447
		-34.5427	-42.2327
		-45.6499	-37.8135
		-58.0438	-37.5201
		-32.0388	-37.9876
		-53.5764	-39.8749
		-31.7153	-40.9286
		-42.5678	-37.1047
		-42.9662
		-31.6078

## Sheet: Statistical analysis
Figure 2C
												Figure 2D
Two-way RM ANOVA	Matching: Stacked											Unpaired t test
Assume sphericity?	No											P value	0.3641
Alpha	0.05											P value summary	ns
												Significantly different (P < 0.05)?	No
Source of Variation	% of total variation	P value	P value summary	Significant?	Geisser-Greenhouse's epsilon							One- or two-tailed P value?	Two-tailed
current step x House condition	2.046	0.044	*	Yes								t, df	t=0.9268, df=22
current step	33.62	<0.0001	****	Yes	0.385
House condition	12.08	0.0097	**	Yes								How big is the difference?
Subject	33.16	<0.0001	****	Yes								Mean of column A	-41.22
												Mean of column B	-38.65
ANOVA table	SS	DF	MS	F (DFn, DFd)	P value							Difference between means (B - A) ± SEM	2.575 ± 2.779
current step x House condition	14.46	6	2.409	F (6, 132) = 2.230	P=0.0440							95% confidence interval	-3.188 to 8.339
current step	237.5	6	39.59	F (2.310, 50.82) = 36.65	P<0.0001							R squared (eta squared)	0.03758
House condition	85.36	1	85.36	F (1, 22) = 8.016	P=0.0097
Subject	234.3	22	10.65	F (22, 132) = 9.857	P<0.0001							F test to compare variances
Residual	142.6	132	1.08									F, DFn, Dfd	7.044, 12, 10
												P value	0.0042
Difference between column means												P value summary	**
Mean of GROUPED	1.582											Significantly different (P < 0.05)?	Yes
Mean of ISOLATED	3.013
Difference between means	-1.431											Data analyzed
SE of difference	0.5053											Sample size, column A	13
95% CI of difference	-2.478 to -0.3827											Sample size, column B	11
Data summary												Mann Whitney test
Number of columns (House condition)	2											P value	0.7762
Number of rows (current step)	7											Exact or approximate P value?	Exact
Number of subjects (Subject)	24											P value summary	ns
Number of missing values	0											Significantly different (P < 0.05)?	No
Compare each cell mean with the other cell mean in that row												One- or two-tailed P value?	Two-tailed
												Sum of ranks in column A,B	157 , 143
Number of families	1											Mann-Whitney U	66
Number of comparisons per family	7
Alpha	0.05											Difference between medians
												Median of column A	-38.72, n=13
Uncorrected Fisher's LSD	Mean Diff.	95.00% CI of diff.	Below threshold?	Summary	Individual P Value							Median of column B	-37.99, n=11
												Difference: Actual	0.7319
Grouped - Social												Difference: Hodges-Lehmann	0.9059
0	-0.2727	-0.5865 to 0.04107	No	ns	0.0816
50	-0.8392	-1.633 to -0.04560	Yes	*	0.0394
100	-1.601	-2.795 to -0.4076	Yes	*	0.0109
150	-1.622	-3.049 to -0.1961	Yes	*	0.0277
200	-2.028	-3.360 to -0.6956	Yes	**	0.0046
250	-1.797	-3.407 to -0.1876	Yes	*	0.0303
300	-1.853	-3.828 to 0.1213	No	ns	0.0643
Test details	Mean 1	Mean 2	Mean Diff.	SE of diff.	N1	N2	t	DF
Grouped - Social
0	0	0.2727	-0.2727	0.1408	13	11	1.936	10
50	0.6154	1.455	-0.8392	0.378	13	11	2.22	18.19
100	1.308	2.909	-1.601	0.575	13	11	2.785	21.63
150	1.923	3.545	-1.622	0.6863	13	11	2.364	21.26
200	2.154	4.182	-2.028	0.6424	13	11	3.157	21.96
250	2.385	4.182	-1.797	0.776	13	11	2.316	21.95
300	2.692	4.545	-1.853	0.9425	13	11	1.966	18.73
