# Supplementary material for: Oxytocin neurons mediate the effect of social isolation via the VTA circuits
Source: eLife. 2022 Apr 22;11:e73421. doi: 10.7554/eLife.73421 (PMC9075949; doi:10.7554/eLife.73421)
Supplement: Figure 3—figure supplement 1—source data 1. [file elife-73421-fig3-figsupp1-data1.xlsx]

## Sheet: FIGURE 3 - SUPPLEMENT 1
								D
	FIGURE 3 - SUPPLEMENT 1 B			FIGURE 3 - SUPPLEMENT 1 C			FIGURE 3 - SUPPLEMENT 1 E			FIGURE 3 - SUPPLEMENT F			FIGURE 3 - SUPPLEMENT 1 G			FIGURE 3 - SUPPLEMENT 1 H
	GROUPED	ISOLATED		GROUPED	ISOLATED		GROUPED	ISOLATED		GROUPED	ISOLATED		GROUPED	ISOLATED		GROUPED	ISOLATED
	55	79		36	122		7.00935	24.3644		30	115		0	7.40741		83.333333*	13.9344
	66	62		67	104		9.31677	13.5396		75	70		6.66667	15		17.9104	10.5769
	44	76		83	54		8.63698	7.75862		64	36		7.8125	11.1111		16.8675	12.963
	53	95		108	46		10.4634	9.57447		70	54		7.14286	7.5		21.2963	34.7826
	30	86		69	49		8.4022	7.50469		61	40		4.91803	9.09091		8.69565	32.6531
	81	112		46	189		4	20.6544		18	101		5.55556	7.84314		6.52174	23.8095
	85	81		53	63		3.56506	9.71429		20	51		10	9.09091		15.0943	55.5556
	25	85		15	60		14.8741	8.04094		65	55		3.07692	6.25		20	26.6667
	15	67		16	65		6.25	5.97015		40	44		12.5	5.71429		31.25	7.69231
	66	100		55	58		9.01639	6.50406		55	40		0	3.47826		16.3636	8.62069
	85	55		40	101		7.64526	12.0664		50	80		4	5.88235		37.5	8.91089
	82	68		44	130		6.87679	10.9536		48	85		0	4.9505		22.7273	13.8462
	FIGURE 3 - SUPPLEMENT 1K													FIGURE 3 - SUPPLEMENT 1L
CURRENT STEP	no CNO					+CNO								no CNO	CNO
0	0	0	0	0	0	0	0	0	0	0				-47	-65
10	0	4	6	4	5	0	0	0	0	0				-37	-40
20	4	7	8	6	5	0	0	2	0	0				-40	-35
30	6	10	9	8	7	0	0	4	1	0				-45	-61
40	13	12	7	8	8	0	0	3	1	0				-38	-52
50	14	13	4	7	6	0	1	3	1	0

## Sheet: Statistical analysis
	FIGURE 3 - SUPPLEMENT 1 B			FIGURE 3 - SUPPLEMENT 1 C			FIGURE 3 - SUPPLEMENT 1E			FIGURE 3 - SUPPLEMENT 1F			FIGURE 3 - SUPPLEMENT 1 G			FIGURE 3 - SUPPLEMENT 1 H
	Unpaired t test			Mann Whitney test			Mann Whitney test			Unpaired t test			Unpaired t test			Mann Whitney test
	P value	0.0124		P value	0.0344		P value	0.1277		P value	0.131		P value	0.0838		P value	0.7859
	P value summary	*		Exact or approximate P value?	Exact		Exact or approximate P value?	Exact		P value summary	ns		P value summary	ns		Exact or approximate P value?	Exact
	Significantly different (P < 0.05)?	Yes		P value summary	*		P value summary	ns		Significantly different (P < 0.05)?	No		Significantly different (P < 0.05)?	No		P value summary	ns
	One- or two-tailed P value?	Two-tailed		Significantly different (P < 0.05)?	Yes		Significantly different (P < 0.05)?	No		One- or two-tailed P value?	Two-tailed		One- or two-tailed P value?	Two-tailed		Significantly different (P < 0.05)?	No
	t, df	t=2.723, df=22		One- or two-tailed P value?	Two-tailed		One- or two-tailed P value?	Two-tailed		t, df	t=1.569, df=22		t, df	t=1.811, df=22		One- or two-tailed P value?	Two-tailed
				Sum of ranks in column A,B	113.5 , 186.5		Sum of ranks in column A,B	123 , 177								Sum of ranks in column A,B	137 , 139
	How big is the difference?			Mann-Whitney U	35.5		Mann-Whitney U	45		How big is the difference?			How big is the difference?			Mann-Whitney U	61
	Mean of column A	57.25								Mean of column A	49.67		Mean of column A	5.139
	Mean of column B	80.5		Difference between medians			Difference between medians			Mean of column B	64.25		Mean of column B	7.777		Difference between medians
	Difference between means (B - A) ± SEM	23.25 ± 8.538		Median of column A	49.50, n=12		Median of column A	8.024, n=12		Difference between means (B - A) ± SEM	14.58 ± 9.296		Difference between means (B - A) ± SEM	2.637 ± 1.456		Median of column A	17.91, n=11
	95% confidence interval	5.543 to 40.96		Median of column B	64.00, n=12		Median of column B	9.644, n=12		95% confidence interval	-4.695 to 33.86		95% confidence interval	-0.3828 to 5.657		Median of column B	13.89, n=12
	R squared (eta squared)	0.2521		Difference: Actual	14.5		Difference: Actual	1.621		R squared (eta squared)	0.1006		R squared (eta squared)	0.1297		Difference: Actual	-4.02
				Difference: Hodges-Lehmann	23.5		Difference: Hodges-Lehmann	2.193								Difference: Hodges-Lehmann	-2.28
	F test to compare variances									F test to compare variances			F test to compare variances
	F, DFn, Dfd	2.222, 11, 11								F, DFn, Dfd	1.838, 11, 11		F, DFn, Dfd	1.702, 11, 11
	P value	0.2013								P value	0.3272		P value	0.3914
	P value summary	ns								P value summary	ns		P value summary	ns
	Significantly different (P < 0.05)?	No								Significantly different (P < 0.05)?	No		Significantly different (P < 0.05)?	No
	Data analyzed									Data analyzed			Data analyzed
	Sample size, column A	12								Sample size, column A	12		Sample size, column A	12
	Sample size, column B	12								Sample size, column B	12		Sample size, column B	12
	FIGURE 3 - SUPPLEMENT 1 K			FIGURE 3 - SUPPLEMENT 1 L
	Unpaired t test			Two-way RM ANOVA	Matching: Stacked
	P value	0.1715		Assume sphericity?	Yes
	P value summary	ns		Alpha	0.05
	Significantly different (P < 0.05)?	No
	One- or two-tailed P value?	Two-tailed		Source of Variation	% of total variation	P value	P value summary	Significant?
	t, df	t=1.502, df=8		current step x cno treatment	13.37	<0.0001	****	Yes
				current step	21.23	<0.0001	****	Yes
	How big is the difference?			cno treatment	47.06	<0.0001	****	Yes
	Mean of column A	-41.4		Subject	4.176	0.1971	ns	No
	Mean of column B	-50.6
	Difference between means (B - A) ± SEM	-9.200 ± 6.125		ANOVA table	SS	DF	MS	F (DFn, DFd)	P value
	95% confidence interval	-23.33 to 4.925		current step x cno treatment	129	5	25.79	F (5, 40) = 7.556	P<0.0001
	R squared (eta squared)	0.22		current step	204.7	5	40.94	F (5, 40) = 11.99	P<0.0001
				cno treatment	453.8	1	453.8	F (1, 8) = 90.15	P<0.0001
	F test to compare variances			Subject	40.27	8	5.033	F (8, 40) = 1.475	P=0.1971
	F, DFn, Dfd	8.720, 4, 4		Residual	136.5	40	3.413
	P value	0.0591
	P value summary	ns		Difference between column means
	Significantly different (P < 0.05)?	No		Mean of Group A	6.033
				Mean of Group B	0.5333
	Data analyzed			Difference between means	5.5
	Sample size, column A	5		SE of difference	0.5793
	Sample size, column B	5		95% CI of difference	4.164 to 6.836
				Data summary
				Number of columns (cno treatment)	2
				Number of rows (current step)	6
				Number of subjects (Subject)	10
				Number of missing values	0
				Compare each cell mean with the other cell mean in that row
				Number of families	1
				Number of comparisons per family	6
				Alpha	0.05
				Uncorrected Fisher's LSD	Mean Diff.	95.00% CI of diff.	Significant?	Summary	Individual P Value
				Group A - Group B
				0	0	-2.441 to 2.441	No	ns	>0.9999
				10	3.8	1.359 to 6.241	Yes	**	0.003
				20	5.6	3.159 to 8.041	Yes	****	<0.0001
				30	7	4.559 to 9.441	Yes	****	<0.0001
				40	8.8	6.359 to 11.24	Yes	****	<0.0001
				50	7.8	5.359 to 10.24	Yes	****	<0.0001
				Test details	Mean 1	Mean 2	Mean Diff.	SE of diff.	N1	N2	t	DF
				Group A - Group B
				0	0	0	0	1.214	5	5	0	48
				10	3.8	0	3.8	1.214	5	5	3.131	48
				20	6	0.4	5.6	1.214	5	5	4.614	48
				30	8	1	7	1.214	5	5	5.767	48
				40	9.6	0.8	8.8	1.214	5	5	7.25	48
				50	8.8	1	7.8	1.214	5	5	6.426	48
