# Supplementary material for: Oxytocin neurons mediate the effect of social isolation via the VTA circuits
Source: eLife. 2022 Apr 22;11:e73421. doi: 10.7554/eLife.73421 (PMC9075949; doi:10.7554/eLife.73421)
Supplement: Figure 3—source data 1. [file elife-73421-fig3-data1.xlsx]

## Sheet: FIGURE 3
	FIGURE 3B			FIGURE 3C			FIGURE 3D				FIGURE 3G					FIGURE 3l
	GROUPED	ISOLATED		GROUPED	ISOLATED		GROUPED	ISOLATED			GROUPED	ISOLATED				ISOLATED + CNO	ISOLATED	GROUPED + CNO	GROUPED
	12.8505	16.7373		8.41121	25.8475		0	58.1967			-47	-48				-56.083	-44.5564	-48.8928	-41.3825
	8.19876	11.9923		8.32298	20.1161		19.403	51.9231			-48	-52				-43.5248	-41.2345	-53.0445	-50.8127
	5.93792	16.3793		11.2011	11.6379		21.6867	38.8889			-60	-55				-45.0359	-48.3775	-40.2437	-55.7327
	7.92227	16.844		16.1435	8.15603		16.6667	32.6087			-65	-63				-53.88	-36.7034	-40.7171	-51.5569
	4.13223	16.1351		9.50413	9.19325		24.6377	26.5306			-48	-40				-58.3353	-50.2036	-43.5408	-47.1231
	18	22.9039		10.2222	38.65030675*		6.52174	42.8571			-47	-45				-53	-55.7594	-58.8798	-53.6394
	15.1515	15.4286		9.44742	12		11.3208	15.873			-50	-60				-41.1767	-43.9776	-56.0637	-57.4121
	5.72082	12.4269		3.43249	8.77193		46.6667	33.3333			-47	-68				-40.6409	-45.6149	-56.5186	-58.3942
	2.34375	9.09091		2.5	8.81954		37.5	53.8462			-55	-45				-51.3444	-35.2605	-53.7824	-44.2742
	10.8197	16.2602		9.01639	9.43089		16.3636	29.3103			-47	-64				-56.1592	-41.9708	-51.0873	-48.2789
	12.9969	8.29563		6.11621	15.2338		12.5	29.703			-78	-53				-54.5876	-46.0859	-46.7633	-48.0438
	11.7479	8.76289		6.30372	16.7526		13.6364	30.7692			-71	-88				-56.9467	-50.9207	-42.0293	-53.5764
											-40	-60				-56.0529	-47.4399
				38.65030675*	outlier							-70				-39.5125	-45.742
												-56				-45.049	-47.9286
												-88
												-72
												-60
												-70
FIGURE 3F
Current step	Grouped													ISOLATED
0	0	0	0	0	0	0	0	0	0	0	0	0	0	0	0	0	0	0	0	0	0	0	0	0	0	0	0	0	0	0	0	0
50	1	9	0	0	6	7	1	12	9	2	2	2	2	7	10	11	9	2	1	5	1	9	2	12	4	12	11	0	2	9	12	10
100	2	16	2	3	8	13	2	21	16	6	5	11	2	9	14	16	15	7	10	11	3	14	6	18	5	19	17	9	9	16	14	16
150	3	8	3	6	7	18	3	27	22	13	17	15	2	14	17	21	20	14	24	17	2	6	17	8	5	25	21	14	14	22	17	19
200	4	6	4	7	6	19	4	24	24	17	17	17	2	18	21	24	23	15	33	21	2	5	21	11	6	30	11	18	19	27	16	22
250	5	5	5	9	5	14	4	18	11	18	13	18	2	19	24	27	25	6	40	30	4	3	25	21	6	35	3	21	20	28	6	20
300	6	5	7	12	4	8	4	11	7	19	13	19	2	13	15	32	20	2	44	33	4	3	29	3	6	37	2	20	30	31	6	14
FIGURE 3k
CURRENT STEP	ISOLATED + CNO															Isolated															GROUPED + CNO												GROUPED
0	0	0	0	0	0	0	0	0	0	0	0	0	0	0	0	0	0	0	0	0	0	0	0	0	0	0	0	0	0	0	0	0	0	0	0	0	0	0	0	0	0	0	0	0	0	0	0	0	0
50	2	1	2	2	0	0	1	1	0	0	2	1	0	1	1	0	0	2	2	3	0	2	1	0	3	2	2	2	3	3	1	0	0	0	0	1	0	1	1	1	0	1	1	1	0	2	1	0	1
100	3	2	2	3	0	1	1	1	0	1	3	2	1	1	3	1	1	3	3	4	0	3	1	1	4	3	3	2	3	4	3	1	0	0	0	2	1	2	2	2	0	2	2	3	1	2	2	1	2
150	4	2	3	3	1	2	1	2	0	2	3	2	1	1	4	1	1	4	6	5	1	3	1	1	5	3	4	4	4	5	4	3	0	0	0	3	2	3	2	4	1	2	2	4	2	3	3	2	3
200	4	3	3	3	0	3	1	2	1	2	4	2	1	1	4	2	1	5	5	6	1	4	2	2	6	4	5	4	7	6	4	3	0	0	0	4	2	3	3	3	1	3	3	5	3	3	3	2	3
250	5	3	3	4	1	4	1	2	2	2	3	2	1	1	4	2	1	5	6	7	1	5	2	1	6	4	6	6	7	7	4	3	0	0	0	5	3	4	3	3	1	2	3	4	4	3	4	2	4
300	5	2	4	3	1	2	1	3	2	2	5	2	1	1	4	2	1	6	6	8	1	5	2	2	7	3	8	6	9	9	4	3	0	0	0	6	4	5	4	4	1	4	4	3	4	4	4	3	4
FIGURE 3N
	GROUPED								ISOLATED
no CNO	79.71	65.88	77.13	53.91	90.81	78.56	81.2	75.42	99.9	119.7	123.96	119.25	111.24	62.52	128.07	113.91
CNO	88.35	59.91	79.89	97.26	70.95	58.92	39.18	77.56	118.68	93	43.2	84.18	62.82	74.76	72.18	79.65
[truncated: 5 more columns]

## Sheet: Statistical analysis
FIGURE B				FIGURE C				FIGURE D				FIGURE G
Column B	ISOLATED			Column B	ISOLATED			Column B	ISOLATED			Column B	ISOLATED
vs.	vs.			vs.	vs.			vs.	vs.			vs.	vs.
Column A	GROUPED			Column A	GROUPED			Column A	GROUPED			Column A	GROUPED
Unpaired t test				Mann Whitney test				Unpaired t test				Mann Whitney test
P value	0.0199			P value	0.0439			P value	0.0021			P value	0.1483
P value summary	*			Exact or approximate P value?	Exact			P value summary	**			Exact or approximate P value?	Exact
Significantly different (P < 0.05)?	Yes			P value summary	*			Significantly different (P < 0.05)?	Yes			P value summary	ns
One- or two-tailed P value?	Two-tailed			Significantly different (P < 0.05)?	Yes			One- or two-tailed P value?	Two-tailed			Significantly different (P < 0.05)?	No
t, df	t=2.510, df=22			One- or two-tailed P value?	Two-tailed			t, df	t=3.491, df=22			One- or two-tailed P value?	Two-tailed
				Sum of ranks in column A,B	111 , 165							Sum of ranks in column A,B	252.5 , 275.5
How big is the difference?				Mann-Whitney U	33			How big is the difference?				Mann-Whitney U	85.5
Mean of column A	9.652							Mean of column A	18.91
Mean of column B	14.27			Difference between medians				Mean of column B	36.99			Difference between medians
Difference between means (B - A) ± SEM	4.620 ± 1.841			Median of column A	8.714, n=12			Difference between means (B - A) ± SEM	18.08 ± 5.178			Median of column A	-48.00, n=13
95% confidence interval	0.8021 to 8.437			Median of column B	11.64, n=11			95% confidence interval	7.339 to 28.82			Median of column B	-60.00, n=19
R squared (eta squared)	0.2226			Difference: Actual	2.924			R squared (eta squared)	0.3565			Difference: Actual	-12
				Difference: Hodges-Lehmann	3.452							Difference: Hodges-Lehmann	-7
F test to compare variances								F test to compare variances
F, DFn, Dfd	1.215, 11, 11							F, DFn, Dfd	1.042, 11, 11
P value	0.7524							P value	0.9472
P value summary	ns							P value summary	ns
Significantly different (P < 0.05)?	No							Significantly different (P < 0.05)?	No
Data analyzed								Data analyzed
Sample size, column A	12							Sample size, column A	12
Sample size, column B	12							Sample size, column B	12

## Sheet: 2-way RM ANOVA - figure 3F
FIGURE F
Two-way RM ANOVA	Matching: Stacked
Assume sphericity?	No
Alpha	0.05
Source of Variation	% of total variation	P value	P value summary	Significant?	Geisser-Greenhouse's epsilon
current step x House condition	2.67	0.0118	*	Yes
current step	28.77	<0.0001	****	Yes	0.3095
House condition	7.074	0.0112	*	Yes
Subject	29.05	<0.0001	****	Yes
ANOVA table	SS	DF	MS	F (DFn, DFd)	P value
current step x House condition	536.8	6	89.47	F (6, 180) = 2.828	P=0.0118
current step	5785	6	964.2	F (1.857, 55.71) = 30.47	P<0.0001
House condition	1422	1	1422	F (1, 30) = 7.306	P=0.0112
Subject	5840	30	194.7	F (30, 180) = 6.153	P<0.0001
Residual	5695	180	31.64
Difference between column means
Mean of Grouped	7.681
Mean of ISOLATED	12.81
Difference between means	-5.131
SE of difference	1.898
95% CI of difference	-9.007 to -1.254
Data summary
Number of columns (House condition)	2
Number of rows (current step)	7
Number of subjects (Subject)	32
Number of missing values	0
Compare each cell mean with the other cell mean in that row
Number of families	1
Number of comparisons per family	7
Alpha	0.05
Uncorrected Fisher's LSD	Mean Diff.	95.00% CI of diff.	Significant?	Summary	Individual P Value
Grouped - ISOLATED
0	0
50	-2.713	-5.785 to 0.3603	No	ns	0.0813
100	-3.769	-8.169 to 0.6304	No	ns	0.0892
150	-4.555	-10.19 to 1.077	No	ns	0.1076
200	-6.437	-12.51 to -0.3650	Yes	*	0.0386
250	-9.336	-15.63 to -3.044	Yes	**	0.0051
300	-9.105	-16.31 to -1.902	Yes	*	0.0153
Test details	Mean 1	Mean 2	Mean Diff.	SE of diff.	N1	N2	t	DF
Grouped - ISOLATED
0	0	0	0	0	13	19
50	4.077	6.789	-2.713	1.499	13	19	1.81	27.41
100	8.231	12	-3.769	2.112	13	19	1.785	20.39
150	11.08	15.63	-4.555	2.714	13	19	1.678	21.8
200	11.62	18.05	-6.437	2.955	13	19	2.178	26.2
250	9.769	19.11	-9.336	3.074	13	19	3.038	28.4
300	9	18.11	-9.105	3.5	13	19	2.602	25.32

## Sheet: 3-way RM ANOVA - figure 3K
FIGURE 3K
Three-way ANOVA	Matching by factor: current step
Assume sphericity?	No
Alpha	0.05
Source of Variation	% of total variation	P value	P value summary	Significant?	Geisser-Greenhouse's epsilon
current step	35.31	<0.0001	****	Yes	0.3269
house condition	2.485	0.0689	ns	No
cno treatment	4.19	0.0195	*	Yes
current step x house condition	0.5737	0.0865	ns	No
current step x cno treatment	1.17	0.0011	**	Yes
house condition x cno treatment	1.649	0.1363	ns	No
current step x house condition x cno treatment	1.064	0.0026	**	Yes
Subject	35.96
ANOVA table	SS	DF	MS	F (DFn, DFd)	P value
current step	462.3	6	77.05	F (1.962, 98.08) = 114.8	P<0.0001
house condition	32.54	1	32.54	F (1, 50) = 3.456	P=0.0689
cno treatment	54.86	1	54.86	F (1, 50) = 5.826	P=0.0195
current step x house condition	7.512	6	1.252	F (6, 300) = 1.866	P=0.0865
current step x cno treatment	15.32	6	2.554	F (6, 300) = 3.806	P=0.0011
house condition x cno treatment	21.59	1	21.59	F (1, 50) = 2.293	P=0.1363
current step x house condition x cno treatment	13.93	6	2.321	F (6, 300) = 3.459	P=0.0026
Subject	470.8	50	9.416
Residual	201.3	300	0.6711
Data summary
Number of columns	2 x 2
Number of rows (current step)	7
Number of subjects (Subject)	54
Number of missing values	0
Compare each cell mean with every other cell mean
Number of families	1
Number of comparisons per family	378
Alpha	0.05
Uncorrected Fisher's LSD	Mean Diff.	95.00% CI of diff.	Significant?	Summary	Individual P Value
0:ISOLATED + CNO vs. 0:Isolated	0
0:ISOLATED + CNO vs. 0:GROUPED + CNO	0
0:ISOLATED + CNO vs. 0:GROUPED	0
0:Isolated vs. 0:GROUPED + CNO	0
0:Isolated vs. 0:GROUPED	0
0:GROUPED + CNO vs. 0:GROUPED	0
50:ISOLATED + CNO vs. 50:Isolated	-0.7333	-1.489 to 0.02280	No	ns	0.0568
50:ISOLATED + CNO vs. 50:GROUPED + CNO	0.4333	-0.09374 to 0.9604	No	ns	0.1027
50:ISOLATED + CNO vs. 50:GROUPED	0.1	-0.4464 to 0.6464	No	ns	0.7093
50:Isolated vs. 50:GROUPED + CNO	1.167	0.4604 to 1.873	Yes	**	0.0025
50:Isolated vs. 50:GROUPED	0.8333	0.1139 to 1.553	Yes	*	0.0252
50:GROUPED + CNO vs. 50:GROUPED	-0.3333	-0.7997 to 0.1330	No	ns	0.1523
100:ISOLATED + CNO vs. 100:Isolated	-0.8	-1.687 to 0.08668	No	ns	0.0751
100:ISOLATED + CNO vs. 100:GROUPED + CNO	0.35	-0.4942 to 1.194	No	ns	0.4004
100:ISOLATED + CNO vs. 100:GROUPED	-0.06667	-0.8373 to 0.7039	No	ns	0.86
100:Isolated vs. 100:GROUPED + CNO	1.15	0.2171 to 2.083	Yes	*	0.0177
100:Isolated vs. 100:GROUPED	0.7333	-0.1366 to 1.603	No	ns	0.0948
100:GROUPED + CNO vs. 100:GROUPED	-0.4167	-1.244 to 0.4103	No	ns	0.3069
150:ISOLATED + CNO vs. 150:Isolated	-1.133	-2.267 to -0.0001588	Yes	*	0.05
150:ISOLATED + CNO vs. 150:GROUPED + CNO	0.06667	-1.019 to 1.152	No	ns	0.8995
150:ISOLATED + CNO vs. 150:GROUPED	-0.2667	-1.156 to 0.6229	No	ns	0.5422
150:Isolated vs. 150:GROUPED + CNO	1.2	-0.09166 to 2.492	No	ns	0.0672
150:Isolated vs. 150:GROUPED	0.8667	-0.2790 to 2.012	No	ns	0.1314
200:ISOLATED + CNO vs. 200:Isolated	-1.733	-2.982 to -0.4843	Yes	**	0.0085
200:ISOLATED + CNO vs. 200:GROUPED + CNO	0.1	-1.044 to 1.244	No	ns	0.8577
200:ISOLATED + CNO vs. 200:GROUPED	-0.4	-1.368 to 0.5675	No	ns	0.4023
200:GROUPED + CNO vs. 200:GROUPED	-0.5	-1.651 to 0.6513	No	ns	0.3762
250:ISOLATED + CNO vs. 250:Isolated	-1.867	-3.308 to -0.4254	Yes	*	0.0135
250:ISOLATED + CNO vs. 250:GROUPED + CNO	0.2	-1.052 to 1.452	No	ns	0.7425
250:ISOLATED + CNO vs. 250:GROUPED	-0.2167	-1.185 to 0.7519	No	ns	0.6489
250:Isolated vs. 250:GROUPED + CNO	2.067	0.4484 to 3.685	Yes	*	0.0144
250:Isolated vs. 250:GROUPED	1.65	0.2133 to 3.087	Yes	*	0.0264
250:GROUPED + CNO vs. 250:GROUPED	-0.4167	-1.664 to 0.8309	No	ns	0.4931
300:ISOLATED + CNO vs. 300:Isolated	-2.467	-4.215 to -0.7179	Yes	**	0.008
300:ISOLATED + CNO vs. 300:GROUPED + CNO	-0.3833	-1.871 to 1.104	No	ns	0.5952
300:ISOLATED + CNO vs. 300:GROUPED	-0.3833	-1.403 to 0.6363	No	ns	0.446
300:Isolated vs. 300:GROUPED + CNO	2.083	0.08351 to 4.083	Yes	*	0.0418
300:Isolated vs. 300:GROUPED	2.083	0.3526 to 3.814	Yes	*	0.0209
300:GROUPED + CNO vs. 300:GROUPED	0	-1.466 to 1.466	No	ns	>0.9999
Test details	Mean 1	Mean 2	Mean Diff.	SE of diff.	N1	N2	t	DF
0:ISOLATED + CNO vs. 0:Isolated	0	0	0	0	15	15
0:ISOLATED + CNO vs. 0:GROUPED + CNO	0	0	0	0	15	12
0:ISOLATED + CNO vs. 0:GROUPED	0	0	0	0	15	12
0:ISOLATED + CNO vs. 50:ISOLATED + CNO	0	0.9333	-0.9333	0.2063	15	15	4.525	14
0:ISOLATED + CNO vs. 50:Isolated	0	1.667	-1.667	0.3034	15	15	5.493	14
0:ISOLATED + CNO vs. 50:GROUPED + CNO	0	0.5	-0.5	0.1508	15	12	3.317	11
0:ISOLATED + CNO vs. 50:GROUPED	0	0.8333	-0.8333	0.1667	15	12	5	11
0:ISOLATED + CNO vs. 100:ISOLATED + CNO	0	1.6	-1.6	0.2726	15	15	5.87	14
0:ISOLATED + CNO vs. 100:Isolated	0	2.4	-2.4	0.3352	15	15	7.159	14
0:ISOLATED + CNO vs. 100:GROUPED + CNO	0	1.25	-1.25	0.3046	15	12	4.103	11
0:ISOLATED + CNO vs. 100:GROUPED	0	1.667	-1.667	0.2562	15	12	6.504	11
0:ISOLATED + CNO vs. 150:ISOLATED + CNO	0	2.067	-2.067	0.3003	15	15	6.883	14
0:ISOLATED + CNO vs. 150:Isolated	0	3.2	-3.2	0.4598	15	15	6.959	14
0:ISOLATED + CNO vs. 150:GROUPED + CNO	0	2	-2	0.4264	15	12	4.69	11
0:ISOLATED + CNO vs. 150:GROUPED	0	2.333	-2.333	0.3098	15	12	7.532	11
0:ISOLATED + CNO vs. 200:ISOLATED + CNO	0	2.267	-2.267	0.3305	15	15	6.859	14
0:ISOLATED + CNO vs. 200:Isolated	0	4	-4	0.5071	15	15	7.888	14
0:ISOLATED + CNO vs. 200:GROUPED + CNO	0	2.167	-2.167	0.441	15	12	4.914	11
0:ISOLATED + CNO vs. 200:GROUPED	0	2.667	-2.667	0.3333	15	12	8	11
0:ISOLATED + CNO vs. 250:ISOLATED + CNO	0	2.533	-2.533	0.3362	15	15	7.536	14
0:ISOLATED + CNO vs. 250:Isolated	0	4.4	-4.4	0.6079	15	15	7.238	14
0:ISOLATED + CNO vs. 250:GROUPED + CNO	0	2.333	-2.333	0.4975	15	12	4.69	11
0:ISOLATED + CNO vs. 250:GROUPED	0	2.75	-2.75	0.3286	15	12	8.37	11
0:ISOLATED + CNO vs. 300:ISOLATED + CNO	0	2.533	-2.533	0.3634	15	15	6.971	14
0:ISOLATED + CNO vs. 300:Isolated	0	5	-5	0.7559	15	15	6.614	14
0:ISOLATED + CNO vs. 300:GROUPED + CNO	0	2.917	-2.917	0.6088	15	12	4.791	11
0:ISOLATED + CNO vs. 300:GROUPED	0	2.917	-2.917	0.3362	15	12	8.676	11
0:Isolated vs. 0:GROUPED + CNO	0	0	0	0	15	12
0:Isolated vs. 0:GROUPED	0	0	0	0	15	12
0:Isolated vs. 50:ISOLATED + CNO	0	0.9333	-0.9333	0.2063	15	15	4.525	14
0:Isolated vs. 50:Isolated	0	1.667	-1.667	0.3034	15	15	5.493	14
0:Isolated vs. 50:GROUPED + CNO	0	0.5	-0.5	0.1508	15	12	3.317	11
0:Isolated vs. 50:GROUPED	0	0.8333	-0.8333	0.1667	15	12	5	11
0:Isolated vs. 100:ISOLATED + CNO	0	1.6	-1.6	0.2726	15	15	5.87	14
0:Isolated vs. 100:Isolated	0	2.4	-2.4	0.3352	15	15	7.159	14
0:Isolated vs. 100:GROUPED + CNO	0	1.25	-1.25	0.3046	15	12	4.103	11
0:Isolated vs. 100:GROUPED	0	1.667	-1.667	0.2562	15	12	6.504	11
0:Isolated vs. 150:ISOLATED + CNO	0	2.067	-2.067	0.3003	15	15	6.883	14
0:Isolated vs. 150:Isolated	0	3.2	-3.2	0.4598	15	15	6.959	14
0:Isolated vs. 150:GROUPED + CNO	0	2	-2	0.4264	15	12	4.69	11
0:Isolated vs. 150:GROUPED	0	2.333	-2.333	0.3098	15	12	7.532	11
0:Isolated vs. 200:ISOLATED + CNO	0	2.267	-2.267	0.3305	15	15	6.859	14
0:Isolated vs. 200:Isolated	0	4	-4	0.5071	15	15	7.888	14
0:Isolated vs. 200:GROUPED + CNO	0	2.167	-2.167	0.441	15	12	4.914	11
0:Isolated vs. 200:GROUPED	0	2.667	-2.667	0.3333	15	12	8	11
0:Isolated vs. 250:ISOLATED + CNO	0	2.533	-2.533	0.3362	15	15	7.536	14
0:Isolated vs. 250:Isolated	0	4.4	-4.4	0.6079	15	15	7.238	14
0:Isolated vs. 250:GROUPED + CNO	0	2.333	-2.333	0.4975	15	12	4.69	11
0:Isolated vs. 250:GROUPED	0	2.75	-2.75	0.3286	15	12	8.37	11
0:Isolated vs. 300:ISOLATED + CNO	0	2.533	-2.533	0.3634	15	15	6.971	14
0:Isolated vs. 300:Isolated	0	5	-5	0.7559	15	15	6.614	14
0:Isolated vs. 300:GROUPED + CNO	0	2.917	-2.917	0.6088	15	12	4.791	11
0:Isolated vs. 300:GROUPED	0	2.917	-2.917	0.3362	15	12	8.676	11
0:GROUPED + CNO vs. 0:GROUPED	0	0	0	0	12	12
0:GROUPED + CNO vs. 50:ISOLATED + CNO	0	0.9333	-0.9333	0.2063	12	15	4.525	14
0:GROUPED + CNO vs. 50:Isolated	0	1.667	-1.667	0.3034	12	15	5.493	14
0:GROUPED + CNO vs. 50:GROUPED + CNO	0	0.5	-0.5	0.1508	12	12	3.317	11
0:GROUPED + CNO vs. 50:GROUPED	0	0.8333	-0.8333	0.1667	12	12	5	11
0:GROUPED + CNO vs. 100:ISOLATED + CNO	0	1.6	-1.6	0.2726	12	15	5.87	14
0:GROUPED + CNO vs. 100:Isolated	0	2.4	-2.4	0.3352	12	15	7.159	14
0:GROUPED + CNO vs. 100:GROUPED + CNO	0	1.25	-1.25	0.3046	12	12	4.103	11
0:GROUPED + CNO vs. 100:GROUPED	0	1.667	-1.667	0.2562	12	12	6.504	11
0:GROUPED + CNO vs. 150:ISOLATED + CNO	0	2.067	-2.067	0.3003	12	15	6.883	14
0:GROUPED + CNO vs. 150:Isolated	0	3.2	-3.2	0.4598	12	15	6.959	14
0:GROUPED + CNO vs. 150:GROUPED + CNO	0	2	-2	0.4264	12	12	4.69	11
0:GROUPED + CNO vs. 150:GROUPED	0	2.333	-2.333	0.3098	12	12	7.532	11
0:GROUPED + CNO vs. 200:ISOLATED + CNO	0	2.267	-2.267	0.3305	12	15	6.859	14
0:GROUPED + CNO vs. 200:Isolated	0	4	-4	0.5071	12	15	7.888	14
0:GROUPED + CNO vs. 200:GROUPED + CNO	0	2.167	-2.167	0.441	12	12	4.914	11
0:GROUPED + CNO vs. 200:GROUPED	0	2.667	-2.667	0.3333	12	12	8	11
0:GROUPED + CNO vs. 250:ISOLATED + CNO	0	2.533	-2.533	0.3362	12	15	7.536	14
0:GROUPED + CNO vs. 250:Isolated	0	4.4	-4.4	0.6079	12	15	7.238	14
0:GROUPED + CNO vs. 250:GROUPED + CNO	0	2.333	-2.333	0.4975	12	12	4.69	11
0:GROUPED + CNO vs. 250:GROUPED	0	2.75	-2.75	0.3286	12	12	8.37	11
0:GROUPED + CNO vs. 300:ISOLATED + CNO	0	2.533	-2.533	0.3634	12	15	6.971	14
0:GROUPED + CNO vs. 300:Isolated	0	5	-5	0.7559	12	15	6.614	14
0:GROUPED + CNO vs. 300:GROUPED + CNO	0	2.917	-2.917	0.6088	12	12	4.791	11
0:GROUPED + CNO vs. 300:GROUPED	0	2.917	-2.917	0.3362	12	12	8.676	11
0:GROUPED vs. 50:ISOLATED + CNO	0	0.9333	-0.9333	0.2063	12	15	4.525	14
0:GROUPED vs. 50:Isolated	0	1.667	-1.667	0.3034	12	15	5.493	14
0:GROUPED vs. 50:GROUPED + CNO	0	0.5	-0.5	0.1508	12	12	3.317	11
0:GROUPED vs. 50:GROUPED	0	0.8333	-0.8333	0.1667	12	12	5	11
0:GROUPED vs. 100:ISOLATED + CNO	0	1.6	-1.6	0.2726	12	15	5.87	14
0:GROUPED vs. 100:Isolated	0	2.4	-2.4	0.3352	12	15	7.159	14
0:GROUPED vs. 100:GROUPED + CNO	0	1.25	-1.25	0.3046	12	12	4.103	11
0:GROUPED vs. 100:GROUPED	0	1.667	-1.667	0.2562	12	12	6.504	11
0:GROUPED vs. 150:ISOLATED + CNO	0	2.067	-2.067	0.3003	12	15	6.883	14
0:GROUPED vs. 150:Isolated	0	3.2	-3.2	0.4598	12	15	6.959	14
0:GROUPED vs. 150:GROUPED + CNO	0	2	-2	0.4264	12	12	4.69	11
0:GROUPED vs. 150:GROUPED	0	2.333	-2.333	0.3098	12	12	7.532	11
0:GROUPED vs. 200:ISOLATED + CNO	0	2.267	-2.267	0.3305	12	15	6.859	14
0:GROUPED vs. 200:Isolated	0	4	-4	0.5071	12	15	7.888	14
0:GROUPED vs. 200:GROUPED + CNO	0	2.167	-2.167	0.441	12	12	4.914	11
0:GROUPED vs. 200:GROUPED	0	2.667	-2.667	0.3333	12	12	8	11
0:GROUPED vs. 250:ISOLATED + CNO	0	2.533	-2.533	0.3362	12	15	7.536	14
0:GROUPED vs. 250:Isolated	0	4.4	-4.4	0.6079	12	15	7.238	14
0:GROUPED vs. 250:GROUPED + CNO	0	2.333	-2.333	0.4975	12	12	4.69	11
0:GROUPED vs. 250:GROUPED	0	2.75	-2.75	0.3286	12	12	8.37	11
0:GROUPED vs. 300:ISOLATED + CNO	0	2.533	-2.533	0.3634	12	15	6.971	14
0:GROUPED vs. 300:Isolated	0	5	-5	0.7559	12	15	6.614	14
0:GROUPED vs. 300:GROUPED + CNO	0	2.917	-2.917	0.6088	12	12	4.791	11
0:GROUPED vs. 300:GROUPED	0	2.917	-2.917	0.3362	12	12	8.676	11
50:ISOLATED + CNO vs. 50:Isolated	0.9333	1.667	-0.7333	0.3669	15	15	1.999	24.66
50:ISOLATED + CNO vs. 50:GROUPED + CNO	0.9333	0.5	0.4333	0.2555	15	12	1.696	24.17
50:ISOLATED + CNO vs. 50:GROUPED	0.9333	0.8333	0.1	0.2652	15	12	0.3771	24.8
50:ISOLATED + CNO vs. 100:ISOLATED + CNO	0.9333	1.6	-0.6667	0.1594	15	15	4.183	14
50:ISOLATED + CNO vs. 100:Isolated	0.9333	2.4	-1.467	0.3936	15	15	3.726	23.27
50:ISOLATED + CNO vs. 100:GROUPED + CNO	0.9333	1.25	-0.3167	0.3679	15	12	0.8608	20.08
50:ISOLATED + CNO vs. 100:GROUPED	0.9333	1.667	-0.7333	0.3289	15	12	2.229	22.46
50:ISOLATED + CNO vs. 150:ISOLATED + CNO	0.9333	2.067	-1.133	0.2153	15	15	5.264	14
50:ISOLATED + CNO vs. 150:Isolated	0.9333	3.2	-2.267	0.504	15	15	4.498	19.41
50:ISOLATED + CNO vs. 150:GROUPED + CNO	0.9333	2	-1.067	0.4737	15	12	2.252	16.06
50:ISOLATED + CNO vs. 150:GROUPED	0.9333	2.333	-1.4	0.3722	15	12	3.762	19.85
50:ISOLATED + CNO vs. 200:ISOLATED + CNO	0.9333	2.267	-1.333	0.252	15	15	5.292	14
50:ISOLATED + CNO vs. 200:Isolated	0.9333	4	-3.067	0.5474	15	15	5.602	18.51
50:ISOLATED + CNO vs. 200:GROUPED + CNO	0.9333	2.167	-1.233	0.4868	15	12	2.533	15.75
50:ISOLATED + CNO vs. 200:GROUPED	0.9333	2.667	-1.733	0.392	15	12	4.422	18.86
50:ISOLATED + CNO vs. 250:ISOLATED + CNO	0.9333	2.533	-1.6	0.2895	15	15	5.527	14
50:ISOLATED + CNO vs. 250:Isolated	0.9333	4.4	-3.467	0.6419	15	15	5.4	17.18
50:ISOLATED + CNO vs. 250:GROUPED + CNO	0.9333	2.333	-1.4	0.5385	15	12	2.6	14.76
50:ISOLATED + CNO vs. 250:GROUPED	0.9333	2.75	-1.817	0.3879	15	12	4.683	19.05
50:ISOLATED + CNO vs. 300:ISOLATED + CNO	0.9333	2.533	-1.6	0.2545	15	15	6.287	14
50:ISOLATED + CNO vs. 300:Isolated	0.9333	5	-4.067	0.7836	15	15	5.19	16.07
50:ISOLATED + CNO vs. 300:GROUPED + CNO	0.9333	2.917	-1.983	0.6427	15	12	3.086	13.53
50:ISOLATED + CNO vs. 300:GROUPED	0.9333	2.917	-1.983	0.3944	15	12	5.029	18.75
50:Isolated vs. 50:GROUPED + CNO	1.667	0.5	1.167	0.3388	15	12	3.443	20.2
50:Isolated vs. 50:GROUPED	1.667	0.8333	0.8333	0.3462	15	12	2.407	21.26
50:Isolated vs. 100:ISOLATED + CNO	1.667	1.6	0.06667	0.4079	15	15	0.1635	27.68
50:Isolated vs. 100:Isolated	1.667	2.4	-0.7333	0.1182	15	15	6.205	14
50:Isolated vs. 100:GROUPED + CNO	1.667	1.25	0.4167	0.43	15	12	0.9691	24.62
50:Isolated vs. 100:GROUPED	1.667	1.667	0	0.3971	15	12	0	24.94
50:Isolated vs. 150:ISOLATED + CNO	1.667	2.067	-0.4	0.4269	15	15	0.937	28
50:Isolated vs. 150:Isolated	1.667	3.2	-1.533	0.2364	15	15	6.487	14
50:Isolated vs. 150:GROUPED + CNO	1.667	2	-0.3333	0.5233	15	12	0.6369	20.77
50:Isolated vs. 150:GROUPED	1.667	2.333	-0.6667	0.4336	15	12	1.537	24.51
50:Isolated vs. 200:ISOLATED + CNO	1.667	2.267	-0.6	0.4486	15	15	1.337	27.8
50:Isolated vs. 200:Isolated	1.667	4	-2.333	0.2323	15	15	10.04	14
50:Isolated vs. 200:GROUPED + CNO	1.667	2.167	-0.5	0.5353	15	12	0.9341	20.31
50:Isolated vs. 200:GROUPED	1.667	2.667	-1	0.4507	15	12	2.219	23.89
50:Isolated vs. 250:ISOLATED + CNO	1.667	2.533	-0.8667	0.4529	15	15	1.914	27.71
50:Isolated vs. 250:Isolated	1.667	4.4	-2.733	0.3305	15	15	8.271	14
50:Isolated vs. 250:GROUPED + CNO	1.667	2.333	-0.6667	0.5827	15	12	1.144	18.68
50:Isolated vs. 250:GROUPED	1.667	2.75	-1.083	0.4472	15	12	2.422	24.03
50:Isolated vs. 300:ISOLATED + CNO	1.667	2.533	-0.8667	0.4734	15	15	1.831	27.14
50:Isolated vs. 300:Isolated	1.667	5	-3.333	0.4944	15	15	6.742	14
50:Isolated vs. 300:GROUPED + CNO	1.667	2.917	-1.25	0.6802	15	12	1.838	16.35
50:Isolated vs. 300:GROUPED	1.667	2.917	-1.25	0.4528	15	12	2.76	23.81
50:GROUPED + CNO vs. 50:GROUPED	0.5	0.8333	-0.3333	0.2247	12	12	1.483	21.78
50:GROUPED + CNO vs. 100:ISOLATED + CNO	0.5	1.6	-1.1	0.3115	12	15	3.532	21.34
50:GROUPED + CNO vs. 100:Isolated	0.5	2.4	-1.9	0.3676	12	15	5.169	19.23
50:GROUPED + CNO vs. 100:GROUPED + CNO	0.5	1.25	-0.75	0.1794	12	12	4.18	11
50:GROUPED + CNO vs. 100:GROUPED	0.5	1.667	-1.167	0.2973	12	12	3.924	17.8
50:GROUPED + CNO vs. 150:ISOLATED + CNO	0.5	2.067	-1.567	0.336	12	15	4.663	20.31
50:GROUPED + CNO vs. 150:Isolated	0.5	3.2	-2.7	0.4839	12	15	5.58	16.92
50:GROUPED + CNO vs. 150:GROUPED + CNO	0.5	2	-1.5	0.3371	12	12	4.45	11
50:GROUPED + CNO vs. 150:GROUPED	0.5	2.333	-1.833	0.3445	12	12	5.322	15.93
50:GROUPED + CNO vs. 200:ISOLATED + CNO	0.5	2.267	-1.767	0.3632	12	15	4.864	19.37
50:GROUPED + CNO vs. 200:Isolated	0.5	4	-3.5	0.529	12	15	6.616	16.42
50:GROUPED + CNO vs. 200:GROUPED + CNO	0.5	2.167	-1.667	0.3333	12	12	5	11
50:GROUPED + CNO vs. 200:GROUPED	0.5	2.667	-2.167	0.3658	12	12	5.922	15.32
50:GROUPED + CNO vs. 250:ISOLATED + CNO	0.5	2.533	-2.033	0.3684	12	15	5.519	19.21
50:GROUPED + CNO vs. 250:Isolated	0.5	4.4	-3.9	0.6263	12	15	6.227	15.7
50:GROUPED + CNO vs. 250:GROUPED + CNO	0.5	2.333	-1.833	0.4051	12	12	4.525	11
50:GROUPED + CNO vs. 250:GROUPED	0.5	2.75	-2.25	0.3615	12	12	6.224	15.44
50:GROUPED + CNO vs. 300:ISOLATED + CNO	0.5	2.533	-2.033	0.3934	12	15	5.168	18.53
50:GROUPED + CNO vs. 300:Isolated	0.5	5	-4.5	0.7708	12	15	5.838	15.11
50:GROUPED + CNO vs. 300:GROUPED + CNO	0.5	2.917	-2.417	0.4994	12	12	4.839	11
50:GROUPED + CNO vs. 300:GROUPED	0.5	2.917	-2.417	0.3684	12	12	6.56	15.25
50:GROUPED vs. 100:ISOLATED + CNO	0.8333	1.6	-0.7667	0.3195	12	15	2.4	22.44
50:GROUPED vs. 100:Isolated	0.8333	2.4	-1.567	0.3744	12	15	4.185	20.21
50:GROUPED vs. 100:GROUPED + CNO	0.8333	1.25	-0.4167	0.3472	12	12	1.2	17.04
50:GROUPED vs. 100:GROUPED	0.8333	1.667	-0.8333	0.2072	12	12	4.022	11
50:GROUPED vs. 150:ISOLATED + CNO	0.8333	2.067	-1.233	0.3434	12	15	3.591	21.37
50:GROUPED vs. 150:Isolated	0.8333	3.2	-2.367	0.4891	12	15	4.839	17.54
50:GROUPED vs. 150:GROUPED + CNO	0.8333	2	-1.167	0.4578	12	12	2.548	14.28
50:GROUPED vs. 150:GROUPED	0.8333	2.333	-1.5	0.2611	12	12	5.745	11
50:GROUPED vs. 200:ISOLATED + CNO	0.8333	2.267	-1.433	0.3701	12	15	3.873	20.35
50:GROUPED vs. 200:Isolated	0.8333	4	-3.167	0.5338	12	15	5.933	16.94
50:GROUPED vs. 200:GROUPED + CNO	0.8333	2.167	-1.333	0.4714	12	12	2.828	14.08
50:GROUPED vs. 200:GROUPED	0.8333	2.667	-1.833	0.2973	12	12	6.167	11
50:GROUPED vs. 250:ISOLATED + CNO	0.8333	2.533	-1.7	0.3752	12	15	4.531	20.18
50:GROUPED vs. 250:Isolated	0.8333	4.4	-3.567	0.6303	12	15	5.659	16.07
50:GROUPED vs. 250:GROUPED + CNO	0.8333	2.333	-1.5	0.5246	12	12	2.859	13.44
50:GROUPED vs. 250:GROUPED	0.8333	2.75	-1.917	0.3362	12	12	5.702	11
50:GROUPED vs. 300:ISOLATED + CNO	0.8333	2.533	-1.7	0.3998	12	15	4.252	19.42
50:GROUPED vs. 300:Isolated	0.8333	5	-4.167	0.7741	12	15	5.383	15.35
50:GROUPED vs. 300:GROUPED + CNO	0.8333	2.917	-2.083	0.6312	12	12	3.301	12.64
50:GROUPED vs. 300:GROUPED	0.8333	2.917	-2.083	0.3362	12	12	6.197	11
100:ISOLATED + CNO vs. 100:Isolated	1.6	2.4	-0.8	0.432	15	15	1.852	26.88
100:ISOLATED + CNO vs. 100:GROUPED + CNO	1.6	1.25	0.35	0.4088	15	12	0.8562	23.72
100:ISOLATED + CNO vs. 100:GROUPED	1.6	1.667	-0.06667	0.3741	15	12	0.1782	24.91
100:ISOLATED + CNO vs. 150:ISOLATED + CNO	1.6	2.067	-0.4667	0.1333	15	15	3.5	14
100:ISOLATED + CNO vs. 150:Isolated	1.6	3.2	-1.6	0.5345	15	15	2.993	22.76
100:ISOLATED + CNO vs. 150:GROUPED + CNO	1.6	2	-0.4	0.5061	15	12	0.7904	19.29
100:ISOLATED + CNO vs. 150:GROUPED	1.6	2.333	-0.7333	0.4126	15	12	1.777	23.54
100:ISOLATED + CNO vs. 200:ISOLATED + CNO	1.6	2.267	-0.6667	0.1594	15	15	4.183	14
100:ISOLATED + CNO vs. 200:Isolated	1.6	4	-2.4	0.5757	15	15	4.169	21.47
100:ISOLATED + CNO vs. 200:GROUPED + CNO	1.6	2.167	-0.5667	0.5184	15	12	1.093	18.85
100:ISOLATED + CNO vs. 200:GROUPED	1.6	2.667	-1.067	0.4306	15	12	2.477	22.67
100:ISOLATED + CNO vs. 250:ISOLATED + CNO	1.6	2.533	-0.9333	0.2282	15	15	4.09	14
100:ISOLATED + CNO vs. 250:Isolated	1.6	4.4	-2.8	0.6662	15	15	4.203	19.41
100:ISOLATED + CNO vs. 250:GROUPED + CNO	1.6	2.333	-0.7333	0.5672	15	12	1.293	17.37
100:ISOLATED + CNO vs. 250:GROUPED	1.6	2.75	-1.15	0.4269	15	12	2.694	22.85
100:ISOLATED + CNO vs. 300:ISOLATED + CNO	1.6	2.533	-0.9333	0.2282	15	15	4.09	14
100:ISOLATED + CNO vs. 300:Isolated	1.6	5	-3.4	0.8036	15	15	4.231	17.58
100:ISOLATED + CNO vs. 300:GROUPED + CNO	1.6	2.917	-1.317	0.667	15	12	1.974	15.37
100:ISOLATED + CNO vs. 300:GROUPED	1.6	2.917	-1.317	0.4328	15	12	3.042	22.56
100:Isolated vs. 100:GROUPED + CNO	2.4	1.25	1.15	0.453	15	12	2.539	24.98
100:Isolated vs. 100:GROUPED	2.4	1.667	0.7333	0.4219	15	12	1.738	24.5
100:Isolated vs. 150:ISOLATED + CNO	2.4	2.067	0.3333	0.45	15	15	0.7407	27.67
100:Isolated vs. 150:Isolated	2.4	3.2	-0.8	0.2225	15	15	3.595	14
100:Isolated vs. 150:GROUPED + CNO	2.4	2	0.4	0.5424	15	12	0.7375	22.15
100:Isolated vs. 150:GROUPED	2.4	2.333	0.06667	0.4564	15	12	0.1461	24.96
100:Isolated vs. 200:ISOLATED + CNO	2.4	2.267	0.1333	0.4707	15	15	0.2832	27.99
100:Isolated vs. 200:Isolated	2.4	4	-1.6	0.235	15	15	6.808	14
100:Isolated vs. 200:GROUPED + CNO	2.4	2.167	0.2333	0.5539	15	12	0.4212	21.7
100:Isolated vs. 200:GROUPED	2.4	2.667	-0.2667	0.4727	15	12	0.5641	24.67
100:Isolated vs. 250:ISOLATED + CNO	2.4	2.533	-0.1333	0.4748	15	15	0.2808	28
100:Isolated vs. 250:Isolated	2.4	4.4	-2	0.3381	15	15	5.916	14
100:Isolated vs. 250:GROUPED + CNO	2.4	2.333	0.06667	0.5999	15	12	0.1111	20.02
100:Isolated vs. 250:GROUPED	2.4	2.75	-0.35	0.4694	15	12	0.7456	24.75
100:Isolated vs. 300:ISOLATED + CNO	2.4	2.533	-0.1333	0.4944	15	15	0.2697	27.82
100:Isolated vs. 300:Isolated	2.4	5	-2.6	0.4957	15	15	5.245	14
100:Isolated vs. 300:GROUPED + CNO	2.4	2.917	-0.5167	0.695	15	12	0.7435	17.42
100:Isolated vs. 300:GROUPED	2.4	2.917	-0.5167	0.4747	15	12	1.088	24.62
100:GROUPED + CNO vs. 100:GROUPED	1.25	1.667	-0.4167	0.3981	12	12	1.047	21.37
100:GROUPED + CNO vs. 150:ISOLATED + CNO	1.25	2.067	-0.8167	0.4277	12	15	1.909	24.55
100:GROUPED + CNO vs. 150:Isolated	1.25	3.2	-1.95	0.5516	12	15	3.535	23.28
100:GROUPED + CNO vs. 150:GROUPED + CNO	1.25	2	-0.75	0.2176	12	12	3.447	11
100:GROUPED + CNO vs. 150:GROUPED	1.25	2.333	-1.083	0.4345	12	12	2.493	21.99
100:GROUPED + CNO vs. 200:ISOLATED + CNO	1.25	2.267	-1.017	0.4495	12	15	2.262	24.96
100:GROUPED + CNO vs. 200:Isolated	1.25	4	-2.75	0.5916	12	15	4.649	22.24
100:GROUPED + CNO vs. 200:GROUPED + CNO	1.25	2.167	-0.9167	0.193	12	12	4.75	11
100:GROUPED + CNO vs. 200:GROUPED	1.25	2.667	-1.417	0.4516	12	12	3.137	21.82
100:GROUPED + CNO vs. 250:ISOLATED + CNO	1.25	2.533	-1.283	0.4537	12	15	2.829	24.99
100:GROUPED + CNO vs. 250:Isolated	1.25	4.4	-3.15	0.6799	12	15	4.633	20.29
100:GROUPED + CNO vs. 250:GROUPED + CNO	1.25	2.333	-1.083	0.2876	12	12	3.767	11
100:GROUPED + CNO vs. 250:GROUPED	1.25	2.75	-1.5	0.4481	12	12	3.348	21.88
100:GROUPED + CNO vs. 300:ISOLATED + CNO	1.25	2.533	-1.283	0.4742	12	15	2.706	24.92
100:GROUPED + CNO vs. 300:Isolated	1.25	5	-3.75	0.815	12	15	4.601	18.3
100:GROUPED + CNO vs. 300:GROUPED + CNO	1.25	2.917	-1.667	0.3761	12	12	4.432	11
100:GROUPED + CNO vs. 300:GROUPED	1.25	2.917	-1.667	0.4537	12	12	3.674	21.79
100:GROUPED vs. 150:ISOLATED + CNO	1.667	2.067	-0.4	0.3947	12	15	1.013	24.96
100:GROUPED vs. 150:Isolated	1.667	3.2	-1.533	0.5264	12	15	2.913	21.42
100:GROUPED vs. 150:GROUPED + CNO	1.667	2	-0.3333	0.4975	12	12	0.6701	18.03
100:GROUPED vs. 150:GROUPED	1.667	2.333	-0.6667	0.1421	12	12	4.69	11
100:GROUPED vs. 200:ISOLATED + CNO	1.667	2.267	-0.6	0.4182	12	15	1.435	24.58
100:GROUPED vs. 200:Isolated	1.667	4	-2.333	0.5682	12	15	4.107	20.37
100:GROUPED vs. 200:GROUPED + CNO	1.667	2.167	-0.5	0.51	12	12	0.9804	17.67
100:GROUPED vs. 200:GROUPED	1.667	2.667	-1	0.1741	12	12	5.745	11
100:GROUPED vs. 250:ISOLATED + CNO	1.667	2.533	-0.8667	0.4227	12	15	2.05	24.48
100:GROUPED vs. 250:Isolated	1.667	4.4	-2.733	0.6597	12	15	4.143	18.67
100:GROUPED vs. 250:GROUPED + CNO	1.667	2.333	-0.6667	0.5596	12	12	1.191	16.45
100:GROUPED vs. 250:GROUPED	1.667	2.75	-1.083	0.2876	12	12	3.767	11
100:GROUPED vs. 300:ISOLATED + CNO	1.667	2.533	-0.8667	0.4447	12	15	1.949	23.87
100:GROUPED vs. 300:Isolated	1.667	5	-3.333	0.7982	12	15	4.176	17.11
100:GROUPED vs. 300:GROUPED + CNO	1.667	2.917	-1.25	0.6605	12	12	1.893	14.78
100:GROUPED vs. 300:GROUPED	1.667	2.917	-1.25	0.3286	12	12	3.804	11
150:ISOLATED + CNO vs. 150:Isolated	2.067	3.2	-1.133	0.5492	15	15	2.064	24.1
150:ISOLATED + CNO vs. 150:GROUPED + CNO	2.067	2	0.06667	0.5215	15	12	0.1278	20.63
150:ISOLATED + CNO vs. 150:GROUPED	2.067	2.333	-0.2667	0.4314	15	12	0.6181	24.43
150:ISOLATED + CNO vs. 200:ISOLATED + CNO	2.067	2.267	-0.2	0.1447	15	15	1.382	14
150:ISOLATED + CNO vs. 200:Isolated	2.067	4	-1.933	0.5893	15	15	3.281	22.74
150:ISOLATED + CNO vs. 200:GROUPED + CNO	2.067	2.167	-0.1	0.5335	15	12	0.1874	20.16
150:ISOLATED + CNO vs. 200:GROUPED	2.067	2.667	-0.6	0.4486	15	12	1.337	23.79
150:ISOLATED + CNO vs. 250:ISOLATED + CNO	2.067	2.533	-0.4667	0.1919	15	15	2.432	14
150:ISOLATED + CNO vs. 250:Isolated	2.067	4.4	-2.333	0.678	15	15	3.442	20.45
150:ISOLATED + CNO vs. 250:GROUPED + CNO	2.067	2.333	-0.2667	0.5811	15	12	0.4589	18.54
150:ISOLATED + CNO vs. 250:GROUPED	2.067	2.75	-0.6833	0.4451	15	12	1.535	23.93
150:ISOLATED + CNO vs. 300:ISOLATED + CNO	2.067	2.533	-0.4667	0.1919	15	15	2.432	14
150:ISOLATED + CNO vs. 300:Isolated	2.067	5	-2.933	0.8134	15	15	3.606	18.31
150:ISOLATED + CNO vs. 300:GROUPED + CNO	2.067	2.917	-0.85	0.6788	15	12	1.252	16.25
150:ISOLATED + CNO vs. 300:GROUPED	2.067	2.917	-0.85	0.4507	15	12	1.886	23.7
150:Isolated vs. 150:GROUPED + CNO	3.2	2	1.2	0.6271	15	12	1.914	24.95
150:Isolated vs. 150:GROUPED	3.2	2.333	0.8667	0.5544	15	12	1.563	23.45
150:Isolated vs. 200:ISOLATED + CNO	3.2	2.267	0.9333	0.5662	15	15	1.648	25.42
150:Isolated vs. 200:Isolated	3.2	4	-0.8	0.2225	15	15	3.595	14
150:Isolated vs. 200:GROUPED + CNO	3.2	2.167	1.033	0.6371	15	12	1.622	24.85
150:Isolated vs. 200:GROUPED	3.2	2.667	0.5333	0.5679	15	12	0.9391	24.11
150:Isolated vs. 250:ISOLATED + CNO	3.2	2.533	0.6667	0.5696	15	15	1.17	25.64
150:Isolated vs. 250:Isolated	3.2	4.4	-1.2	0.243	15	15	4.938	14
150:Isolated vs. 250:GROUPED + CNO	3.2	2.333	0.8667	0.6774	15	12	1.279	24.04
150:Isolated vs. 250:GROUPED	3.2	2.75	0.45	0.5651	15	12	0.7963	23.99
150:Isolated vs. 300:ISOLATED + CNO	3.2	2.533	0.6667	0.5861	15	15	1.137	26.58
150:Isolated vs. 300:Isolated	3.2	5	-1.8	0.4163	15	15	4.323	14
150:Isolated vs. 300:GROUPED + CNO	3.2	2.917	0.2833	0.7629	15	12	0.3714	21.61
150:Isolated vs. 300:GROUPED	3.2	2.917	0.2833	0.5696	15	12	0.4974	24.18
150:GROUPED + CNO vs. 150:GROUPED	2	2.333	-0.3333	0.527	12	12	0.6325	20.08
150:GROUPED + CNO vs. 200:ISOLATED + CNO	2	2.267	-0.2667	0.5395	12	15	0.4943	21.96
150:GROUPED + CNO vs. 200:Isolated	2	4	-2	0.6625	12	15	3.019	24.93
150:GROUPED + CNO vs. 200:GROUPED + CNO	2	2.167	-0.1667	0.1667	12	12	1	11
150:GROUPED + CNO vs. 200:GROUPED	2	2.667	-0.6667	0.5412	12	12	1.232	20.79
150:GROUPED + CNO vs. 250:ISOLATED + CNO	2	2.533	-0.5333	0.543	12	15	0.9822	22.19
150:GROUPED + CNO vs. 250:Isolated	2	4.4	-2.4	0.7425	12	15	3.232	23.83
150:GROUPED + CNO vs. 250:GROUPED + CNO	2	2.333	-0.3333	0.2247	12	12	1.483	11
150:GROUPED + CNO vs. 250:GROUPED	2	2.75	-0.75	0.5383	12	12	1.393	20.66
150:GROUPED + CNO vs. 300:ISOLATED + CNO	2	2.533	-0.5333	0.5603	12	15	0.952	23.18
150:GROUPED + CNO vs. 300:Isolated	2	5	-3	0.8679	12	15	3.457	21.55
150:GROUPED + CNO vs. 300:GROUPED + CNO	2	2.917	-0.9167	0.3362	12	12	2.727	11
150:GROUPED + CNO vs. 300:GROUPED	2	2.917	-0.9167	0.543	12	12	1.688	20.86
150:GROUPED vs. 200:ISOLATED + CNO	2.333	2.267	0.06667	0.453	12	15	0.1472	24.92
150:GROUPED vs. 200:Isolated	2.333	4	-1.667	0.5942	12	15	2.805	22.42
150:GROUPED vs. 200:GROUPED + CNO	2.333	2.167	0.1667	0.5389	12	12	0.3093	19.73
150:GROUPED vs. 200:GROUPED	2.333	2.667	-0.3333	0.1421	12	12	2.345	11
150:GROUPED vs. 250:ISOLATED + CNO	2.333	2.533	-0.2	0.4571	12	15	0.4375	24.96
150:GROUPED vs. 250:Isolated	2.333	4.4	-2.067	0.6823	12	15	3.029	20.46
150:GROUPED vs. 250:GROUPED + CNO	2.333	2.333	0	0.586	12	12	0	18.42
150:GROUPED vs. 250:GROUPED	2.333	2.75	-0.4167	0.2599	12	12	1.603	11
150:GROUPED vs. 300:ISOLATED + CNO	2.333	2.533	-0.2	0.4775	12	15	0.4188	24.96
150:GROUPED vs. 300:Isolated	2.333	5	-2.667	0.8169	12	15	3.264	18.44
150:GROUPED vs. 300:GROUPED + CNO	2.333	2.917	-0.5833	0.683	12	12	0.854	16.34
150:GROUPED vs. 300:GROUPED	2.333	2.917	-0.5833	0.3128	12	12	1.865	11
200:ISOLATED + CNO vs. 200:Isolated	2.267	4	-1.733	0.6053	15	15	2.864	24.07
200:ISOLATED + CNO vs. 200:GROUPED + CNO	2.267	2.167	0.1	0.551	15	12	0.1815	21.5
200:ISOLATED + CNO vs. 200:GROUPED	2.267	2.667	-0.4	0.4694	15	12	0.8522	24.59
200:ISOLATED + CNO vs. 250:ISOLATED + CNO	2.267	2.533	-0.2667	0.1533	15	15	1.74	14
200:ISOLATED + CNO vs. 250:Isolated	2.267	4.4	-2.133	0.6919	15	15	3.083	21.61
200:ISOLATED + CNO vs. 250:GROUPED + CNO	2.267	2.333	-0.06667	0.5972	15	12	0.1116	19.82
200:ISOLATED + CNO vs. 250:GROUPED	2.267	2.75	-0.4833	0.466	15	12	1.037	24.67
200:ISOLATED + CNO vs. 300:ISOLATED + CNO	2.267	2.533	-0.2667	0.1817	15	15	1.468	14
200:ISOLATED + CNO vs. 300:Isolated	2.267	5	-2.733	0.825	15	15	3.313	19.16
200:ISOLATED + CNO vs. 300:GROUPED + CNO	2.267	2.917	-0.65	0.6927	15	12	0.9384	17.26
200:ISOLATED + CNO vs. 300:GROUPED	2.267	2.917	-0.65	0.4714	15	12	1.379	24.53
200:Isolated vs. 200:GROUPED + CNO	4	2.167	1.833	0.672	15	12	2.728	24.99
200:Isolated vs. 200:GROUPED	4	2.667	1.333	0.6068	15	12	2.197	23.2
200:Isolated vs. 250:ISOLATED + CNO	4	2.533	1.467	0.6084	15	15	2.411	24.31
200:Isolated vs. 250:Isolated	4	4.4	-0.4	0.1902	15	15	2.103	14
200:Isolated vs. 250:GROUPED + CNO	4	2.333	1.667	0.7104	15	12	2.346	24.74
200:Isolated vs. 250:GROUPED	4	2.75	1.25	0.6042	15	12	2.069	23.05
200:Isolated vs. 300:ISOLATED + CNO	4	2.533	1.467	0.6239	15	15	2.351	25.38
200:Isolated vs. 300:Isolated	4	5	-1	0.3086	15	15	3.24	14
200:Isolated vs. 300:GROUPED + CNO	4	2.917	1.083	0.7923	15	12	1.367	22.9
200:Isolated vs. 300:GROUPED	4	2.917	1.083	0.6084	15	12	1.781	23.29
200:GROUPED + CNO vs. 200:GROUPED	2.167	2.667	-0.5	0.5528	12	12	0.9045	20.48
200:GROUPED + CNO vs. 250:ISOLATED + CNO	2.167	2.533	-0.3667	0.5545	12	15	0.6613	21.73
200:GROUPED + CNO vs. 250:Isolated	2.167	4.4	-2.233	0.751	12	15	2.974	24.11
200:GROUPED + CNO vs. 250:GROUPED + CNO	2.167	2.333	-0.1667	0.1667	12	12	1	11
200:GROUPED + CNO vs. 250:GROUPED	2.167	2.75	-0.5833	0.5499	12	12	1.061	20.34
200:GROUPED + CNO vs. 300:ISOLATED + CNO	2.167	2.533	-0.3667	0.5714	12	15	0.6417	22.77
200:GROUPED + CNO vs. 300:Isolated	2.167	5	-2.833	0.8751	12	15	3.238	21.92
200:GROUPED + CNO vs. 300:GROUPED + CNO	2.167	2.917	-0.75	0.25	12	12	3	11
200:GROUPED + CNO vs. 300:GROUPED	2.167	2.917	-0.75	0.5545	12	12	1.353	20.56
200:GROUPED vs. 250:ISOLATED + CNO	2.667	2.533	0.1333	0.4734	12	15	0.2816	24.69
200:GROUPED vs. 250:Isolated	2.667	4.4	-1.733	0.6933	12	15	2.5	21.24
200:GROUPED vs. 250:GROUPED + CNO	2.667	2.333	0.3333	0.5988	12	12	0.5566	19.22
200:GROUPED vs. 250:GROUPED	2.667	2.75	-0.08333	0.2289	12	12	0.364	11
200:GROUPED vs. 300:ISOLATED + CNO	2.667	2.533	0.1333	0.4931	12	15	0.2704	24.97
200:GROUPED vs. 300:Isolated	2.667	5	-2.333	0.8262	12	15	2.824	19.06
200:GROUPED vs. 300:GROUPED + CNO	2.667	2.917	-0.25	0.694	12	12	0.3602	17.05
200:GROUPED vs. 300:GROUPED	2.667	2.917	-0.25	0.3046	12	12	0.8207	11
250:ISOLATED + CNO vs. 250:Isolated	2.533	4.4	-1.867	0.6947	15	15	2.687	21.83
250:ISOLATED + CNO vs. 250:GROUPED + CNO	2.533	2.333	0.2	0.6004	15	12	0.3331	20.05
250:ISOLATED + CNO vs. 250:GROUPED	2.533	2.75	-0.2167	0.4701	15	12	0.4609	24.76
250:ISOLATED + CNO vs. 300:ISOLATED + CNO	2.533	2.533	0	0.239	15	15	0	14
250:ISOLATED + CNO vs. 300:Isolated	2.533	5	-2.467	0.8273	15	15	2.982	19.33
250:ISOLATED + CNO vs. 300:GROUPED + CNO	2.533	2.917	-0.3833	0.6954	15	12	0.5512	17.46
250:ISOLATED + CNO vs. 300:GROUPED	2.533	2.917	-0.3833	0.4754	15	12	0.8063	24.64
250:Isolated vs. 250:GROUPED + CNO	4.4	2.333	2.067	0.7855	15	12	2.631	24.85
250:Isolated vs. 250:GROUPED	4.4	2.75	1.65	0.691	15	12	2.388	21.08
250:Isolated vs. 300:ISOLATED + CNO	4.4	2.533	1.867	0.7082	15	15	2.636	22.87
250:Isolated vs. 300:Isolated	4.4	5	-0.6	0.235	15	15	2.553	14
250:Isolated vs. 300:GROUPED + CNO	4.4	2.917	1.483	0.8603	15	12	1.724	24.63
250:Isolated vs. 300:GROUPED	4.4	2.917	1.483	0.6946	15	12	2.135	21.33
250:GROUPED + CNO vs. 250:GROUPED	2.333	2.75	-0.4167	0.5962	12	12	0.6989	19.06
250:GROUPED + CNO vs. 300:ISOLATED + CNO	2.333	2.533	-0.2	0.6161	12	15	0.3246	21.14
250:GROUPED + CNO vs. 300:Isolated	2.333	5	-2.667	0.9049	12	15	2.947	23.21
250:GROUPED + CNO vs. 300:GROUPED + CNO	2.333	2.917	-0.5833	0.193	12	12	3.023	11
250:GROUPED + CNO vs. 300:GROUPED	2.333	2.917	-0.5833	0.6004	12	12	0.9716	19.31
250:GROUPED vs. 300:ISOLATED + CNO	2.75	2.533	0.2167	0.4899	12	15	0.4423	24.99
250:GROUPED vs. 300:Isolated	2.75	5	-2.25	0.8242	12	15	2.73	18.93
250:GROUPED vs. 300:GROUPED + CNO	2.75	2.917	-0.1667	0.6918	12	12	0.2409	16.91
250:GROUPED vs. 300:GROUPED	2.75	2.917	-0.1667	0.1667	12	12	1	11
300:ISOLATED + CNO vs. 300:Isolated	2.533	5	-2.467	0.8387	15	15	2.941	20.14
300:ISOLATED + CNO vs. 300:GROUPED + CNO	2.533	2.917	-0.3833	0.709	15	12	0.5407	18.4
300:ISOLATED + CNO vs. 300:GROUPED	2.533	2.917	-0.3833	0.495	15	12	0.7743	24.95
300:Isolated vs. 300:GROUPED + CNO	5	2.917	2.083	0.9706	15	12	2.147	24.78
300:Isolated vs. 300:GROUPED	5	2.917	2.083	0.8273	15	12	2.518	19.13
300:GROUPED + CNO vs. 300:GROUPED	2.917	2.917	0	0.6954	12	12	0	17.14

## Sheet: 2-way RM ANOVA - figure 3L
Figure 3M
Two-way ANOVA	Ordinary
Alpha	0.05
Source of Variation	% of total variation	P value	P value summary	Significant?
Interaction	6.215	0.0661	ns	No
Row Factor	1.539	0.3542	ns	No
Column Factor	3.443	0.1681	ns	No
ANOVA table	SS (Type III)	DF	MS	F (DFn, DFd)	P value
Interaction	127.8	1	127.8	F (1, 50) = 3.531	P=0.0661
Row Factor	31.65	1	31.65	F (1, 50) = 0.8745	P=0.3542
Column Factor	70.81	1	70.81	F (1, 50) = 1.956	P=0.1681
Residual	1810	50	36.2
Difference between column means
Predicted (LS) mean of grouped	-50.07
Predicted (LS) mean of isolated	-47.77
Difference between predicted means	-2.304
SE of difference	1.648
95% CI of difference	-5.614 to 1.005
Difference between row means
Predicted (LS) mean of no CNO	-48.15
Predicted (LS) mean of CNO	-49.69
Difference between predicted means	1.541
SE of difference	1.648
95% CI of difference	-1.769 to 4.850
Interaction CI
Mean diff, A1 - B1	-5.401
Mean diff, A2 - B2	0.7916
(A1 -B1) - (A2 - B2)	-6.192
95% CI of difference	-12.81 to 0.4266
(B1 - A1) - (B2 - A2)	6.192
95% CI of difference	-0.4266 to 12.81
Data summary
Number of columns (Column Factor)	2
Number of rows (Row Factor)	2
Number of values	54

## Sheet: 2-way ANOVA - figure 3N
FIGURE N
Two-way ANOVA	Ordinary
Alpha	0.05
Source of Variation	% of total variation	P value	P value summary	Significant?
Interaction	8.78	0.0466	*	Yes
CNO treatment	14.36	0.0127	*	Yes
House condition	20.14	0.0038	**	Yes
ANOVA table	SS	DF	MS	F (DFn, DFd)	P value
Interaction	1505	1	1505	F (1, 28) = 4.334	P=0.0466
CNO treatment	2462	1	2462	F (1, 28) = 7.088	P=0.0127
House condition	3452	1	3452	F (1, 28) = 9.940	P=0.0038
Residual	9725	28	347.3
Difference between column means
Mean of GROUPED	73.42
Mean of ISOLATION	94.19
Difference between means	-20.77
SE of difference	6.589
95% CI of difference	-34.27 to -7.277
Difference between row means
Mean of no CNO	92.57
Mean of CNO	75.03
Difference between means	17.54
SE of difference	6.589
95% CI of difference	4.045 to 31.04
Interaction CI
Mean diff, A1 - B1	-34.49
Mean diff, A2 - B2	-7.056
(A1 -B1) - (A2 - B2)	-27.44
95% CI of difference	-54.43 to -0.4406
(B1 - A1) - (B2 - A2)	27.44
95% CI of difference	0.4406 to 54.43
Spearman's test for heteroscedasticity
Rs of predicted Y vs. |residual|	0.02725
P value (one tailed)	0.4412
Passed (P > 0.05)?	Yes
Normality of Residuals
Test name	Statistics	P value	Passed normality test (alpha=0.05)?	P value summary
Anderson-Darling (A2*)	0.6075	0.1048	Yes	ns
D'Agostino-Pearson omnibus (K2)	4.279	0.1177	Yes	ns
Shapiro-Wilk (W)	0.9571	0.2286	Yes	ns
Kolmogorov-Smirnov (distance)	0.1438	0.0907	Yes	ns
Data summary
Number of columns (House condition)	2
Number of rows (CNO treatment)	2
Number of values	32
Compare cell means regardless of rows and columns
Number of families	1
Number of comparisons per family	6
Alpha	0.05
Tukey's multiple comparisons test	Mean Diff.	95.00% CI of diff.	Below threshold?	Summary	Adjusted P Value
no CNO:GROUPED vs. no CNO:ISOLATION	-34.49	-59.93 to -9.049	Yes	**	0.0049
no CNO:GROUPED vs. CNO:GROUPED	3.825	-21.62 to 29.27	No	ns	0.9762
no CNO:GROUPED vs. CNO:ISOLATION	-3.231	-28.67 to 22.21	No	ns	0.9854
no CNO:ISOLATION vs. CNO:GROUPED	38.32	12.87 to 63.76	Yes	**	0.0017
no CNO:ISOLATION vs. CNO:ISOLATION	31.26	5.818 to 56.70	Yes	*	0.0116
CNO:GROUPED vs. CNO:ISOLATION	-7.056	-32.50 to 18.39	No	ns	0.8728
Test details	Mean 1	Mean 2	Mean Diff.	SE of diff.	N1	N2	q	DF
no CNO:GROUPED vs. no CNO:ISOLATION	75.33	109.8	-34.49	9.318	8	8	5.235	28
no CNO:GROUPED vs. CNO:GROUPED	75.33	71.5	3.825	9.318	8	8	0.5805	28
no CNO:GROUPED vs. CNO:ISOLATION	75.33	78.56	-3.231	9.318	8	8	0.4904	28
no CNO:ISOLATION vs. CNO:GROUPED	109.8	71.5	38.32	9.318	8	8	5.815	28
no CNO:ISOLATION vs. CNO:ISOLATION	109.8	78.56	31.26	9.318	8	8	4.744	28
CNO:GROUPED vs. CNO:ISOLATION	71.5	78.56	-7.056	9.318	8	8	1.071	28
