# Supplementary material for: Oxytocin neurons mediate the effect of social isolation via the VTA circuits
Source: eLife. 2022 Apr 22;11:e73421. doi: 10.7554/eLife.73421 (PMC9075949; doi:10.7554/eLife.73421)
Supplement: Figure 4—figure supplement 1—source data 1. [file elife-73421-fig4-figsupp1-data1.xlsx]

## Sheet: FIGURE 4 - SUPPLEMENT 1
FIGURE 4 - SUPPLEMENT 1C
	GROUPED												REGROUPED
OBJECT	200	236.5	216.8	233.5	185.6	265.6	293.6	249.2	249.3	202.4	196.4	223.4	190.1	213.5	218.9	200	233.6	230.3	305.1	168.5	218.4	228.2	195.8	257.4
CENTER	83.8	76.5	132.6	107.9	136.8	58	66.5	72.3	87.6	97.3	103.6	104.3	91.3	82.9	76.2	104.6	102.4	97.7	74.5	79.4	88.1	95.3	93.6	162
STIMULUS 1	326.2	297.1	260.5	268.6	284.6	286.4	249.9	288.5	273.1	310.3	300	272.4	328.6	313.6	314.9	305.4	273.9	281.9	230.4	362	303.6	286.5	180.6	310.6
FIGURE 4 - SUPPLEMENT 1D
	GROUPED												REGROUPED
OBJECT	75.5	122.2	112.5	98.5	79.7	157.4	137.7	169.6	122.9	121.9	96.3	67.1	112.5	118.3	118.7	97.8	134.2	137.5	161	102.5	115.1	124.1	99.3	97.1
STIMULUS 1	130.4	196.3	160.5	170.1	154.1	152.8	147.7	224.9	192.6	200.3	177.3	139.8	223.1	191.2	202.9	149.3	210.9	174.7	134.3	215.5	214.3	193.3	189.5	108.3
FIGURE 4 - SUPPLEMENT 1E
	GROUPED												REGROUPED
OBJECT	0.366683	0.383673	0.412088	0.366716	0.34089	0.507415	0.482481	0.429911	0.38954	0.378336	0.351974	0.324311	0.335221	0.382229	0.369092	0.395791	0.388873	0.440423	0.545208	0.322327	0.349423	0.390989	0.343837	0.472736
STIMULUS 1	0.633317	0.616327	0.587912	0.633284	0.65911	0.492585	0.517519	0.570089	0.61046	0.621664	0.648026	0.675689	0.664779	0.617771	0.630908	0.604209	0.611127	0.559577	0.454792	0.677673	0.650577	0.609011	0.656163	0.527264
FIGURE 4 - SUPPLEMENT 1F
	GROUPED												REGROUPED
STIMULUS 1	229.7	238.7	290.2	205.8	152.4	215	271.2	137.3	160.8	243.1	209.6	185.3	265.4	163.1	244.6	174.3	197.3	257.8	212.9	298.3	241.7	177.5	285.9	151.8
CENTER	151.9	110.5	130.7	110	134.6	225.6	108	96.8	114.3	146.9	95.4	117.1	117.9	147.8	85.7	130.4	109.1	123.2	173.5	123.3	102.8	160.2	129.4	218.4
STIMULUS 2	228.3	260.9	189.2	294.2	323	169.3	230.8	375.9	334.9	220	295	297.6	226.7	299.1	279.7	305.3	303.7	229	223.6	188.4	265.6	272.3	184.8	229.7
FIGURE 4 - SUPPLEMENT 1G
	GROUPED												REGROUPED
STIMULUS 1	53.8	61.3	61.7	92.5	74.9	83.2	94.8	57.9	84.1	77.2	76.2	61.1	70.5	68.1	118.8	91.4	136.3	138.5	81	122.9	138.7	79.7	108.7	82.2
STIMULUS 2	62.9	102.1	98.7	182.4	208.2	79.2	87.5	227.2	178.3	126.9	123.2	108.6	122	165	157	146.2	172.5	118	104.9	112.7	162.9	141.3	108.1	129
FIGURE 4 - SUPPLEMENT 1H
	GROUPED												REGROUPED
STIMULUS 1	0.461011	0.375153	0.384663	0.336486	0.264571	0.512315	0.520022	0.203087	0.320503	0.378246	0.382146	0.360047	0.366234	0.292149	0.430747	0.38468	0.441386	0.539961	0.435718	0.521647	0.459881	0.360633	0.501384	0.389205
STIMULUS 2	0.538989	0.624847	0.615337	0.663514	0.735429	0.487685	0.479978	0.796913	0.679497	0.621754	0.617854	0.639953	0.633766	0.707851	0.569253	0.61532	0.558614	0.460039	0.564282	0.478353	0.540119	0.639367	0.498616	0.610795
FIGURE 4 - SUPPLEMENT 1I
	GROUPED												REGROUPED
SOCIAL PREFERENCE	29.437	28.973	29.679	36.535	43.128	36.66	30.82	33.832	29.414	30.741	28.28	47.908	49.004	38.144	41.509	35.27	38.559	37.564	41.987	32.37	38.459	47.363	36.247	35.589
SOCIAL NOVELTY	25.357	28.725	25.95	32.607	36.3	31.005	24.025	27.318	25.243	20.307	20.166	40.346	33.668	28.717	29.188	26.726	31.553	27.477	36.04	32.579	36.654	37.922	28.339	29.724

## Sheet: Statistical analysis
	Figure 4 - Suppl 1D					FIGURE1 - SUPPL 3K
	Grouped		Isolated				GROUPED		ISOLATED
	Paired t test		Paired t test				Object	Stimulus 1	Object	Stimulus 1
	P value	0.0008	P value	0.0027		Theoretical mean	0.5	0.5	0.5	0.5
	P value summary	***	P value summary	**		Actual mean	0.3945	0.6055	0.3947	0.6053
	Significantly different (P < 0.05)?	Yes	Significantly different (P < 0.05)?	Yes		Number of values	12	12	12	12
	One- or two-tailed P value?	Two-tailed	One- or two-tailed P value?	Two-tailed
	t, df	t=4.941, df=9	t, df	t=4.082, df=9		One sample t test
	Number of pairs	10	Number of pairs	10		t, df	t=6.611, df=11	t=6.611, df=11	t=5.698, df=11	t=5.698, df=11
						P value (two tailed)	<0.0001	<0.0001	0.0001	0.0001
	How big is the difference?		How big is the difference?			P value summary	****	****	***	***
	Mean of differences (B - A)	75.16	Mean of differences (D - C)	67.42		Significant (alpha=0.05)?	Yes	Yes	Yes	Yes
	SD of differences	48.1	SD of differences	52.23
	SEM of differences	15.21	SEM of differences	16.52		How big is the discrepancy?
	95% confidence interval	40.75 to 109.6	95% confidence interval	30.06 to 104.8		Discrepancy	-0.1055	0.1055	-0.1053	0.1053
	R squared (partial eta squared)	0.7307	R squared (partial eta squared)	0.6493		SD of discrepancy	0.05528	0.05528	0.06404	0.06404
						SEM of discrepancy	0.01596	0.01596	0.01849	0.01849
	How effective was the pairing?		How effective was the pairing?			95% confidence interval	-0.1406 to -0.07038	0.07038 to 0.1406	-0.1460 to -0.06465	0.06465 to 0.1460
	Correlation coefficient (r)	-0.1553	Correlation coefficient (r)	-0.2195		R squared (partial eta squared)	0.7989	0.7989	0.7469	0.7469
	P value (one tailed)	0.3342	P value (one tailed)	0.2711
	P value summary	ns	P value summary	ns
	Was the pairing significantly effective?	No	Was the pairing significantly effective?	No
						FIGURE1 - SUPPL 4H
							GROUPED		ISOLATED
	Figure 4 - Suppl 1G						Object	Stimulus 1	Object	Stimulus 1
	Grouped		Isolated			Theoretical mean	0.5	0.5	0.5	0.5
	Paired t test		Paired t test			Actual mean	0.3748	0.6252	0.427	0.573
	P value	0.0011	P value	0.0008		Number of values	12	12	12	12
	P value summary	**	P value summary	***
	Significantly different (P < 0.05)?	Yes	Significantly different (P < 0.05)?	Yes		One sample t test
	One- or two-tailed P value?	Two-tailed	One- or two-tailed P value?	Two-tailed		t, df	t=4.694, df=11	t=4.694, df=11	t=3.480, df=11	t=3.480, df=11
	t, df	t=4.736, df=9	t, df	t=4.939, df=9		P value (two tailed)	0.0007	0.0007	0.0051	0.0051
	Number of pairs	10	Number of pairs	10		P value summary	***	***	**	**
						Significant (alpha=0.05)?	Yes	Yes	Yes	Yes
	How big is the difference?		How big is the difference?
	Mean of differences (B - A)	63.28	Mean of differences (D - C)	57.49		How big is the discrepancy?
	SD of differences	42.25	SD of differences	36.81		Discrepancy	-0.1252	0.1252	-0.07304	0.07304
	SEM of differences	13.36	SEM of differences	11.64		SD of discrepancy	0.09237	0.09237	0.07271	0.07271
	95% confidence interval	33.05 to 93.51	95% confidence interval	31.16 to 83.82		SEM of discrepancy	0.02666	0.02666	0.02099	0.02099
	R squared (partial eta squared)	0.7136	R squared (partial eta squared)	0.7305		95% confidence interval	-0.1838 to -0.06647	0.06647 to 0.1838	-0.1192 to -0.02684	0.02684 to 0.1192
						R squared (partial eta squared)	0.667	0.667	0.524	0.524
	How effective was the pairing?		How effective was the pairing?
	Correlation coefficient (r)	0.09481	Correlation coefficient (r)	0.3443
	P value (one tailed)	0.3972	P value (one tailed)	0.165
	P value summary	ns	P value summary	ns
	Was the pairing significantly effective?	No	Was the pairing significantly effective?	No
	Figure 4 - Suppl 1I
	social preference		social novelty
	Mann Whitney test		Unpaired t test
	P value	0.0145	P value	0.0364
	Exact or approximate P value?	Exact	P value summary	*
	P value summary	*	Significantly different (P < 0.05)?	Yes
	Significantly different (P < 0.05)?	Yes	One- or two-tailed P value?	Two-tailed
	One- or two-tailed P value?	Two-tailed	t, df	t=2.260, df=18
	Sum of ranks in column A,B	108 , 192
	Mann-Whitney U	30	How big is the difference?
			Mean of column C	27.68
	Difference between medians		Mean of column D	32.05
	Median of column A	30.78, n=12	Difference between means (D - C) ± SEM	4.369 ± 1.933
	Median of column B	38.30, n=12	95% confidence interval	0.3081 to 8.429
	Difference: Actual	7.521	R squared (eta squared)	0.2211
	Difference: Hodges-Lehmann	6.433
			F test to compare variances
			F, DFn, Dfd	1.346, 9, 9
			P value	0.6651
			P value summary	ns
			Significantly different (P < 0.05)?	No
			Data analyzed
			Sample size, column C	10
			Sample size, column D	10

## Sheet: RM ANOVA suppl 1C
	FIGURE 4 SUPPL1 C
	GROUPED									REGROUPED
	Repeated measures ANOVA summary									Repeated measures ANOVA summary
	Assume sphericity?	No								Assume sphericity?	No
	F	111.4								F	79.34
	P value	<0.0001								P value	<0.0001
	P value summary	****								P value summary	****
	Statistically significant (P < 0.05)?	Yes								Statistically significant (P < 0.05)?	Yes
	Geisser-Greenhouse's epsilon	0.842								Geisser-Greenhouse's epsilon	0.6952
	R squared	0.9101								R squared	0.8782
	Was the matching effective?									Was the matching effective?
	F	0.004765								F	0.694
	P value	>0.9999								P value	0.7307
	P value summary	ns								P value summary	ns
	Is there significant matching (P < 0.05)?	No								Is there significant matching (P < 0.05)?	No
	R squared	0.0002141								R squared	0.04054
	ANOVA table	SS	DF	MS	F (DFn, DFd)	P value				ANOVA table	SS	DF	MS	F (DFn, DFd)	P value
	chamber (between columns)	231375	2	115688	F (1.684, 18.52) = 111.4	P<0.0001				chamber (between columns)	235345	2	117673	F (1.390, 15.30) = 79.34	P<0.0001
	Individual (between rows)	54.44	11	4.949	F (11, 22) = 0.004765	P>0.9999				Individual (between rows)	11322	11	1029	F (11, 22) = 0.6940	P=0.7307
	Residual (random)	22851	22	1039						Residual (random)	32630	22	1483
	Total	254281	35							Total	279297	35
	Data summary									Data summary
	Number of treatments (columns)	3								Number of treatments (columns)	3
	Number of subjects (rows)	12								Number of subjects (rows)	12
	Number of missing values	0								Number of missing values	0
	Number of families	1								Number of families	1
	Number of comparisons per family	3								Number of comparisons per family	3
	Alpha	0.05								Alpha	0.05
	Tukey's multiple comparisons test	Mean Diff.	95.00% CI of diff.	Below threshold?	Summary	Adjusted P Value				Tukey's multiple comparisons test	Mean Diff.	95.00% CI of diff.	Below threshold?	Summary	Adjusted P Value
	OBJECT vs. CENTER	135.4	94.56 to 176.3	Yes	****	<0.0001	A-B			OBJECT vs. CENTER	126	96.32 to 155.6	Yes	****	<0.0001	D-E
	OBJECT vs. STIMULUS 1	-55.44	-92.53 to -18.36	Yes	**	0.0051	A-C			OBJECT vs. STIMULUS 1	-69.35	-123.4 to -15.31	Yes	*	0.0134	D-F
	CENTER vs. STIMULUS 1	-190.9	-218.1 to -163.6	Yes	****	<0.0001	B-C			CENTER vs. STIMULUS 1	-195.3	-235.5 to -155.2	Yes	****	<0.0001	E-F
	Test details	Mean 1	Mean 2	Mean Diff.	SE of diff.	n1	n2	q	DF	Test details	Mean 1	Mean 2	Mean Diff.	SE of diff.	n1	n2	q	DF
	OBJECT vs. CENTER	229.4	93.93	135.4	15.13	12	12	12.66	11	OBJECT vs. CENTER	221.7	95.67	126	10.98	12	12	16.22	11
	OBJECT vs. STIMULUS 1	229.4	284.8	-55.44	13.73	12	12	5.71	11	OBJECT vs. STIMULUS 1	221.7	291	-69.35	20.01	12	12	4.902	11
	CENTER vs. STIMULUS 1	93.93	284.8	-190.9	10.09	12	12	26.75	11	CENTER vs. STIMULUS 1	95.67	291	-195.3	14.86	12	12	18.6	11

## Sheet: RM 2 way ANOVA suppl 1D 
	Figure 4 suppl 1D
	Two-way RM ANOVA	Matching: Stacked
	Assume sphericity?	Yes
	Alpha	0.05
	Source of Variation	% of total variation	P value	P value summary	Significant?
	Target x House condition	0.2647	0.5545	ns	No
	Target	53.52	<0.0001	****	Yes
	House condition	1.162	0.3571	ns	No
	Subject	28.89	0.0906	ns	No
	ANOVA table	SS	DF	MS	F (DFn, DFd)	P value
	Target x House condition	224	1	224	F (1, 22) = 0.3602	P=0.5545
	Target	45307	1	45307	F (1, 22) = 72.84	P<0.0001
	House condition	983.7	1	983.7	F (1, 22) = 0.8850	P=0.3571
	Subject	24455	22	1112	F (22, 22) = 1.787	P=0.0906
	Residual	13683	22	622
	Difference between row means
	Mean of Object	115.8
	Mean of Stimulus 1	177.3
	Difference between means	-61.45
	SE of difference	7.199
	95% CI of difference	-76.38 to -46.52
	Difference between column means
	Mean of GROUPED	142
	Mean of REGROUPED	151.1
	Difference between means	-9.054
	SE of difference	9.625
	95% CI of difference	-29.01 to 10.91
	Interaction CI
	Mean diff, A1 - B1	-4.733
	Mean diff, A2 - B2	-13.38
	(A1 -B1) - (A2 - B2)	8.642
	95% CI of difference	-21.22 to 38.50
	(B1 - A1) - (B2 - A2)	-8.642
	95% CI of difference	-38.50 to 21.22
	Data summary
	Number of columns (House condition)	2
	Number of rows (Target)	2
	Number of subjects (Subject)	24
	Number of missing values	0

## Sheet: RM ANOVA suppl 1F
	FIGURE 4 SUPPL1 F
	GROUPED									REGROUPED
	Repeated measures ANOVA summary									Repeated measures ANOVA summary
	Assume sphericity?	No								Assume sphericity?	No
	F	16.18								F	15.61
	P value	0.0004								P value	0.0001
	P value summary	***								P value summary	***
	Statistically significant (P < 0.05)?	Yes								Statistically significant (P < 0.05)?	Yes
	Geisser-Greenhouse's epsilon	0.7078								Geisser-Greenhouse's epsilon	0.8841
	R squared	0.5953								R squared	0.5867
	Was the matching effective?									Was the matching effective?
	F	0.001378								F	0.001818
	P value	>0.9999								P value	>0.9999
	P value summary	ns								P value summary	ns
	Is there significant matching (P < 0.05)?	No								Is there significant matching (P < 0.05)?	No
	R squared	0.0002788								R squared	0.0003757
	ANOVA table	SS	DF	MS	F (DFn, DFd)	P value				ANOVA table	SS	DF	MS	F (DFn, DFd)	P value
	chamber (between columns)	118621	2	59310	F (1.416, 15.57) = 16.18	P=0.0004				chamber (between columns)	87098	2	43549	F (1.768, 19.45) = 15.61	P=0.0001
	Individual (between rows)	55.57	11	5.052	F (11, 22) = 0.001378	P>0.9999				Individual (between rows)	55.79	11	5.072	F (11, 22) = 0.001818	P>0.9999
	Residual (random)	80650	22	3666						Residual (random)	61360	22	2789
	Total	199326	35							Total	148513	35
	Data summary									Data summary
	Number of treatments (columns)	3								Number of treatments (columns)	3
	Number of subjects (rows)	12								Number of subjects (rows)	12
	Number of missing values	0								Number of missing values	0
	Number of families	1								Number of families	1
	Number of comparisons per family	3								Number of comparisons per family	3
	Alpha	0.05								Alpha	0.05
	Tukey's multiple comparisons test	Mean Diff.	95.00% CI of diff.	Significant?	Summary	Adjusted P Value				Tukey's multiple comparisons test	Mean Diff.	95.00% CI of diff.	Significant?	Summary	Adjusted P Value
	STIM1 vs. CENTER	83.11	41.03 to 125.2	Yes	***	0.0006	A-B			STIM1 vs. CENTER	87.41	27.90 to 146.9	Yes	**	0.0057	D-E
	STIM1 vs. STIM2	-56.67	-138.3 to 24.93	No	ns	0.1916	A-C			STIM1 vs. STIM2	-28.11	-94.22 to 38.01	No	ns	0.5062	D-F
	CENTER vs. STIM2	-139.8	-210.1 to -69.47	Yes	***	0.0006	B-C			CENTER vs. STIM2	-115.5	-163.1 to -67.97	Yes	***	0.0001	E-F
	Test details	Mean 1	Mean 2	Mean Diff.	SE of diff.	n1	n2	q	DF	Test details	Mean 1	Mean 2	Mean Diff.	SE of diff.	n1	n2	q	DF
	STIM1 vs. CENTER	211.6	128.5	83.11	15.58	12	12	7.545	11	STIM1 vs. CENTER	222.6	135.1	87.41	22.03	12	12	5.61	11
	STIM1 vs. STIM2	211.6	268.3	-56.67	30.21	12	12	2.653	11	STIM1 vs. STIM2	222.6	250.7	-28.11	24.48	12	12	1.624	11
	CENTER vs. STIM2	128.5	268.3	-139.8	26.03	12	12	7.594	11	CENTER vs. STIM2	135.1	250.7	-115.5	17.6	12	12	9.28	11

## Sheet: RM 2 way ANOVA suppl 1G
	Figure 4 suppl 1G
	Two-way RM ANOVA	Matching: Stacked
	Assume sphericity?	Yes
	Alpha	0.05
	Source of Variation	% of total variation	P value	P value summary	Significant?
	Target x House condition	2.418	0.179	ns	No
	Target	32.25	<0.0001	****	Yes
	House condition	4.46	0.1	ns	No
	Subject	33.27	0.3326	ns	No
	ANOVA table	SS	DF	MS	F (DFn, DFd)	P value
	Target x House condition	1922	1	1922	F (1, 22) = 1.927	P=0.1790
	Target	25636	1	25636	F (1, 22) = 25.71	P<0.0001
	House condition	3545	1	3545	F (1, 22) = 2.949	P=0.1000
	Subject	26443	22	1202	F (22, 22) = 1.205	P=0.3326
	Residual	21937	22	997.1
	Difference between row means
	Mean of Stimulus 1	88.15
	Mean of Stimulus 2	134.4
	Difference between means	-46.22
	SE of difference	9.116
	95% CI of difference	-65.13 to -27.32
	Difference between column means
	Mean of GROUPED	102.7
	Mean of REGROUPED	119.9
	Difference between means	-17.19
	SE of difference	10.01
	95% CI of difference	-37.94 to 3.568
	Interaction CI
	Mean diff, A1 - B1	-29.84
	Mean diff, A2 - B2	-4.533
	(A1 -B1) - (A2 - B2)	-25.31
	95% CI of difference	-63.12 to 12.50
	(B1 - A1) - (B2 - A2)	25.31
	95% CI of difference	-12.50 to 63.12
	Data summary
	Number of columns (House condition)	2
	Number of rows (Target)	2
	Number of subjects (Subject)	24
	Number of missing values	0
