# Supplementary material for: Oxytocin neurons mediate the effect of social isolation via the VTA circuits
Source: eLife. 2022 Apr 22;11:e73421. doi: 10.7554/eLife.73421 (PMC9075949; doi:10.7554/eLife.73421)
Supplement: Figure 4—figure supplement 2—source data 1. [file elife-73421-fig4-figsupp2-data1.xlsx]

## Sheet: FIGURE 4 - SUPPLEMENT 2
FIGURE 4 - SUPPLEMENT 2C
CURRENT STEP	Grouped											REGROUPED
0	0	0	0	0	0	0	0	0	0	0	0	0	0	0	0	0	0	0	0	0	0	0	0	0
50	3	4	11	4	8	10	8	11	7	6	9	7	3	2	11	3	2	10	7	7	9	8	11	12
100	3	4	4	3	10	7	11	7	10	9	12	11	3	2	12	3	3	13	6	4	11	11	13	10
150	2	4	4	2	6	7	6	5	12	5	7	12	3	2	6	3	4	9	5	3	5	12	7	7
200	2	3	3	2	5	6	5	4	13	4	5	7	3	2	6	2	4	4	5	3	3	12	5	6
250	2	2	3	2	3	4	4	3	14	4	4	5	3	2	5	2	4	3	4	2	3	6	4	5
300	2	1	2	2	2	4	4	2	9	4	3	4	3	2	4	2	4	3	4	2	2	3	3	5
350	2	1	2	2	1	3	4	2	7	3	3	3	3	2	4	2	4	3	3	2	2	3	3	4
400	2	1	2	2	1	3	4	2	4	2	2	2	3	2	4	2	4	3	2	1	2	3	3	4
FIGURE 4 - SUPPLEMENT 2F
CURRENT STEP	Grouped											Regrouped
0	0	0	0	0	0	0	0	0	0	0	0	0	0	0	0	0	0	0	0	0	0	0	0
50	0	0	4	0	1	2	2	1	2	0	2	1	0	1	1	2	2	1	1	1	1	0	3
100	0	0	6	0	3	4	3	2	3	1	4	1	2	2	1	3	3	1	3	3	2	0	3
150	1	1	7	0	3	4	4	2	4	1	4	3	2	2	1	3	4	2	3	3	3	0	5
200	1	1	8	0	3	5	5	2	4	2	6	3	3	3	2	4	2	2	4	4	4	1	6
250	1	1	8	1	5	7	6	2	3	2	5	3	2	4	3	4	4	2	4	6	4	1	7
300	1	1	8	1	5	7	7	1	3	3	4	3	2	3	3	4	4	2	5	6	4	1	7
350	1	1	8	1	5	7	6	2	2	4	4	4	2	3	3	3	5	2	6	6	4	1	8
400	1	1	8	1	6	6	6	2	2	2	4	4	2	4	3	3	6	2	5	6	5	1	8
	FIGURE 4 - SUPPLEMENT 2D				FIGURE 4 - SUPPLEMENT 2G
	GROUPED	REGROUPED			GROUPED	REGROUPED
	-47	-53			-38.53	-51.2629
	-58	-55			-39.359	-64.089
	-42	-45			-39.3619	-46.1469
	-47	-53			-48.1913	-58.2942
	-57	-56			-36.1535	-56.6435
	-50	-47			-50.0335	-80.0271
	-47	-47			-55.3766	-69.1808
	-47	-42			-62.5501	-79.7771
	-54	-60			-47.6728	-75.4989
	-44	-48			-50.9938	-70.2672
	-47	-54			-58.5125	-54.9925
		-44				-52.1124
		-47

## Sheet: Statistical analysis
Figure 4 - Suppl 2D			Figure 4 - Suppl 2G
Unpaired t test			Unpaired t test
P value	0.6536		P value	0.0019
P value summary	ns		P value summary	**
Significantly different (P < 0.05)?	No		Significantly different (P < 0.05)?	Yes
One- or two-tailed P value?	Two-tailed		One- or two-tailed P value?	Two-tailed
t, df	t=0.4549, df=22		t, df	t=3.538, df=21
How big is the difference?			How big is the difference?
Mean of column A	-49.09		Mean of column A	-47.89
Mean of column B	-50.08		Mean of column B	-63.19
Difference between means (B - A) ± SEM	-0.9860 ± 2.167		Difference between means (B - A) ± SEM	-15.31 ± 4.326
95% confidence interval	-5.481 to 3.509		95% confidence interval	-24.30 to -6.310
R squared (eta squared)	0.009319		R squared (eta squared)	0.3735
F test to compare variances			F test to compare variances
F, DFn, Dfd	1.104, 12, 10		F, DFn, Dfd	1.757, 11, 10
P value	0.8881		P value	0.3836
P value summary	ns		P value summary	ns
Significantly different (P < 0.05)?	No		Significantly different (P < 0.05)?	No
Data analyzed			Data analyzed
Sample size, column A	11		Sample size, column A	11
Sample size, column B	13		Sample size, column B	12

## Sheet: RM ANOVA suppl 2C
RM ANOVA suppl 2C
Two-way RM ANOVA	Matching: Stacked
Assume sphericity?	No
Alpha	0.05
Source of Variation	% of total variation	P value	P value summary	Significant?	Geisser-Greenhouse's epsilon
current step x house condition	0.2343	0.9748	ns	No
current step	45.26	<0.0001	****	Yes	0.4607
house condition	0.007969	0.9386	ns	No
Subject	28.83	<0.0001	****	Yes
ANOVA table	SS	DF	MS	F (DFn, DFd)	P value
current step x house condition	5.013	6	0.8355	F (6, 132) = 0.2047	P=0.9748
current step	968.3	6	161.4	F (2.764, 60.82) = 39.55	P<0.0001
house condition	0.1705	1	0.1705	F (1, 22) = 0.006080	P=0.9386
Subject	616.9	22	28.04	F (22, 132) = 6.871	P<0.0001
Residual	538.7	132	4.081
Difference between column means
Mean of Grouped	4.584
Mean of Grouped	4.648
Difference between means	-0.06394
SE of difference	0.8199
95% CI of difference	-1.764 to 1.636
Data summary
Number of columns (house condition)	2
Number of rows (current step)	7
Number of subjects (Subject)	24
Number of missing values	0

## Sheet: RM ANOVA suppl 2F
RM ANOVA suppl 2F
Two-way RM ANOVA	Matching: Stacked
Assume sphericity?	No
Alpha	0.05
Source of Variation	% of total variation	P value	P value summary	Significant?	Geisser-Greenhouse's epsilon
current step x house condition	0.08044	0.9957	ns	No
current step	38.48	<0.0001	****	Yes	0.3305
house condition	0.126	0.811	ns	No
Subject	45.15	<0.0001	****	Yes
ANOVA table	SS	DF	MS	F (DFn, DFd)	P value
current step x house condition	0.5472	6	0.09121	F (6, 126) = 0.1048	P=0.9957
current step	261.8	6	43.63	F (1.983, 41.64) = 50.14	P<0.0001
house condition	0.8576	1	0.8576	F (1, 21) = 0.05862	P=0.8110
Subject	307.2	21	14.63	F (21, 126) = 16.81	P<0.0001
Residual	109.7	126	0.8703
Difference between column means
Mean of Grouped	2.468
Mean of Grouped	2.321
Difference between means	0.1461
SE of difference	0.6034
95% CI of difference	-1.109 to 1.401
Data summary
Number of columns (house condition)	2
Number of rows (current step)	7
Number of subjects (Subject)	23
Number of missing values	0
