# Supplementary material for: Oxytocin neurons mediate the effect of social isolation via the VTA circuits
Source: eLife. 2022 Apr 22;11:e73421. doi: 10.7554/eLife.73421 (PMC9075949; doi:10.7554/eLife.73421)
Supplement: Figure 4—source data 1. [file elife-73421-fig4-data1.xlsx]

## Sheet: FIGURE 4
	FIGURE 4 C				FIGURE 4 D
	GROUPED	REGROUPED			GROUPED	REGROUPED
	71.2	164.3			14.7	18.9
	78	129.7			27.6	16.4
	53.4	151			24.5	21.7
	121.9	130.7			22.1	21.3
	51.6	137.3			18.1	41.9
	109.5	113			35	24.6
	122.1	144.6			24.3	27.7
	103	115.5			32.1	13.5
	133.9	135.4			23.4	31.6
	130.9	102			23	14.8
					FIGURE 4G - raw data
	FIGURE 4 F					Grouped								Regrouped
	GROUPED	REGROUPED			DAY 1	197.9	194.2	204.4	147.4	225.1	174.9	189	180.8	222.6	208.3	208.8	224.4	229.7	257	221	218.1
	197.9	222.6			DAY 2	131.3	137.3	187.3	138	192	199.6	142.6	167.9	120.5	138.3	155	129.3	184.7	204.6	143.8	143.3
	194.2	208.3			DAY 3	115.2	159.3	194.9	112.4	132.9	156.8	129.2	162.7	115.8	145.4	139.5	169.6	135.4	173.6	126.6	101.4
	204.4	208.8			DAY 4	169.8	112.4	170.5	145.8	139.2	150.1	127.2	159.8	104.1	150.2	126.6	176.9	176.9	127	106.3	130.9
	147.4	224.4
	225.1	229.7			FIGURE 4G - plotted data (normalized)
	174.9	257				189.213	Grouped							223.737	Isolated
	189	221			DAY 1	104.591	102.636	108.027	77.9018	118.967	92.4358	99.8877	95.5539	99.4916	93.1002	93.3236	100.296	102.665	114.867	98.7765	97.4803
	180.8	218.1			DAY 2	69.3929	72.5639	98.9892	72.9339	101.473	105.49	75.365	88.7362	53.8578	61.8135	69.2776	57.7909	82.5521	91.4464	64.2717	64.0483
					DAY 3	60.8839	84.1911	103.006	59.4041	70.2385	82.8698	68.283	85.988	51.7571	64.9869	62.3499	75.8031	60.5173	77.5909	56.5842	45.321
					DAY 4	89.7404	59.4041	90.1103	77.0562	73.5681	79.3288	67.226	84.4553	46.5277	67.1322	56.5842	79.0659	79.0659	56.7629	47.511	58.5061
	FIGURE 4k
	GROUPED (CNO)	REGROUPED	REGROUPED (CNO)
	75.15	70.59	59.34
	54.3	100.98	66.99				Figure 1H			Figure 1I
	47.55	94.29	37.86				Day 1	Day 4		Day 1	Day 4
	84	74.58	69.72				197.9	169.8		222.6	104.1
	52.05	82.59	34.92				194.2	112.4		208.3	150.2
	45.3	109.71	62.67				204.4	170.5		208.8	126.6
	87.87	76.08	23.91				147.4	145.8		224.4	176.9
			39.75				225.1	139.2		229.7	176.9
							174.9	150.1		257	127
							189	127.2		221	106.3
							180.8	159.8		218.1	130.9

## Sheet: Statistical analisys
	FIGURE C			FIGURE D			FIGURE F			FIGURE H			FIGURE I
	Unpaired t test			Unpaired t test			Unpaired t test			Paired t test			Paired t test
	P value	0.0076		P value	0.7144		P value	0.0032		P value	0.0057		P value	0.0001
	P value summary	**		P value summary	ns		P value summary	**		P value summary	**		P value summary	***
	Significantly different (P < 0.05)?	Yes		Significantly different (P < 0.05)?	No		Significantly different (P < 0.05)?	Yes		Significantly different (P < 0.05)?	Yes		Significantly different (P < 0.05)?	Yes
	One- or two-tailed P value?	Two-tailed		One- or two-tailed P value?	Two-tailed		One- or two-tailed P value?	Two-tailed		One- or two-tailed P value?	Two-tailed		One- or two-tailed P value?	Two-tailed
	t, df	t=3.004, df=18		t, df	t=0.3717, df=18		t, df	t=3.553, df=14		t, df	t=3.923, df=7		t, df	t=7.621, df=7
										Number of pairs	8		Number of pairs	8
	How big is the difference?			How big is the difference?			How big is the difference?
	Mean of column A	97.55		Mean of column A	24.48		Mean of column A	189.2		How big is the difference?			How big is the difference?
	Mean of column B	132.4		Mean of column B	23.24		Mean of column B	223.7		Mean of differences (B - A)	-42.36		Mean of differences (B - A)	-86.38
	Difference between means (B - A) ± SEM	34.80 ± 11.59		Difference between means (B - A) ± SEM	-1.240 ± 3.336		Difference between means (B - A) ± SEM	34.53 ± 9.717		SD of differences	30.54		SD of differences	32.06
	95% confidence interval	10.46 to 59.14		95% confidence interval	-8.249 to 5.769		95% confidence interval	13.68 to 55.37		SEM of differences	10.8		SEM of differences	11.33
	R squared (eta squared)	0.3339		R squared (eta squared)	0.007618		R squared (eta squared)	0.4742		95% confidence interval	-67.90 to -16.83		95% confidence interval	-113.2 to -59.57
										R squared (partial eta squared)	0.6874		R squared (partial eta squared)	0.8924
	F test to compare variances			F test to compare variances			F test to compare variances
	F, DFn, Dfd	2.845, 9, 9		F, DFn, Dfd	2.092, 9, 9		F, DFn, Dfd	2.215, 7, 7		How effective was the pairing?			How effective was the pairing?
	P value	0.1352		P value	0.2866		P value	0.3159		Correlation coefficient (r)	0.001485		Correlation coefficient (r)	0.01287
	P value summary	ns		P value summary	ns		P value summary	ns		P value (one tailed)	0.4986		P value (one tailed)	0.4879
	Significantly different (P < 0.05)?	No		Significantly different (P < 0.05)?	No		Significantly different (P < 0.05)?	No		P value summary	ns		P value summary	ns
										Was the pairing significantly effective?	No		Was the pairing significantly effective?	No
	Data analyzed			Data analyzed			Data analyzed
	Sample size, column A	10		Sample size, column A	10		Sample size, column A	8
	Sample size, column B	10		Sample size, column B	10		Sample size, column B	8

## Sheet: 2-WAY RM ANOVA - FIGURE G
FIGURE G
Two-way RM ANOVA	Matching: Stacked
Assume sphericity?	No
Alpha	0.05
Source of Variation	% of total variation	P value	P value summary	Significant?	Geisser-Greenhouse's epsilon
Day x House condition	3.721	0.0642	ns	No
Day	46.62	<0.0001	****	Yes	0.9466
House condition	10.99	0.0123	*	Yes
Subject	18.68	0.005	**	Yes
ANOVA table	SS	DF	MS	F (DFn, DFd)	P value
Day x House condition	802.7	3	267.6	F (3, 42) = 2.607	P=0.0642
Day	10058	3	3353	F (2.840, 39.76) = 32.66	P<0.0001
House condition	2371	1	2371	F (1, 14) = 8.240	P=0.0123
Subject	4029	14	287.8	F (14, 42) = 2.804	P=0.0050
Residual	4311	42	102.6
Difference between column means
Mean of GROUPED	85.02
Mean of REGROUPED	72.85
Difference between means	12.17
SE of difference	4.241
95% CI of difference	3.078 to 21.27
Data summary
Number of columns (House condition)	2
Number of rows (Day)	4
Number of subjects (Subject)	16
Number of missing values	0
Within each column, compare rows (simple effects within columns)
Number of families	2
Number of comparisons per family	6
Alpha	0.05
Tukey's multiple comparisons test	Mean Diff.	95.00% CI of diff.	Below threshold?	Summary	Adjusted P Value
GROUPED
DAY 1 vs. DAY 2	14.38	-3.957 to 32.73	No	ns	0.1273
DAY 1 vs. DAY 3	23.14	3.913 to 42.37	Yes	*	0.0214
DAY 1 vs. DAY 4	22.39	3.498 to 41.28	Yes	*	0.0231
DAY 2 vs. DAY 3	8.759	-7.420 to 24.94	No	ns	0.3509
DAY 2 vs. DAY 4	8.007	-10.33 to 26.34	No	ns	0.5131
DAY 3 vs. DAY 4	-0.7526	-20.27 to 18.77	No	ns	0.9992
REGROUPED
DAY 1 vs. DAY 2	31.87	21.19 to 42.55	Yes	***	0.0001
DAY 1 vs. DAY 3	38.14	26.77 to 49.50	Yes	****	<0.0001
DAY 1 vs. DAY 4	38.61	21.84 to 55.37	Yes	***	0.0005
DAY 2 vs. DAY 3	6.269	-8.796 to 21.33	No	ns	0.5491
DAY 2 vs. DAY 4	6.738	-12.34 to 25.81	No	ns	0.6627
DAY 3 vs. DAY 4	0.4692	-14.26 to 15.19	No	ns	0.9995
Test details	Mean 1	Mean 2	Mean Diff.	SE of diff.	N1	N2	q	DF
GROUPED
DAY 1 vs. DAY 2	100	85.62	14.38	5.541	8	8	3.671	7
DAY 1 vs. DAY 3	100	76.86	23.14	5.81	8	8	5.634	7
DAY 1 vs. DAY 4	100	77.61	22.39	5.708	8	8	5.548	7
DAY 2 vs. DAY 3	85.62	76.86	8.759	4.888	8	8	2.534	7
DAY 2 vs. DAY 4	85.62	77.61	8.007	5.538	8	8	2.044	7
DAY 3 vs. DAY 4	76.86	77.61	-0.7526	5.897	8	8	0.1805	7
REGROUPED
DAY 1 vs. DAY 2	100	68.13	31.87	3.227	8	8	13.96	7
DAY 1 vs. DAY 3	100	61.86	38.14	3.433	8	8	15.71	7
DAY 1 vs. DAY 4	100	61.39	38.61	5.066	8	8	10.78	7
DAY 2 vs. DAY 3	68.13	61.86	6.269	4.551	8	8	1.948	7
DAY 2 vs. DAY 4	68.13	61.39	6.738	5.762	8	8	1.654	7
DAY 3 vs. DAY 4	61.86	61.39	0.4692	4.448	8	8	0.1492	7

## Sheet: ANOVA - FIGURE K
FIGURE K
ANOVA summary
F	9.43
P value	0.0014
P value summary	**
Significant diff. among means (P < 0.05)?	Yes
R squared	0.4981
Brown-Forsythe test
F (DFn, DFd)	0.2415 (2, 19)
P value	0.7878
P value summary	ns
Are SDs significantly different (P < 0.05)?	No
Bartlett's test
Bartlett's statistic (corrected)	0.2224
P value	0.8948
P value summary	ns
Are SDs significantly different (P < 0.05)?	No
ANOVA table	SS	DF	MS	F (DFn, DFd)	P value
Treatment (between columns)	5321	2	2660	F (2, 19) = 9.430	P=0.0014
Residual (within columns)	5360	19	282.1
Total	10681	21
Data summary
Number of treatments (columns)	3
Number of values (total)	22
Number of families	1
Number of comparisons per family	3
Alpha	0.05
Tukey's multiple comparisons test	Mean Diff.	95.00% CI of diff.	Below threshold?	Summary	Adjusted P Value
GROUPED(CNO) vs. REGROUPED	-23.23	-46.04 to -0.4202	Yes	*	0.0455	A-B
GROUPED(CNO) vs. REGROUPED (CNO)	14.35	-7.733 to 36.43	No	ns	0.2496	A-C
REGROUPED vs. REGROUPED (CNO)	37.58	15.50 to 59.66	Yes	**	0.001	B-C
Test details	Mean 1	Mean 2	Mean Diff.	SE of diff.	n1	n2	q	DF
GROUPED(CNO) vs. REGROUPED	63.75	86.97	-23.23	8.978	7	7	3.659	19
GROUPED(CNO) vs. REGROUPED (CNO)	63.75	49.4	14.35	8.693	7	8	2.335	19
REGROUPED vs. REGROUPED (CNO)	86.97	49.4	37.58	8.693	7	8	6.114	19
