# Supplementary material for: Oxytocin neurons mediate the effect of social isolation via the VTA circuits
Source: eLife. 2022 Apr 22;11:e73421. doi: 10.7554/eLife.73421 (PMC9075949; doi:10.7554/eLife.73421)
Supplement: Figure 5—figure supplement 1—source data 1. [file elife-73421-fig5-figsupp1-data1.xlsx]

## Sheet: FIGURE 5 - Supplement 1
	FIGURE 5 D			FIGURE 5 F				FIGURE 5 I			FIGURE 5 K
	Grouped	Regrouped		Grouped	Regrouped			Grouped	Regrouped		Grouped	Regrouped
	0.75	0.5977		0.8915	1.183			0.75	0.99		1.11	1.05
	0.329	1.385		0.9938	1.257			0.764	1.175		1.06	1.017
	1.1184	0.514		0.996	1.22			0.73	0.7625		1.07	1.089
	0.659	0.45		1.01	1.72			0.773	0.5761		1.18	0.89
	0.653	0.558		1.078	1.06			0.679	0.784		1.1	0.94
	1.5	0.878		0.9	1.25			0.48	0.62		0.975	1.13
	0.53	1.35		1.15	1.47			0.8	0.469			0.9
	0.35	0.5168		1.04	1.185				0.36			1.02
	1.117	0.333			1.21				0.58
	1.56	0.347			1.2				0.637
	1.563	0.637			1.034				0.55
	0.923	0.789			1.468
	1.72	0.8			1.26
		0.644			1.327

## Sheet: Statistical analysis
	FIGURE D			FIGURE F				FIGURE I				FIGURE K
	Mann Whitney test			Unpaired t test				Mann Whitney test				Unpaired t test
	P value	0.0945		P value	0.0008			P value	0.4252			P value	0.0953
	Exact or approximate P value?	Exact		P value summary	***			Exact or approximate P value?	Exact			P value summary	ns
	P value summary	ns		Significantly different (P < 0.05)?	Yes			P value summary	ns			Significantly different (P < 0.05)?	No
	Significantly different (P < 0.05)?	No		One- or two-tailed P value?	Two-tailed			Significantly different (P < 0.05)?	No			One- or two-tailed P value?	Two-tailed
	One- or two-tailed P value?	Two-tailed		t, df	t=3.964, df=20			One- or two-tailed P value?	Two-tailed			t, df	t=1.811, df=12
	Sum of ranks in column A,B	217 , 161						Sum of ranks in column A,B	76 , 95
	Mann-Whitney U	56		How big is the difference?				Mann-Whitney U	29			How big is the difference?
				Mean of column A	1.007							Mean of column A	1.083
	Difference between medians			Mean of column B	1.275			Difference between medians				Mean of column B	1.005
	Median of column A	0.9230, n=13		Difference between means (B - A) ± SEM	0.2672 ± 0.06740			Median of column A	0.7500, n=7			Difference between means (B - A) ± SEM	-0.07800 ± 0.04307
	Median of column B	0.6174, n=14		95% confidence interval	0.1266 to 0.4078			Median of column B	0.6200, n=11			95% confidence interval	-0.1719 to 0.01585
	Difference: Actual	-0.3057		R squared (eta squared)	0.4399			Difference: Actual	-0.13			R squared (eta squared)	0.2146
	Difference: Hodges-Lehmann	-0.2346						Difference: Hodges-Lehmann	-0.1029
				F test to compare variances								F test to compare variances
				F, DFn, Dfd	4.282, 13, 7							F, DFn, Dfd	1.678, 7, 5
				P value	0.0616							P value	0.5881
				P value summary	ns							P value summary	ns
				Significantly different (P < 0.05)?	No							Significantly different (P < 0.05)?	No
				Data analyzed								Data analyzed
				Sample size, column A	8							Sample size, column A	6
				Sample size, column B	14							Sample size, column B	8
