# Supplementary material for: Oxytocin neurons mediate the effect of social isolation via the VTA circuits
Source: eLife. 2022 Apr 22;11:e73421. doi: 10.7554/eLife.73421 (PMC9075949; doi:10.7554/eLife.73421)
Supplement: Figure 5—source data 1. [file elife-73421-fig5-data1.xlsx]

## Sheet: FIGURE 5
	FIGURE 5 D			FIGURE 5 F				FIGURE 5 I			FIGURE 5 K
	Grouped	Regrouped		Grouped	Regrouped			Grouped	Regrouped		Grouped	Regrouped
	1.07	0.52		1.01	1.25			0.8	0.41		1.1	0.678
	0.95	0.87		1.1	1.17			0.425	0.62		0.77	0.89
	0.78	0.45		0.8	1.03			0.767	1.36		1.12	1.11
	0.47	1.22		0.75	1.12			1.04	0.3		0.8	1.06
	0.48	0.62		1.05	1.06			0.7	0.62		1.24	1.01
				0.93	1.23				0.4			1.01
				0.96								1.02
				0.88
	FIGURE 5 N
	GROUPED	GROUPED (CNO)	REGROUPED	REGROUPED (CNO)
	1.03	1.17	1.28	1.03
	1.08	1.08	1.42	1.17
	0.74	1.008	1.27	0.89
	1.03	0.88	1.4	0.86
	0.9	0.8	1.22	0.87
	1.16	1.04	1.32
	1.16	1.12	1.15
	1.01

## Sheet: Statistical analysis
	FIGURE D			FIGURE F				FIGURE I				FIGURE K
	Unpaired t test			Unpaired t test				Mann Whitney test				Unpaired t test
	P value	0.9417		P value	0.004			P value	0.1602			P value	0.7176
	P value summary	ns		P value summary	**			Exact or approximate P value?	Exact			P value summary	ns
	Significantly different (P < 0.05)?	No		Significantly different (P < 0.05)?	Yes			P value summary	ns			Significantly different (P < 0.05)?	No
	One- or two-tailed P value?	Two-tailed		One- or two-tailed P value?	Two-tailed			Significantly different (P < 0.05)?	No			One- or two-tailed P value?	Two-tailed
	t, df	t=0.07544, df=8		t, df	t=3.545, df=12			One- or two-tailed P value?	Two-tailed			t, df	t=0.3720, df=10
								Sum of ranks in column A,B	38 , 28
	How big is the difference?			How big is the difference?				Mann-Whitney U	7			How big is the difference?
	Mean of column A	0.75		Mean of column A	0.935							Mean of column A	1.006
	Mean of column B	0.736		Mean of column B	1.143			Difference between medians				Mean of column B	0.9683
	Difference between means (B - A) ± SEM	-0.01400 ± 0.1856		Difference between means (B - A) ± SEM	0.2083 ± 0.05878			Median of column A	0.7670, n=5			Difference between means (B - A) ± SEM	-0.03771 ± 0.1014
	95% confidence interval	-0.4419 to 0.4139		95% confidence interval	0.08027 to 0.3364			Median of column B	0.5150, n=6			95% confidence interval	-0.2636 to 0.1882
	R squared (eta squared)	0.000711		R squared (eta squared)	0.5115			Difference: Actual	-0.252			R squared (eta squared)	0.01365
								Difference: Hodges-Lehmann	-0.18
	F test to compare variances			F test to compare variances								F test to compare variances
	F, DFn, Dfd	1.338, 4, 4		F, DFn, Dfd	1.828, 7, 5							F, DFn, Dfd	2.096, 4, 6
	P value	0.7848		P value	0.5248							P value	0.399
	P value summary	ns		P value summary	ns							P value summary	ns
	Significantly different (P < 0.05)?	No		Significantly different (P < 0.05)?	No							Significantly different (P < 0.05)?	No
	Data analyzed			Data analyzed								Data analyzed
	Sample size, column A	5		Sample size, column A	8							Sample size, column A	5
	Sample size, column B	5		Sample size, column B	6							Sample size, column B	7

## Sheet: 2-way ANOVA - figure N
FIGURE N
Two-way ANOVA	Ordinary
Alpha	0.05
Source of Variation	% of total variation	P value	P value summary	Significant?
Interaction	21.8	0.0028	**	Yes
CNO TREATMENT	21.73	0.0028	**	Yes
HOUSE CONDITION	10.6	0.0285	*	Yes
ANOVA table	SS (Type III)	DF	MS	F (DFn, DFd)	P value
Interaction	0.1789	1	0.1789	F (1, 23) = 11.22	P=0.0028
CNO TREATMENT	0.1784	1	0.1784	F (1, 23) = 11.19	P=0.0028
HOUSE CONDITION	0.08702	1	0.08702	F (1, 23) = 5.459	P=0.0285
Residual	0.3667	23	0.01594
Difference between column means
Predicted (LS) mean of GROUPED	1.014
Predicted (LS) mean of REGROUPED	1.129
Difference between predicted means	-0.1153
SE of difference	0.04934
95% CI of difference	-0.2173 to -0.01321
Difference between row means
Predicted (LS) mean of noCNO	1.154
Predicted (LS) mean of CNO	0.989
Difference between predicted means	0.165
SE of difference	0.04934
95% CI of difference	0.06296 to 0.2671
Interaction CI
Mean diff, A1 - B1	-0.2805
Mean diff, A2 - B2	0.05
(A1 -B1) - (A2 - B2)	-0.3305
95% CI of difference	-0.5347 to -0.1264
(B1 - A1) - (B2 - A2)	0.3305
95% CI of difference	0.1264 to 0.5347
Data summary
Number of columns (HOUSE CONDITION)	2
Number of rows (CNO TREATMENT)	2
Number of values	27
Compare cell means regardless of rows and columns
Number of families	1
Number of comparisons per family	6
Alpha	0.05
Tukey's multiple comparisons test	Predicted (LS) mean diff.	95.00% CI of diff.	Below threshold?	Summary	Adjusted P Value
noCNO:GROUPED vs. noCNO:REGROUPED	-0.2805	-0.4614 to -0.09970	Yes	**	0.0014
noCNO:GROUPED vs. CNO:GROUPED	-0.00025	-0.1811 to 0.1806	No	ns	>0.9999
noCNO:GROUPED vs. CNO:REGROUPED	0.04975	-0.1494 to 0.2489	No	ns	0.8994
noCNO:REGROUPED vs. CNO:GROUPED	0.2803	0.09352 to 0.4671	Yes	**	0.002
noCNO:REGROUPED vs. CNO:REGROUPED	0.3303	0.1257 to 0.5349	Yes	***	0.0009
CNO:GROUPED vs. CNO:REGROUPED	0.05	-0.1546 to 0.2546	No	ns	0.905
Test details	Predicted (LS) mean 1	Predicted (LS) mean 2	Predicted (LS) mean diff.	SE of diff.	N1	N2	q	DF
noCNO:GROUPED vs. noCNO:REGROUPED	1.014	1.294	-0.2805	0.06535	8	7	6.071	23
noCNO:GROUPED vs. CNO:GROUPED	1.014	1.014	-0.00025	0.06535	8	7	0.00541	23
noCNO:GROUPED vs. CNO:REGROUPED	1.014	0.964	0.04975	0.07198	8	5	0.9774	23
noCNO:REGROUPED vs. CNO:GROUPED	1.294	1.014	0.2803	0.06749	7	7	5.873	23
noCNO:REGROUPED vs. CNO:REGROUPED	1.294	0.964	0.3303	0.07393	7	5	6.318	23
CNO:GROUPED vs. CNO:REGROUPED	1.014	0.964	0.05	0.07393	7	5	0.9564	23
