# Supplementary material for: Oxytocin neurons mediate the effect of social isolation via the VTA circuits
Source: eLife. 2022 Apr 22;11:e73421. doi: 10.7554/eLife.73421 (PMC9075949; doi:10.7554/eLife.73421)
Supplement: Figure 6—source data 1. [file elife-73421-fig6-data1.xlsx]

## Sheet: FIGURE 6
		FIGURE 6
		Grouped Veh	Grouped NASPM	Regrouped Veh	Regrouped NASPM
		83.7	43.8	101.3	72
		70.9	80	167.7	45.6
		65.2	60.5	109.5	66.2
		116.7	102.1	129.1	94.7
		98.94	100.4	102.7	97.8
		83.88	74.64	154.8	56.94
			70.65	97.89	48.42
				107.1

## Sheet: 2-way ANOVA
FIGURE 6C
Two-way ANOVA	Ordinary
Alpha	0.05
Source of Variation	% of total variation	P value	P value summary	Significant?
Interaction	12.49	0.021	*	Yes
NASPM TREATMENT	28.21	0.0011	**	Yes
HOUSE CONDITION	5.377	0.1182	ns	No
ANOVA table	SS (Type III)	DF	MS	F (DFn, DFd)	P value
Interaction	3042	1	3042	F (1, 24) = 6.099	P=0.0210
NASPM TREATMENT	6873	1	6873	F (1, 24) = 13.78	P=0.0011
HOUSE CONDITION	1310	1	1310	F (1, 24) = 2.626	P=0.1182
Residual	11973	24	498.9
Difference between column means
Predicted (LS) mean of GROUPED	81.28
Predicted (LS) mean of REGROUPED	95.03
Difference between predicted means	-13.75
SE of difference	8.486
95% CI of difference	-31.27 to 3.762
Difference between row means
Predicted (LS) mean of VEH	103.9
Predicted (LS) mean of NASPM	72.41
Difference between predicted means	31.5
SE of difference	8.486
95% CI of difference	13.98 to 49.01
Interaction CI
Mean diff, A1 - B1	-34.71
Mean diff, A2 - B2	7.204
(A1 -B1) - (A2 - B2)	-41.91
95% CI of difference	-76.94 to -6.885
(B1 - A1) - (B2 - A2)	41.91
95% CI of difference	6.885 to 76.94
Data summary
Number of columns (HOUSE CONDITION)	2
Number of rows (NASPM TREATMENT)	2
Number of values	28
Compare cell means regardless of rows and columns
Number of families	1
Number of comparisons per family	6
Alpha	0.05
Tukey's multiple comparisons test	Predicted (LS) mean diff.	95.00% CI of diff.	Below threshold?	Summary	Adjusted P Value
VEH:GROUPED vs. VEH:REGROUPED	-34.71	-67.98 to -1.433	Yes	*	0.0387
VEH:GROUPED vs. NASPM:GROUPED	10.54	-23.74 to 44.82	No	ns	0.8309
VEH:GROUPED vs. NASPM:REGROUPED	17.74	-16.53 to 52.02	No	ns	0.4949
VEH:REGROUPED vs. NASPM:GROUPED	45.25	13.36 to 77.14	Yes	**	0.0034
VEH:REGROUPED vs. NASPM:REGROUPED	52.45	20.56 to 84.34	Yes	***	0.0007
NASPM:GROUPED vs. NASPM:REGROUPED	7.204	-25.73 to 40.14	No	ns	0.93
Test details	Predicted (LS) mean 1	Predicted (LS) mean 2	Predicted (LS) mean diff.	SE of diff.	N1	N2	q	DF
VEH:GROUPED vs. VEH:REGROUPED	86.55	121.3	-34.71	12.06	6	8	4.069	24
VEH:GROUPED vs. NASPM:GROUPED	86.55	76.01	10.54	12.43	6	7	1.2	24
VEH:GROUPED vs. NASPM:REGROUPED	86.55	68.81	17.74	12.43	6	7	2.02	24
VEH:REGROUPED vs. NASPM:GROUPED	121.3	76.01	45.25	11.56	8	7	5.536	24
VEH:REGROUPED vs. NASPM:REGROUPED	121.3	68.81	52.45	11.56	8	7	6.417	24
NASPM:GROUPED vs. NASPM:REGROUPED	76.01	68.81	7.204	11.94	7	7	0.8534	24
