# Supplementary material for: Oxytocin neurons mediate the effect of social isolation via the VTA circuits
Source: eLife journal article supplement (doi:10.7554/elife.73421), 2022-04-22
Supplement: supp [file elife-73421-supp-v1.zip]

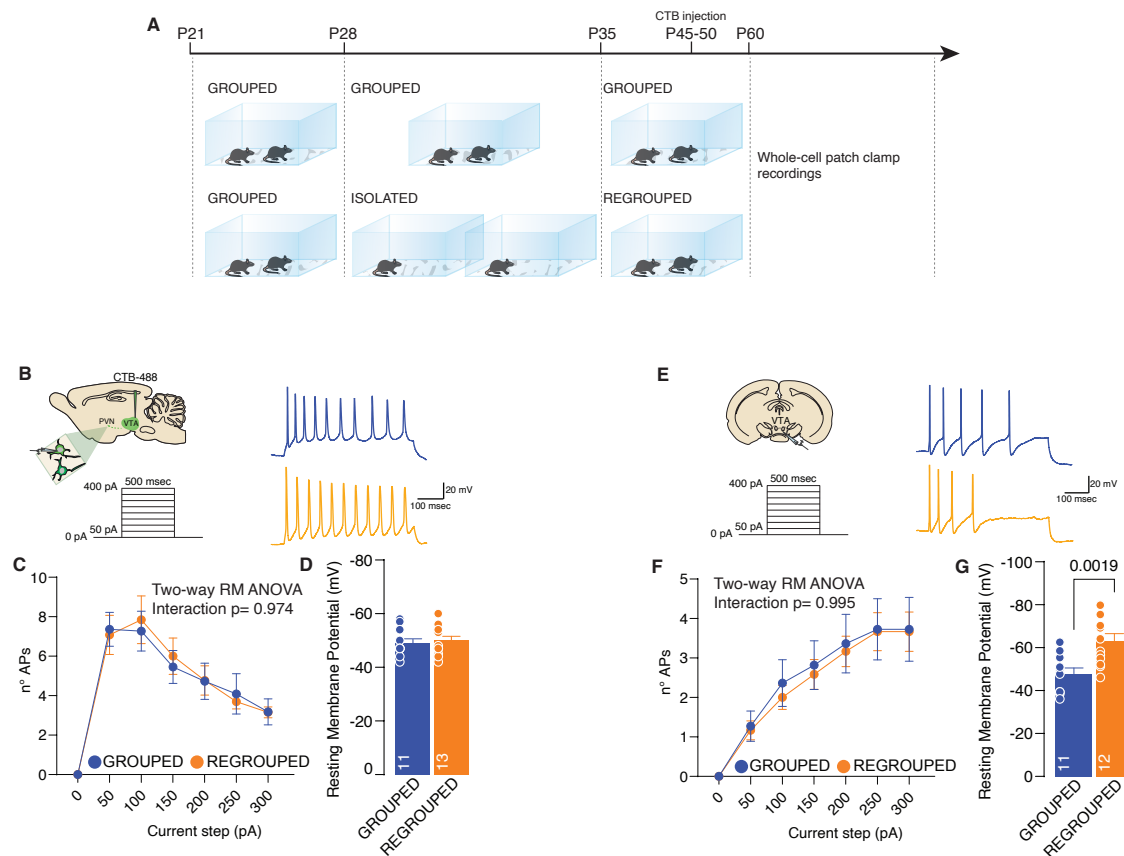

#### Figure 4 - Supplement 2: Regrouping after adolescence social isolation restore PVN and VTA excitability

(A) Experimental design: WT mice were isolated between P28 and P35 and regrouped until P60 or always kept in group. CTB-488 was injected at p45-50. (B) Left: experimental paradigm, PVN neurons were subjected at multiple depolarizing current steps. Right: example traces from 250pA depolarizing current injection. (C) Number of action potentials (APs) across increasing depolarizing current steps (Two-way RM ANOVA, current step x house condition  $F(6, 132) = 0.2047$ ,  $p = 0.9748$ , current step main effect  $F(2.764, 60.82) = 39.55$ ,  $p < 0.001$ , House condition main effect  $F(1, 22) = 0.006080$ ,  $p = 0.9386$ ). (D) Resting membrane potential of recorded cells (Unpaired samples t-test,  $t(22) = 0.4549$ ,  $p = 0.6536$ . Grouped  $n = 11$ , Isolated  $n = 13$  from 3 mice each group). (E) Left: experimental paradigm, VTA pDA neurons were subjected at multiple depolarizing current steps. Right: example traces from 250pA depolarizing current injection. (F) Number of action potentials (APs) across increasing depolarizing current steps (Two-way RM ANOVA, Current step x House condition  $F(6, 126) = 0.1048$ ,  $p = 0.9957$ , Current step main effect  $F(1.983, 41.64) = 50.14$ ,  $p < 0.001$ , House condition main effect  $F(1, 21) = 0.05862$ ,  $p = 0.8110$ ). (G) Resting membrane potential of recorded cells (Unpaired samples t-test,  $t(21) = 3.538$ ,  $p = 0.0019$ . Grouped  $n = 11$ , Isolated  $n = 12$  from 3 mice each group). Data are represented as mean  $\pm$  SEM
