# Supplementary material for: Oxytocin neurons mediate the effect of social isolation via the VTA circuits
Source: eLife journal article supplement (doi:10.7554/elife.73421), 2022-04-22
Supplement: supp [file elife-73421-supp-v1.zip]

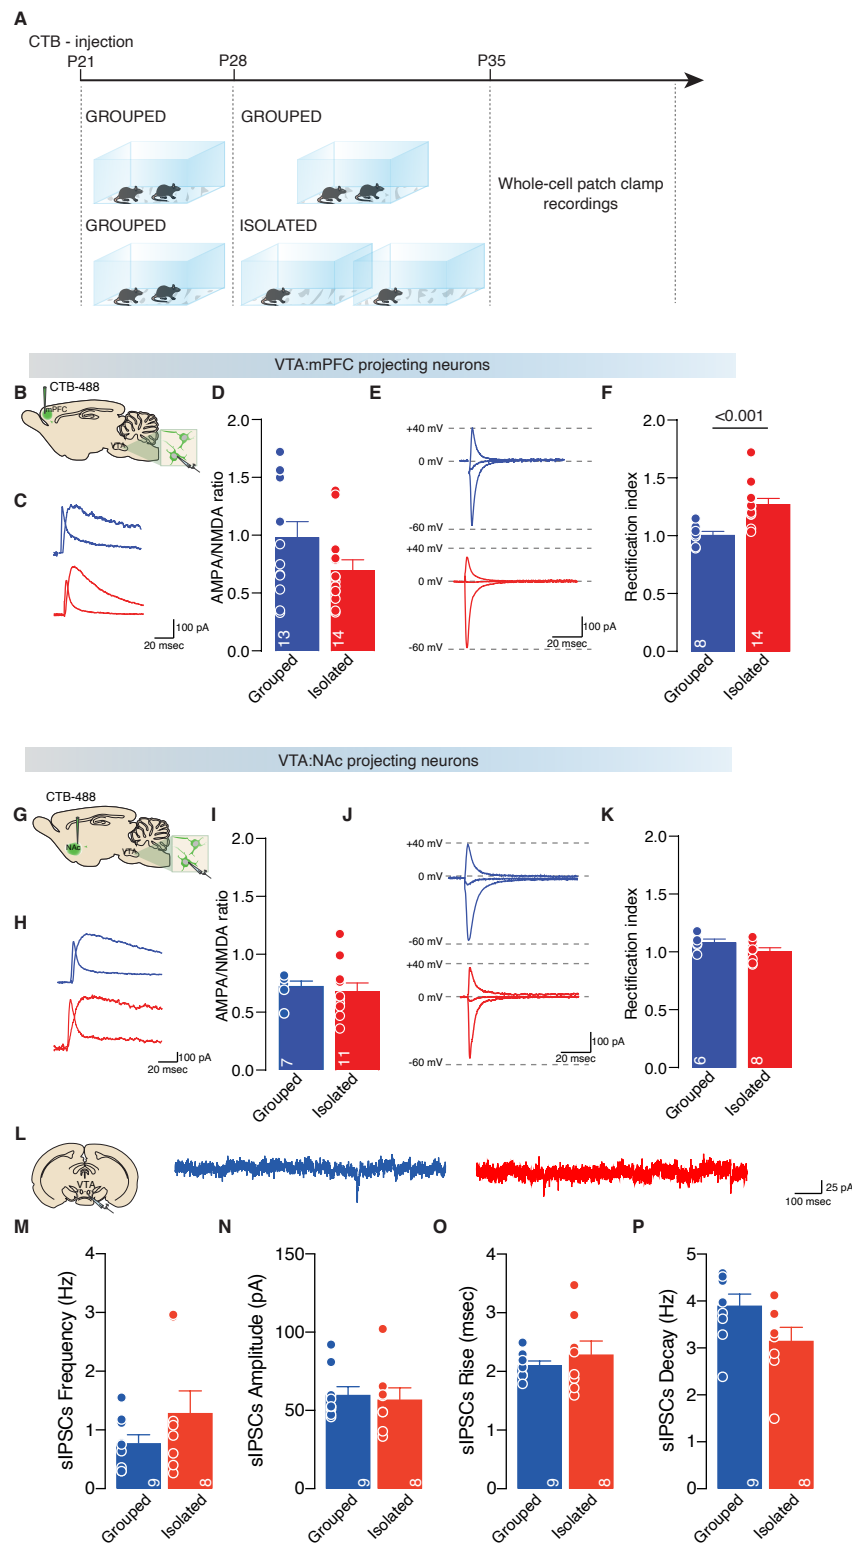

**Figure 5: - Supplement 1: Adolescence acute social isolation induces synaptic scaling in VTA pDA-mPFC projecting neurons.**

(A,B,G) Experimental paradigm. WT mice were injected with 488-CTB in the mPFC (B) or NAc (G) at P21 and isolated between P28 and P35. Then mice were subjected at whole-cell patch clamp recording. (C) Example traces of isolated AMPA and NMDA currents recorded at +40mV. (D) AMPA-NMDA ratio of VTA-pDA:mPFC projecting neurons (Mann-Whitney test,  $U=56$ ,  $p=0.0945$ , Grouped  $n=13$ , Isolated  $n=14$  from 3 mice each group). (E) Example traces of Isolated AMPA current recorded at +40, 0 and -60 mV. (F) Rectification index of VTA-pDA:mPFC projecting neurons (Unpaired samples t-test,  $t_{(20)}=3.964$ ,  $p<0.001$ , Grouped  $n=8$ , Isolated  $n=14$  from 3 mice each group). (H) Example traces of isolated AMPA and NMDA currents recorded at +40mV. (I) AMPA-NMDA ratio of VTA-pDA:NAc projecting neurons (Mann-Whitney test,  $U=29$ ,  $p=0.4252$ , Grouped  $n=7$ , Isolated  $n=11$  from 3 mice each group). (J) Example traces of Isolated AMPA current recorded at +40, 0 and -60 mV. (K) Rectification index of VTA-pDA:NAc projecting neurons (Unpaired samples t-test,  $t_{(12)}=0.1811$ ,  $p=0.0953$ , Grouped  $n=6$ , Isolated  $n=8$  from 3 mice each group). (L) Example traces of sIPSCs recorded from VTA-pDA neurons after juvenile social isolation. (M) sIPSCs frequency (Mann-Whitney test,  $U=29$ ,  $p=0.5414$ , Grouped  $n=9$ , Isolated  $n=8$  from 2 mice each group). (M) sIPSCs amplitude (Mann-Whitney test,  $U=33$ ,  $p=0.8148$ , Grouped  $n=9$ , Isolated  $n=8$  from 2 mice each group). (M) sIPSCs rise (Mann-Whitney test,  $U=34$ ,  $p=0.8884$ , Grouped  $n=9$ , Isolated  $n=8$  from 2 mice each group). (M) sIPSCs decay (Unpaired samples t-test,  $t_{(15)}=1.994$   $p=0.0647$ , Grouped  $n=9$ , Isolated  $n=8$  from 2 mice each group). Data are represented as mean $\pm$ SEM.
