# Supplementary material for: Oxytocin neurons mediate the effect of social isolation via the VTA circuits
Source: eLife journal article supplement (doi:10.7554/elife.73421), 2022-04-22
Supplement: supp [file elife-73421-supp-v1.zip]

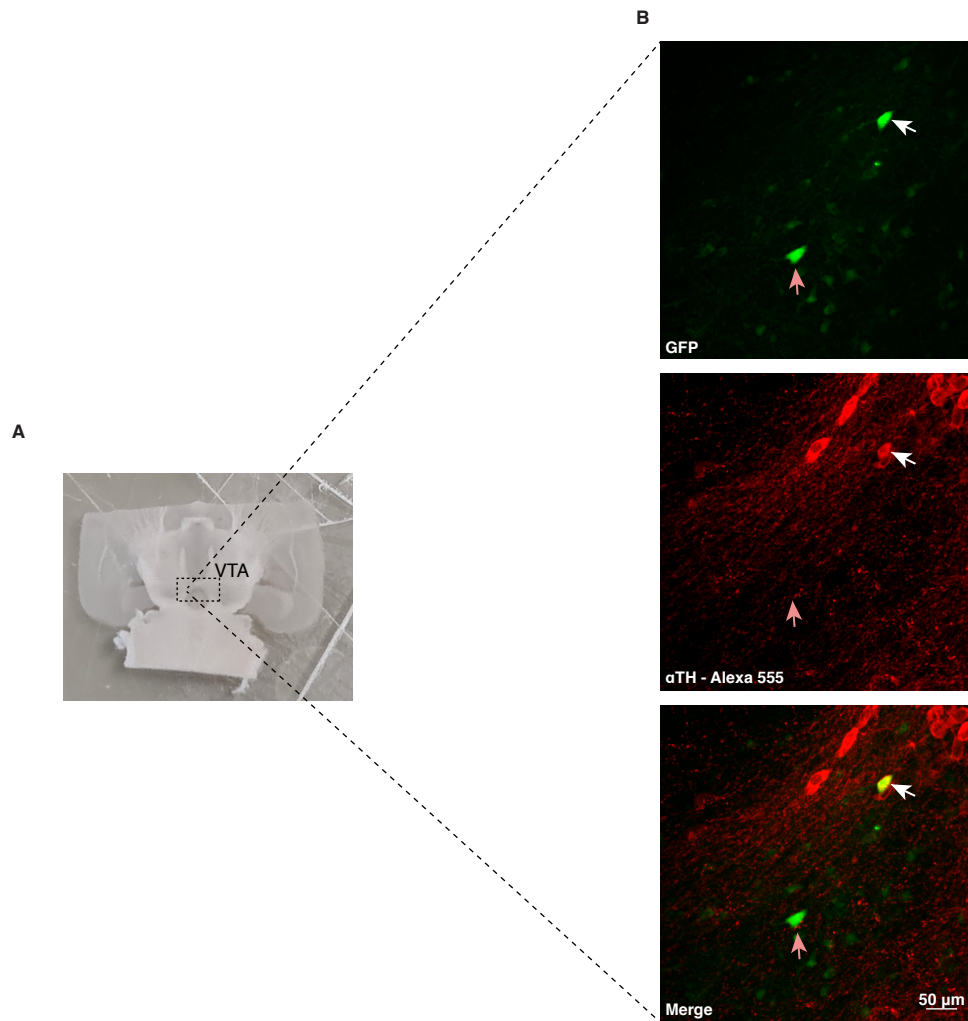

### Figure 5: - Supplement 2: Immunohistochemical validation of VTA-DA neurons

(A) Example of VTA horizontal slice. (B) Confocal images of post-hoc immunohistochemical validation of VTA neurons filled with GFP (Alexa Fluor 488) and stained with TH-antibody. The white arrow indicates a neuron with capacitance of 32pF which is positive for TH staining (DA-neuron). The pink arrow indicates a neuron with capacitance of 22pF which is negative for TH staining (non DA-neuron).
